# Supplementary material for: A toolbox for ablating excitatory and inhibitory synapses
Source: eLife. 2025 Apr 29;13:RP103757. doi: 10.7554/eLife.103757 (PMC12040315; doi:10.7554/eLife.103757)
Supplement: Figure 1—source data 3. [file elife-103757-fig1-data3.xlsx]

## Sheet: Fig. 1B
		all values are background subtracted
	Blot #1
	Date	2023-03-20
	Background:	1168
		PSD95 only	RandE3	PFE3	TAK243 20uM
	PSD95	23253.6	20190.8	8132.08	22254.5
	tubulin	3393.16	4218.31	2994.78	3155.33
	normalized tubulin	0.804387	1	0.709947	0.748008
	normalized PSD95	28908.4	20190.8	11454.5	29751.7
	Blot #2
	Date	2023-07-27	blot 1
	Background:	64
		PSD95 only	RandE3	PFE3	TAK 243 20uM
	PSD95	15338.1	13267.8	7276.27	8818.96
	tubulin	1843.86	2161.6	1463.07	956.046
	normalized tubulin	0.853008	1	0.676843	0.442286
	normalized PSD95	17981.2	15299.4	10750.3	19939.5
	Blot #3
	Date	2023-07-27	blot 2
	Background:	59
		PSD95 only	RandE3	PFE3	TAK 243 20uM
	PSD95	14111.8	13992.2	8198.81	15258.6
	tubulin	1678.33	1648.88	1539.14	1477.33
	normalized tubulin	1	0.98245	0.917064	0.880238
	normalized PSD95	14111.8	14242.2	8940.28	17334.7
	Blot #4
	Date	2023-06-07
	Background:	50
		PSD95 only	RandE3	PFE3	TAK 243 20uM
	PSD95	7910.89	12640.2	7233.51	22530.6
	tubulin	1980.32	3431.47	3197.44	2369.1
	normalized tubulin	0.577107	1	0.931801	0.690405
	normalized PSD95	13707.8	12640.2	7762.94	32633.9
	Blot #5
	Date	2023-04-29
	Background:	440
		PSD95 only	RandE3	PFE3	TAK 243 20uM
	PSD95	26805.7	23854.9	9538.93	14693.7
	tubulin	1414.38	1192.43	924.429	1050.52
	normalized tubulin	1	0.843076	0.653594	0.742745
	normalized PSD95	26805.7	28295.1	14594.6	19783

## Sheet: Fig. 1F
Mdm2 no PIR staining
Date
Construct:
Neuron	BLANK Total Day 0	PSD95 Avg Day 0	PSD95 puncta 0	BLANK Total Day 2	PSD95 avg day 2	PSD95 puncta FingR 2	PSD95 puncta stained	FingR change		synapse number change
100421 PFE3 Ch1N2	749545	0.223822	371	178538		23	96	0.238195	by hand	0.25876	0.74124
100421 PFE3 Ch1N3	862893	145.464	428	208155		125	277	0.241229	by hand	0.647196	0.352804
100421 PFE3 Ch1N6	778108	204.281	249	139873		104	134	0.17976		0.538153	0.461847
101121 PFE3 Ch1N6	1.08287e+06	197.136	439	248050		41	299	0.229068		0.681093	0.318907
101121 PFE3 Ch1N11	706415	143.785	204	116055		159	209	0.164287		1.02451	-0.0245098
101121 PFE3 Ch2N5	1.43724e+06	172.352	670	221545		143	237	0.154146		0.353731	0.646269
101121 PFE3 Ch2N7	609768	111.434	393	19222		16	352	0.0315235		0.895674	0.104326
101121 PFE3 Ch2N19	1.2204e+06	165.031	593	97962		131	144	0.0802703		0.242833	0.757167
101121 PFE3 Ch2N21	998930	161.639	507	74984		85	313	0.0750643		0.617357	0.382643
101121 PFE3 Ch2N1	977028	175.472	452	138038		68	38	0.141284		0.0840708	0.915929
