# Supplementary material for: A toolbox for ablating excitatory and inhibitory synapses
Source: eLife. 2025 Apr 29;13:RP103757. doi: 10.7554/eLife.103757 (PMC12040315; doi:10.7554/eLife.103757)
Supplement: Figure 2—figure supplement 1—source data 1. [file elife-103757-fig2-figsupp1-data1.xlsx]

## Sheet: D, H
	Fig. s2D
	RandE3
	Total PSD95.FingR		PSD95 puncta
	To	RANDE3	To	RANDE3
	1.60617e+06	1.96391e+06	398	578
	1.30983e+06	1.76698e+06	393	480
	1.16e+06	1.61452e+06	350	295
	1.20197e+06	1.573e+06	472	444
	633126	1.79474e+06	289	295
	778957	678359	345	347
	1.26544e+06	1.24056e+06	487	426
	775453	714128	331	266
	recovery RandE3 Fig. S2H
	P68-RFP-ZFL
	TRE-Rnd-HA-Mdm2.RING-TPR3-PIR-P2A GFP
	Date
	Construct:
	Neuron	BLANK Total Day 0	PSD95 Avg Day 0	PSD95 puncta 0	BLANK Total Day 2	PSD95 avg day 2	puncta day2	PSd95 Total day 7	Avg day 7	Day 7 puncta	day2/0	day7/0
	110722 RecRnd Ch1N3	1.21686e+06	187.989	563	1.29482e+06	204.295	538	979388	199.916	395	95.5595	70.1599
	110722 RecRnd Ch1N4	1.66033e+06	453.642	255	1.55256e+06	293.213	394	1.28277e+06	306.223	310	154.51	121.569
	110722 RecRnd Ch1N6	1.58671e+06	287.24	412	1.34576e+06	303.988	313	1.05772e+06	469.264	127	75.9709	30.8252
	110722 RecRnd Ch1N9	727502	150.528	312	1.01248e+06	211.993	318	1.04284e+06	206.38	380	101.923	121.795
	110722 RecRnd Ch1N18	1.83066e+06	170.58	789	1.72752e+06	185.396	763	1.40065e+06	220.575	526	96.7047	66.6667
	110722 RecRnd Ch1N19	1.97262e+06	306.498	448	1.7792e+06	263.118	506	1.38429e+06	303.174	352	112.946	78.5714
	110722 RecRnd Ch1N20	1.32512e+06	208.681	537	1.34776e+06	212.581	489	799759	204.647	297	91.0615	55.3073
	022123 RndRec N1	726897	133.131	340	805389	140.852	342	853934	154.867	354	100.588	104.118
	022123 RndRec N12	866654	143.628	372	816210	142.794	350	1.04106e+06	170.777	402	94.086	108.065
	022823 RndE3 ch1N2	802201	159.865	285	1.293e+06	241.231	390	764855	182.152	270	136.842	94.7368
	022823 RndE3 ch1N8	969637	178.209	350	1.06976e+06	212.423	337	803606	187.846	257	96.2857	73.4286
	022823 RndE3 ch1N15	1.0478e+06	167.193	396	994990	161.002	383	815493	142.171	369	96.7172	93.1818
	022823 RndE3 ch2N4	744732	166.943	247	878611	160.624	305	614272	143.22	278	123.482	112.551
	022823 RndE3 ch2N5	751201	158.148	283	625550	170.496	236	379631	97.2166	208	83.3922	73.4982
	022823 RndE3 ch2N8	940809	228.796	251	899291	214.474	281	538512	211.016	171	111.952	68.1275

## Sheet: L
	Neurons transfected with Dox-ind PFE3, quantified at T0, before Dox							FingR Only neurons, not transfected with PFE3
								Neuron	PSD95 Total	PSD95 avg intensity	# PSd95 puncta
								012721 N9	682967	160.283	228
								020321 N7	698226	164.521	241
	Neuron	PSD95 Total Day 0	PSD95 Avg Day 0	PSD95 puncta 0				020321 N9	859241	142.731	347
	120822 RecE3 Ch1N1	750756	144.906	393				020321 N10	999200	141.45	428
	120822 RecE3 Ch1N14	865559	199.3	387				0128 B6N1	784313	154.362	144
	120822 RecE3 Ch1N14-2	965474	209.203	355				0128B6N5	728168	173.621	227
	120822 RecE3 Ch1N16	1.15417e+06	245.358	376				0128B6N7	1.12446e+06	148.111	394
	120822 RecE3 Ch2N16	892069	209.652	344				091721 2X only Ch1N5	878024	172.873	355
	120822 RecE3 Ch3N8	843446	156.338	400				091721 2X only Ch1N6	1.03457e+06	174.789	461
	120822 RecE3 Ch3N9	1.01644e+06	164.606	471				091721 2X only Ch1N8	869138	146.074	620
	120822 RecE3 Ch3N14	884029	198.035	341
	120822 RecE3 Ch3N21	949634	224.235	333
	120822 RecE3 Ch3N22	794584	246.154	243
	091721 2X Only Ch1N2	1.309e+06	160.653	620
	091721 2X Only Ch1N5	878024	172.873	355
	091721 2X Only Ch1N6	1.03457e+06	174.789	461
	091721 2X Only Ch1N8	869138	146.074	490
