# Supplementary material for: A toolbox for ablating excitatory and inhibitory synapses
Source: eLife. 2025 Apr 29;13:RP103757. doi: 10.7554/eLife.103757 (PMC12040315; doi:10.7554/eLife.103757)
Supplement: Figure 2—source data 1. [file elife-103757-fig2-data1.xlsx]

## Sheet: Sheet1
Fig. 2D
PFE3								Fig. 2H
								PFE3				Control			RANDE3
Total PSD95.FingR		PSD95 puncta						Stained # PSd95	Stained GluA1		% GluA1 positive	Stained # puncta	Stained GluA1 #	% GluA1 positive	Stained # puncta	Stained GluA1 #	% GluA1 positive
To	PFE3	To	PFE3					105	46	counted by hand, no quant file	0.438095	795	677	85.1572	578	528	0.913495
1.02373e+06	466151	376	49					130	59		0.453846	1030	923	89.6117
1.02897e+06	165224	295	94					194	31		0.159794	1153	1077	93.4085	480	386	0.804167
791614	248962	395	97					39	25		0.641026	455	409	89.8901	295	228	0.772881
2.39344e+06	1.30168e+06	301	67					152	68		0.447368	1458	1295	88.8203	444	385	0.867117
937824	363640	393	40					177	106		0.59887	871	711	81.6303	295	277	0.938983
1.70883e+06	740881	327	140					53	5		0.0943396	712	666	93.5393	347	312	0.899135
1.45106e+06	419282	566	116					87	37		0.425287	576	520	90.2778	426	386	0.906103
1.31082e+06	402760	510	127					119	57		0.478992	520	466	89.6154	266	235	0.883459
1.3122e+06	794703	440	249					210	78		0.371429
1.46907e+06	364885	515	121							mean	0.410905
909513	344769	353	102													mean	0.873168
1.41396e+06	465574	439	150										mean	89.1056
1.41013e+06	219268	497	92
1.2093e+06	308203	299	86
Recovery Fig 2L
P68-RFP-ZFL
TRE-P68-HA-Mdm2.RING-TPR3-PIR-P2A GFP
Date
Construct:
Neuron	PSD95 Total Day 0	PSD95 Avg Day 0	PSD95 puncta 0	PSD95 Total Day 2	PSD95 avg day 2	puncta day2	PSd95 Total day 7	Avg day 7	Day 7 puncta	day2/0	day7/0
121222 E3 Rec Ch2N13	427238	131.579	261	226765	116.529	128	747247	180.756	334	49.0421	137.375
110722 RecE3 Ch1N25	2.03613e+06	264.055	621	141294	122.651	61	871931	185.636	352	9.82287	70.3019
110722 RecE3 Ch1N12	946159	466.318	151	136074	186.148	42	1.49542e+06	349.478	301	27.8146	74.9442
021423 PFE3Rec Ch2N11	919670	190.487	336	211808	188.274	47	1.03283e+06	212.91	269	13.9881	111.772
021423 PFE3Rec Ch2N7	709249	168.668	268	104087	242.063	19	196561	83.6786	120	7.08955	49.6114
021423 PFE3Rec Ch1N7	905910	243.786	254	146601	102.662	49	482455	163.655	178	19.2913	67.1305
021423 PFE3Rec Ch1N2	780402	194.517	289	55906	55.1885	56	308027	153.937	134	19.3772	79.1378
022823 RecE3Ch2N7	365205	150.849	143	51368	99.5504	20	416212	214.321	124	13.986	142.077
	BLANK Total Day 0	BLANK Total Day 2	PSd95 Total day 7
	42.7238	22.6765	74.7247
	203.613	14.1294	87.1931
	94.6159	13.6074	149.542
	91.967	21.1808	103.283
	70.9249	10.4087	19.6561
	90.591	14.6601	48.2455
	78.0402	5.5906	30.8027
	36.5205	5.1368	41.6212
