# Supplementary material for: A toolbox for ablating excitatory and inhibitory synapses
Source: eLife. 2025 Apr 29;13:RP103757. doi: 10.7554/eLife.103757 (PMC12040315; doi:10.7554/eLife.103757)
Supplement: Figure 3—source data 1. [file elife-103757-fig3-data1.xlsx]

## Sheet: Fig. 3B
		PFE 500 ms stim	PFE TTP	cont 500 ms stim	Cont TTP
		-53.463	0.05094	-477.04	0.01554
		-118.45	0.10524	-294.56	0.02524
		-20.728	0.11194	-158.96	0.03684
		-28.037	0.07874	-304.3	0.01884
		-306.4	0.02684	-523.9	0.02984
		-85.61	0.02404	-496.94	0.03384
		-30.034	0.02254	-408.43	0.01624
		-42.301	0.05474	-898.01	0.01394
		-25.575	0.22094
		500 ms		TTP
		p = 0.0004 ttest
		p = 0.0006		p =0.01
	average	-78.9553	-445.268	0.0773289	0.02379
	std	91.2102	220.633	0.0634433	0.00891708
	sem	-26.3184	78.0055	0.0211478	0.00315266
		500 ms decrease		time change
	reduction	0.822679		0.692353

## Sheet: Figure 3C, D
	Time	0	Opto stim		Control	Opto stim
	0.85	1.77e-12	1.28e-12	4.99936e-11	-2.2e-11	-7.75e-13	5.00039e-11
	0.85	1.89e-12	1.28e-12	4.99936e-11	-2.2e-11	-1.05e-12	5.00053e-11
	0.85	1.93e-12	5.95e-13	4.9997e-11	-2.23e-11	-5.03e-13	5.00025e-11
	0.85	1.95e-12	-2.44e-13	5.00012e-11	-2.25e-11	1.07e-13	4.99995e-11
	0.85	1.88e-12	-7.02e-13	5.00035e-11	-2.25e-11	8.53e-13	4.99957e-11
	0.85	1.81e-12	-1.27e-12	5.00064e-11	-2.24e-11	6.49e-13	4.99968e-11
	0.85	1.79e-12	-1.08e-12	5.00054e-11	-2.25e-11	6.49e-13	4.99968e-11
	0.85	1.9e-12	-1.43e-12	5.00071e-11	-2.21e-11	3.1e-13	4.99984e-11
	0.85	1.95e-12	-1.39e-12	5.0007e-11	-2.11e-11	3.91e-14	4.99998e-11
	0.851	1.89e-12	-1.08e-12	5.00054e-11	-2.09e-11	-3e-13	5.00015e-11
	0.851	1.83e-12	-5.11e-13	5.00026e-11	-2.11e-11	-8.43e-13	5.00042e-11
	0.851	1.77e-12	-1.49e-14	5.00001e-11	-2.09e-11	-7.07e-13	5.00035e-11
	0.851	1.76e-12	3.67e-13	4.99982e-11	-2.11e-11	-2.87e-14	5.00001e-11
	0.851	1.9e-12	7.86e-13	4.99961e-11	-2.13e-11	3.78e-13	4.99981e-11
	0.851	1.89e-12	9.77e-13	4.99951e-11	-2.08e-11	6.49e-13	4.99968e-11
	0.851	1.8e-12	1.4e-12	4.9993e-11	-2.08e-11	5.82e-13	4.99971e-11
	0.851	1.8e-12	1.55e-12	4.99922e-11	-1.99e-11	5.14e-13	4.99974e-11
	0.851	1.81e-12	1.4e-12	4.9993e-11	-1.95e-11	2.43e-13	4.99988e-11
	0.851	1.86e-12	8.24e-13	4.99959e-11	-1.98e-11	-3.68e-13	5.00018e-11
	0.851	1.85e-12	4.05e-13	4.9998e-11	-1.99e-11	-7.75e-13	5.00039e-11
	0.851	1.88e-12	-2.06e-13	5.0001e-11	-2.01e-11	-9.1e-13	5.00046e-11
	0.851	1.96e-12	-8.54e-13	5.00043e-11	-1.96e-11	-5.71e-13	5.00029e-11
	0.851	1.94e-12	-1.24e-12	5.00062e-11	-1.95e-11	2.43e-13	4.99988e-11
	0.851	1.89e-12	-1.69e-12	5.00085e-11	-2.01e-11	5.82e-13	4.99971e-11
	0.851	1.87e-12	-1.66e-12	5.00083e-11	-2.02e-11	5.82e-13	4.99971e-11
	0.851	1.87e-12	-1.43e-12	5.00071e-11	-2.06e-11	7.17e-13	4.99964e-11
	0.851	1.84e-12	-1.04e-12	5.00052e-11	-2.02e-11	1.75e-13	4.99991e-11
	0.851	2.01e-12	-6.63e-13	5.00033e-11	-2.06e-11	-3e-13	5.00015e-11
	0.851	1.99e-12	-2.06e-13	5.0001e-11	-2.16e-11	-6.39e-13	5.00032e-11
	0.852	1.87e-12	2.52e-13	4.99987e-11	-2.17e-11	-7.75e-13	5.00039e-11
	0.852	1.86e-12	8.24e-13	4.99959e-11	-2.18e-11	-7.07e-13	5.00035e-11
	0.852	1.94e-12	1.36e-12	4.99932e-11	-2.13e-11	3.1e-13	4.99984e-11
	0.852	1.99e-12	1.47e-12	4.99927e-11	-2.14e-11	9.89e-13	4.99951e-11
	0.852	1.87e-12	1.63e-12	4.99919e-11	-2.16e-11	7.17e-13	4.99964e-11
	0.852	1.95e-12	1.28e-12	4.99936e-11	-2.14e-11	5.82e-13	4.99971e-11
	0.852	2.09e-12	7.1e-13	4.99965e-11	-2.09e-11	5.82e-13	4.99971e-11
	0.852	1.93e-12	2.33e-14	4.99999e-11	-2.14e-11	-3e-13	5.00015e-11
	0.852	1.87e-12	-2.82e-13	5.00014e-11	-2.12e-11	-5.03e-13	5.00025e-11
	0.852	1.87e-12	-1.01e-12	5.00051e-11	-2.11e-11	-9.1e-13	5.00046e-11
	0.852	1.87e-12	-1.5e-12	5.00075e-11	-2.18e-11	-7.75e-13	5.00039e-11
	0.852	1.96e-12	-1.69e-12	5.00085e-11	-2.19e-11	-2.32e-13	5.00012e-11
	0.852	2.15e-12	-1.58e-12	5.00079e-11	-2.18e-11	3.78e-13	4.99981e-11
	0.852	2.01e-12	-1.16e-12	5.00058e-11	-2.16e-11	7.85e-13	4.99961e-11
	0.852	1.77e-12	-6.25e-13	5.00031e-11	-2.1e-11	7.85e-13	4.99961e-11
	0.852	1.89e-12	-9.12e-14	5.00005e-11	-2.09e-11	4.46e-13	4.99978e-11
	0.852	2e-12	1.38e-13	4.99993e-11	-2.14e-11	1.07e-13	4.99995e-11
	0.852	1.92e-12	5.19e-13	4.99974e-11	-2.11e-11	-3e-13	5.00015e-11
	0.852	1.87e-12	1.13e-12	4.99944e-11	-2.1e-11	-8.43e-13	5.00042e-11
	0.852	1.91e-12	1.4e-12	4.9993e-11	-2.1e-11	-9.1e-13	5.00046e-11
	0.853	1.97e-12	1.4e-12	4.9993e-11	-2.15e-11	-3.68e-13	5.00018e-11
	0.853	1.96e-12	1.43e-12	4.99929e-11	-2.09e-11	2.43e-13	4.99988e-11
	0.853	1.91e-12	1.05e-12	4.99948e-11	-2.06e-11	6.49e-13	4.99968e-11
	0.853	1.9e-12	5.57e-13	4.99972e-11	-2.06e-11	5.82e-13	4.99971e-11
	0.853	1.88e-12	-2.44e-13	5.00012e-11	-2.04e-11	5.82e-13	4.99971e-11
	0.853	1.78e-12	-7.4e-13	5.00037e-11	-2.06e-11	3.78e-13	4.99981e-11
	0.853	1.94e-12	-1.2e-12	5.0006e-11	-2.02e-11	-2.87e-14	5.00001e-11
	0.853	1.93e-12	-1.46e-12	5.00073e-11	-2e-11	-7.07e-13	5.00035e-11
	0.853	1.96e-12	-1.58e-12	5.00079e-11	-1.99e-11	-7.75e-13	5.00039e-11
	0.853	1.93e-12	-1.39e-12	5.0007e-11	-1.98e-11	-4.36e-13	5.00022e-11
	0.853	1.9e-12	-1.12e-12	5.00056e-11	-1.94e-11	-2.32e-13	5.00012e-11
	0.853	1.87e-12	-6.63e-13	5.00033e-11	-1.92e-11	7.85e-13	4.99961e-11
	0.853	1.83e-12	-1.49e-14	5.00001e-11	-1.92e-11	1.06e-12	4.99947e-11
	0.853	1.77e-12	7.1e-13	4.99965e-11	-1.85e-11	6.49e-13	4.99968e-11
	0.853	1.79e-12	1.21e-12	4.99939e-11	-1.84e-11	3.78e-13	4.99981e-11
	0.853	1.87e-12	1.66e-12	4.99917e-11	-1.83e-11	-9.66e-14	5.00005e-11
	0.853	1.9e-12	1.59e-12	4.99921e-11	-1.83e-11	-5.03e-13	5.00025e-11
	0.853	1.95e-12	1.74e-12	4.99913e-11	-1.85e-11	-1.05e-12	5.00053e-11
	0.853	1.93e-12	1.55e-12	4.99922e-11	-1.84e-11	-1.11e-12	5.00056e-11
	0.853	1.82e-12	7.1e-13	4.99965e-11	-1.73e-11	-3e-13	5.00015e-11
	0.854	1.8e-12	6.14e-14	4.99997e-11	-1.71e-11	4.46e-13	4.99978e-11
	0.854	1.77e-12	-5.87e-13	5.00029e-11	-1.69e-11	1.12e-12	4.99944e-11
	0.854	1.76e-12	-1.27e-12	5.00064e-11	-1.74e-11	7.17e-13	4.99964e-11
	0.854	1.87e-12	-1.35e-12	5.00068e-11	-1.78e-11	2.43e-13	4.99988e-11
	0.854	1.83e-12	-1.73e-12	5.00086e-11	-1.79e-11	2.43e-13	4.99988e-11
	0.854	1.92e-12	-1.66e-12	5.00083e-11	-1.79e-11	-9.66e-14	5.00005e-11
	0.854	1.83e-12	-1.27e-12	5.00064e-11	-1.77e-11	-6.39e-13	5.00032e-11
	0.854	1.8e-12	-6.25e-13	5.00031e-11	-1.7e-11	-1.11e-12	5.00056e-11
	0.854	1.83e-12	-5.3e-14	5.00003e-11	-1.67e-11	-9.1e-13	5.00046e-11
	0.854	1.88e-12	3.67e-13	4.99982e-11	-1.64e-11	1.07e-13	4.99995e-11
	0.854	1.85e-12	6.72e-13	4.99966e-11	-1.71e-11	7.17e-13	4.99964e-11
	0.854	1.72e-12	1.51e-12	4.99924e-11	-1.66e-11	8.53e-13	4.99957e-11
	0.854	1.76e-12	1.51e-12	4.99924e-11	-1.55e-11	1.06e-12	4.99947e-11
	0.854	1.82e-12	1.78e-12	4.99911e-11	-1.57e-11	-9.66e-14	5.00005e-11
	0.854	1.88e-12	1.55e-12	4.99922e-11	-1.55e-11	1.07e-13	4.99995e-11
	0.854	1.8e-12	1.05e-12	4.99948e-11	-1.56e-11	-6.39e-13	5.00032e-11
	0.854	1.82e-12	5.95e-13	4.9997e-11	-1.59e-11	-1.05e-12	5.00053e-11
	0.854	1.9e-12	-2.44e-13	5.00012e-11	-1.51e-11	-8.43e-13	5.00042e-11
	0.854	1.86e-12	-1.04e-12	5.00052e-11	-1.51e-11	-3e-13	5.00015e-11
	0.854	1.77e-12	-1.54e-12	5.00077e-11	-1.53e-11	6.49e-13	4.99968e-11
	0.855	1.67e-12	-2e-12	5.001e-11	-1.55e-11	1.26e-12	4.99937e-11
	0.855	1.8e-12	-1.81e-12	5.00091e-11	-1.53e-11	7.17e-13	4.99964e-11
	0.855	1.91e-12	-1.96e-12	5.00098e-11	-1.49e-11	2.43e-13	4.99988e-11
	0.855	1.9e-12	-1.54e-12	5.00077e-11	-1.55e-11	-1.64e-13	5.00008e-11
	0.855	1.92e-12	-8.54e-13	5.00043e-11	-1.56e-11	-3.68e-13	5.00018e-11
	0.855	1.81e-12	-1.49e-14	5.00001e-11	-1.48e-11	-4.36e-13	5.00022e-11
	0.855	1.79e-12	4.81e-13	4.99976e-11	-1.46e-11	-9.1e-13	5.00046e-11
	0.855	1.84e-12	1.28e-12	4.99936e-11	-1.49e-11	-9.66e-14	5.00005e-11
	0.855	1.92e-12	1.78e-12	4.99911e-11	-1.55e-11	5.14e-13	4.99974e-11
	0.855	1.91e-12	1.89e-12	4.99906e-11	-1.54e-11	8.53e-13	4.99957e-11
	0.855	1.89e-12	1.93e-12	4.99904e-11	-1.53e-11	1.06e-12	4.99947e-11
	0.855	1.8e-12	1.66e-12	4.99917e-11	-1.49e-11	2.43e-13	4.99988e-11
	0.855	1.83e-12	1.17e-12	4.99942e-11	-1.53e-11	-9.66e-14	5.00005e-11
	0.855	1.95e-12	3.67e-13	4.99982e-11	-1.53e-11	-3.68e-13	5.00018e-11
	0.855	1.96e-12	-2.82e-13	5.00014e-11	-1.48e-11	-7.75e-13	5.00039e-11
	0.855	1.88e-12	-1.31e-12	5.00066e-11	-1.56e-11	-9.78e-13	5.00049e-11
	0.855	1.86e-12	-1.58e-12	5.00079e-11	-1.51e-11	-7.07e-13	5.00035e-11
	0.855	1.8e-12	-1.81e-12	5.00091e-11	-1.49e-11	2.43e-13	4.99988e-11
	0.855	1.94e-12	-1.85e-12	5.00093e-11	-1.57e-11	9.21e-13	4.99954e-11
	0.855	1.86e-12	-1.58e-12	5.00079e-11	-1.58e-11	1.33e-12	4.99934e-11
	0.856	1.81e-12	-1.12e-12	5.00056e-11	-1.6e-11	6.49e-13	4.99968e-11
	0.856	1.78e-12	-4.73e-13	5.00024e-11	-1.6e-11	3.78e-13	4.99981e-11
	0.856	1.9e-12	1.38e-13	4.99993e-11	-1.59e-11	-1.64e-13	5.00008e-11
	0.856	1.85e-12	6.72e-13	4.99966e-11	-1.59e-11	-6.39e-13	5.00032e-11
	0.856	1.82e-12	1.17e-12	4.99942e-11	-1.63e-11	-8.43e-13	5.00042e-11
	0.856	1.91e-12	1.82e-12	4.99909e-11	-1.57e-11	-9.78e-13	5.00049e-11
	0.856	1.9e-12	2.08e-12	4.99896e-11	-1.6e-11	-1.64e-13	5.00008e-11
	0.856	1.84e-12	1.78e-12	4.99911e-11	-1.66e-11	4.46e-13	4.99978e-11
	0.856	1.72e-12	1.59e-12	4.99921e-11	-1.72e-11	7.85e-13	4.99961e-11
	0.856	1.76e-12	7.48e-13	4.99963e-11	-1.76e-11	9.21e-13	4.99954e-11
	0.856	1.86e-12	1.38e-13	4.99993e-11	-1.88e-11	4.46e-13	4.99978e-11
	0.856	1.83e-12	-7.02e-13	5.00035e-11	-2.05e-11	-1.64e-13	5.00008e-11
	0.856	1.91e-12	-1.43e-12	5.00071e-11	-2.08e-11	-2.87e-14	5.00001e-11
	0.856	1.88e-12	-2e-12	5.001e-11	-2.08e-11	-7.07e-13	5.00035e-11
	0.856	1.91e-12	-2.11e-12	5.00106e-11	-2.15e-11	-8.43e-13	5.00042e-11
	0.856	1.81e-12	-1.85e-12	5.00093e-11	-2.07e-11	-6.39e-13	5.00032e-11
	0.856	1.86e-12	-1.5e-12	5.00075e-11	-2e-11	1.75e-13	4.99991e-11
	0.856	1.8e-12	-9.3e-13	5.00047e-11	-2.01e-11	8.53e-13	4.99957e-11
	0.856	1.67e-12	9.96e-14	4.99995e-11	-2.02e-11	7.85e-13	4.99961e-11
	0.856	1.8e-12	8.24e-13	4.99959e-11	-1.99e-11	7.17e-13	4.99964e-11
	0.857	1.91e-12	1.28e-12	4.99936e-11	-1.93e-11	3.91e-14	4.99998e-11
	0.857	1.9e-12	1.74e-12	4.99913e-11	-1.96e-11	-3.68e-13	5.00018e-11
	0.857	1.74e-12	1.85e-12	4.99908e-11	-1.94e-11	-5.03e-13	5.00025e-11
	0.857	1.75e-12	1.93e-12	4.99904e-11	-1.88e-11	-9.1e-13	5.00046e-11
	0.857	1.8e-12	1.74e-12	4.99913e-11	-1.89e-11	-5.71e-13	5.00029e-11
	0.857	1.78e-12	1.17e-12	4.99942e-11	-1.82e-11	-2.87e-14	5.00001e-11
	0.857	1.82e-12	4.05e-13	4.9998e-11	-1.76e-11	5.82e-13	4.99971e-11
	0.857	1.83e-12	-4.73e-13	5.00024e-11	-1.72e-11	8.53e-13	4.99957e-11
	0.857	1.84e-12	-1.04e-12	5.00052e-11	-1.72e-11	3.1e-13	4.99984e-11
	0.857	1.77e-12	-1.96e-12	5.00098e-11	-1.73e-11	2.43e-13	4.99988e-11
	0.857	1.7e-12	-1.88e-12	5.00094e-11	-1.69e-11	-2.32e-13	5.00012e-11
	0.857	1.72e-12	-2.07e-12	5.00103e-11	-1.6e-11	-3.68e-13	5.00018e-11
	0.857	1.66e-12	-1.54e-12	5.00077e-11	-1.67e-11	-6.39e-13	5.00032e-11
	0.857	1.74e-12	-1.01e-12	5.00051e-11	-1.71e-11	-9.1e-13	5.00046e-11
	0.857	1.74e-12	-3.96e-13	5.0002e-11	-1.67e-11	-5.71e-13	5.00029e-11
	0.857	1.77e-12	1.76e-13	4.99991e-11	-1.59e-11	2.43e-13	4.99988e-11
	0.857	1.74e-12	8.24e-13	4.99959e-11	-1.55e-11	9.89e-13	4.99951e-11
	0.857	1.78e-12	1.24e-12	4.99938e-11	-1.55e-11	1.12e-12	4.99944e-11
	0.857	1.74e-12	1.82e-12	4.99909e-11	-1.49e-11	2.43e-13	4.99988e-11
	0.857	1.62e-12	2.16e-12	4.99892e-11	-1.54e-11	-2.32e-13	5.00012e-11
	0.858	1.72e-12	1.97e-12	4.99902e-11	-1.64e-11	-3e-13	5.00015e-11
	0.858	1.8e-12	1.51e-12	4.99924e-11	-1.6e-11	-5.03e-13	5.00025e-11
	0.858	1.79e-12	7.48e-13	4.99963e-11	-1.52e-11	-7.75e-13	5.00039e-11
	0.858	1.74e-12	-1.49e-14	5.00001e-11	-1.48e-11	-5.71e-13	5.00029e-11
	0.858	1.77e-12	-9.3e-13	5.00047e-11	-1.44e-11	2.43e-13	4.99988e-11
	0.858	1.8e-12	-1.77e-12	5.00088e-11	-1.42e-11	6.49e-13	4.99968e-11
	0.858	1.71e-12	-2.11e-12	5.00106e-11	-1.43e-11	7.85e-13	4.99961e-11
	0.858	1.74e-12	-2.42e-12	5.00121e-11	-1.47e-11	5.14e-13	4.99974e-11
	0.858	1.69e-12	-2.15e-12	5.00108e-11	-1.5e-11	-2.87e-14	5.00001e-11
	0.858	1.58e-12	-1.73e-12	5.00086e-11	-1.53e-11	1.07e-13	4.99995e-11
	0.858	1.63e-12	-7.4e-13	5.00037e-11	-1.51e-11	-4.36e-13	5.00022e-11
	0.858	1.63e-12	9.96e-14	4.99995e-11	-1.49e-11	-6.39e-13	5.00032e-11
	0.858	1.65e-12	6.72e-13	4.99966e-11	-1.55e-11	-3e-13	5.00015e-11
	0.858	1.79e-12	1.32e-12	4.99934e-11	-1.52e-11	-3e-13	5.00015e-11
	0.858	1.85e-12	1.93e-12	4.99904e-11	-1.5e-11	5.82e-13	4.99971e-11
	0.858	1.73e-12	2.2e-12	4.9989e-11	-1.48e-11	8.53e-13	4.99957e-11
	0.858	1.64e-12	2.24e-12	4.99888e-11	-1.5e-11	6.49e-13	4.99968e-11
	0.858	1.73e-12	2.05e-12	4.99898e-11	-1.5e-11	2.43e-13	4.99988e-11
	0.858	1.79e-12	1.4e-12	4.9993e-11	-1.53e-11	-2.32e-13	5.00012e-11
	0.858	1.73e-12	4.81e-13	4.99976e-11	-1.5e-11	-3e-13	5.00015e-11
	0.859	1.64e-12	-3.2e-13	5.00016e-11	-1.47e-11	-1.05e-12	5.00053e-11
	0.859	1.56e-12	-1.16e-12	5.00058e-11	-1.41e-11	-8.43e-13	5.00042e-11
	0.859	1.65e-12	-1.88e-12	5.00094e-11	-1.4e-11	-5.03e-13	5.00025e-11
	0.859	1.76e-12	-2.23e-12	5.00112e-11	-1.45e-11	3.91e-14	4.99998e-11
	0.859	1.73e-12	-2.07e-12	5.00103e-11	-1.49e-11	1.12e-12	4.99944e-11
	0.859	1.7e-12	-1.92e-12	5.00096e-11	-1.48e-11	9.89e-13	4.99951e-11
	0.859	1.81e-12	-1.39e-12	5.0007e-11	-1.36e-11	3.78e-13	4.99981e-11
	0.859	1.8e-12	-8.16e-13	5.00041e-11	-1.35e-11	3.91e-14	4.99998e-11
	0.859	1.76e-12	6.14e-14	4.99997e-11	-1.34e-11	-2.32e-13	5.00012e-11
	0.859	1.79e-12	6.72e-13	4.99966e-11	-1.37e-11	-7.07e-13	5.00035e-11
	0.859	1.74e-12	1.43e-12	4.99929e-11	-1.3e-11	-8.43e-13	5.00042e-11
	0.859	1.76e-12	1.93e-12	4.99904e-11	-1.31e-11	-8.43e-13	5.00042e-11
	0.859	1.73e-12	2.2e-12	4.9989e-11	-1.33e-11	-9.66e-14	5.00005e-11
	0.859	1.76e-12	2.12e-12	4.99894e-11	-1.31e-11	5.82e-13	4.99971e-11
	0.859	1.76e-12	1.78e-12	4.99911e-11	-1.31e-11	1.12e-12	4.99944e-11
	0.859	1.81e-12	9.39e-13	4.99953e-11	-1.29e-11	7.17e-13	4.99964e-11
	0.859	1.82e-12	6.14e-14	4.99997e-11	-1.24e-11	1.75e-13	4.99991e-11
	0.859	1.8e-12	-9.69e-13	5.00048e-11	-1.21e-11	-9.66e-14	5.00005e-11
	0.859	1.79e-12	-1.85e-12	5.00093e-11	-1.22e-11	-5.71e-13	5.00029e-11
	0.859	1.74e-12	-2.27e-12	5.00114e-11	-1.31e-11	-7.75e-13	5.00039e-11
	0.86	1.8e-12	-2.46e-12	5.00123e-11	-1.32e-11	-9.1e-13	5.00046e-11
	0.86	1.78e-12	-2.27e-12	5.00114e-11	-1.37e-11	-3.68e-13	5.00018e-11
	0.86	1.77e-12	-1.66e-12	5.00083e-11	-1.35e-11	5.14e-13	4.99974e-11
	0.86	1.68e-12	-9.3e-13	5.00047e-11	-1.3e-11	8.53e-13	4.99957e-11
	0.86	1.77e-12	2.33e-14	4.99999e-11	-1.3e-11	1.06e-12	4.99947e-11
	0.86	1.86e-12	5.57e-13	4.99972e-11	-1.28e-11	3.1e-13	4.99984e-11
	0.86	1.83e-12	1.24e-12	4.99938e-11	-1.31e-11	-2.87e-14	5.00001e-11
	0.86	1.78e-12	1.59e-12	4.99921e-11	-1.36e-11	-3.68e-13	5.00018e-11
	0.86	1.68e-12	1.82e-12	4.99909e-11	-1.39e-11	-8.43e-13	5.00042e-11
	0.86	1.64e-12	2.08e-12	4.99896e-11	-1.37e-11	-7.07e-13	5.00035e-11
	0.86	1.74e-12	2.2e-12	4.9989e-11	-1.37e-11	-7.07e-13	5.00035e-11
	0.86	1.87e-12	1.4e-12	4.9993e-11	-1.47e-11	3.91e-14	4.99998e-11
	0.86	1.86e-12	6.72e-13	4.99966e-11	-1.52e-11	8.53e-13	4.99957e-11
	0.86	1.78e-12	-2.44e-13	5.00012e-11	-1.52e-11	1.06e-12	4.99947e-11
	0.86	1.71e-12	-1.16e-12	5.00058e-11	-1.49e-11	4.46e-13	4.99978e-11
	0.86	1.61e-12	-1.92e-12	5.00096e-11	-1.51e-11	-1.64e-13	5.00008e-11
	0.86	1.61e-12	-2.04e-12	5.00102e-11	-1.52e-11	-2.32e-13	5.00012e-11
	0.86	1.62e-12	-2.27e-12	5.00114e-11	-1.47e-11	-8.43e-13	5.00042e-11
	0.86	1.73e-12	-2e-12	5.001e-11	-1.47e-11	-1.05e-12	5.00053e-11
	0.86	1.8e-12	-1.39e-12	5.0007e-11	-1.49e-11	-6.39e-13	5.00032e-11
	0.861	1.8e-12	-8.92e-13	5.00045e-11	-1.48e-11	-1.64e-13	5.00008e-11
	0.861	1.71e-12	-9.12e-14	5.00005e-11	-1.42e-11	8.53e-13	4.99957e-11
	0.861	1.61e-12	7.1e-13	4.99965e-11	-1.39e-11	1.26e-12	4.99937e-11
	0.861	1.51e-12	1.47e-12	4.99927e-11	-1.37e-11	8.53e-13	4.99957e-11
	0.861	1.63e-12	1.93e-12	4.99904e-11	-1.35e-11	1.07e-13	4.99995e-11
	0.861	1.71e-12	2.08e-12	4.99896e-11	-1.39e-11	-3e-13	5.00015e-11
	0.861	1.74e-12	2.01e-12	4.999e-11	-1.36e-11	-7.07e-13	5.00035e-11
	0.861	1.6e-12	1.7e-12	4.99915e-11	-1.34e-11	-9.78e-13	5.00049e-11
	0.861	1.63e-12	9.77e-13	4.99951e-11	-1.35e-11	-9.78e-13	5.00049e-11
	0.861	1.65e-12	-5.3e-14	5.00003e-11	-1.32e-11	-3.68e-13	5.00018e-11
	0.861	1.7e-12	-1.08e-12	5.00054e-11	-1.38e-11	1.75e-13	4.99991e-11
	0.861	1.67e-12	-2e-12	5.001e-11	-1.41e-11	7.85e-13	4.99961e-11
	0.861	1.57e-12	-2.34e-12	5.00117e-11	-1.42e-11	9.89e-13	4.99951e-11
	0.861	1.58e-12	-2.38e-12	5.00119e-11	-1.35e-11	5.14e-13	4.99974e-11
	0.861	1.68e-12	-2.15e-12	5.00108e-11	-1.32e-11	-1.64e-13	5.00008e-11
	0.861	1.8e-12	-1.66e-12	5.00083e-11	-1.29e-11	-5.03e-13	5.00025e-11
	0.861	1.74e-12	-9.69e-13	5.00048e-11	-1.24e-11	-7.75e-13	5.00039e-11
	0.861	1.62e-12	-2.44e-13	5.00012e-11	-1.24e-11	-9.1e-13	5.00046e-11
	0.861	1.56e-12	6.72e-13	4.99966e-11	-1.23e-11	-5.71e-13	5.00029e-11
	0.861	1.57e-12	1.36e-12	4.99932e-11	-1.22e-11	3.1e-13	4.99984e-11
	0.862	1.6e-12	1.89e-12	4.99906e-11	-1.18e-11	5.82e-13	4.99971e-11
	0.862	1.69e-12	2.43e-12	4.99878e-11	-1.21e-11	1.19e-12	4.9994e-11
	0.862	1.82e-12	2.39e-12	4.9988e-11	-1.27e-11	9.21e-13	4.99954e-11
	0.862	1.7e-12	2.08e-12	4.99896e-11	-1.26e-11	3.91e-14	4.99998e-11
	0.862	1.64e-12	1.78e-12	4.99911e-11	-1.17e-11	-2.32e-13	5.00012e-11
	0.862	1.65e-12	8.63e-13	4.99957e-11	-1.1e-11	-7.75e-13	5.00039e-11
	0.862	1.67e-12	-5.3e-14	5.00003e-11	-1.09e-11	-8.43e-13	5.00042e-11
	0.862	1.66e-12	-1.04e-12	5.00052e-11	-1.07e-11	-9.1e-13	5.00046e-11
	0.862	1.62e-12	-1.96e-12	5.00098e-11	-1.05e-11	3.91e-14	4.99998e-11
	0.862	1.61e-12	-2.42e-12	5.00121e-11	-1.04e-11	7.85e-13	4.99961e-11
	0.862	1.54e-12	-2.49e-12	5.00125e-11	-1.05e-11	1.06e-12	4.99947e-11
	0.862	1.53e-12	-2.23e-12	5.00112e-11	-1.01e-11	1.19e-12	4.9994e-11
	0.862	1.67e-12	-1.62e-12	5.00081e-11	-1.01e-11	2.43e-13	4.99988e-11
	0.862	1.77e-12	-7.4e-13	5.00037e-11	-1.04e-11	-9.66e-14	5.00005e-11
	0.862	1.74e-12	-1.49e-14	5.00001e-11	-9.96e-12	-5.71e-13	5.00029e-11
	0.862	1.54e-12	8.63e-13	4.99957e-11	-9.74e-12	-8.43e-13	5.00042e-11
	0.862	1.49e-12	1.82e-12	4.99909e-11	-9.61e-12	-9.78e-13	5.00049e-11
	0.862	1.6e-12	2.12e-12	4.99894e-11	-8.62e-12	-7.75e-13	5.00039e-11
	0.862	1.68e-12	2.39e-12	4.9988e-11	-8.79e-12	4.46e-13	4.99978e-11
	0.862	1.67e-12	2.27e-12	4.99887e-11	-9.33e-12	1.19e-12	4.9994e-11
	0.863	1.62e-12	2.08e-12	4.99896e-11	-9.19e-12	1.46e-12	4.99927e-11
	0.863	1.7e-12	1.05e-12	4.99948e-11	-8.63e-12	8.53e-13	4.99957e-11
	0.863	1.71e-12	1.38e-13	4.99993e-11	-8.49e-12	-9.66e-14	5.00005e-11
	0.863	1.58e-12	-8.16e-13	5.00041e-11	-8.11e-12	-5.03e-13	5.00025e-11
	0.863	1.42e-12	-1.35e-12	5.00068e-11	-7.68e-12	-9.78e-13	5.00049e-11
	0.863	1.47e-12	-1.96e-12	5.00098e-11	-7.45e-12	-1.18e-12	5.00059e-11
	0.863	1.7e-12	-2.27e-12	5.00114e-11	-7.23e-12	-7.75e-13	5.00039e-11
	0.863	1.72e-12	-2.27e-12	5.00114e-11	-7.68e-12	-3.68e-13	5.00018e-11
	0.863	1.69e-12	-1.92e-12	5.00096e-11	-7.23e-12	5.82e-13	4.99971e-11
	0.863	1.61e-12	-1.12e-12	5.00056e-11	-6.97e-12	1.26e-12	4.99937e-11
	0.863	1.6e-12	-5.11e-13	5.00026e-11	-7.72e-12	9.21e-13	4.99954e-11
	0.863	1.58e-12	4.05e-13	4.9998e-11	-8.03e-12	6.49e-13	4.99968e-11
	0.863	1.65e-12	1.13e-12	4.99944e-11	-7.99e-12	-4.36e-13	5.00022e-11
	0.863	1.63e-12	1.7e-12	4.99915e-11	-7.3e-12	-9.1e-13	5.00046e-11
	0.863	1.52e-12	2.27e-12	4.99887e-11	-6.99e-12	-1.25e-12	5.00063e-11
	0.863	1.53e-12	2.31e-12	4.99885e-11	-7.6e-12	-1.05e-12	5.00053e-11
	0.863	1.54e-12	2.27e-12	4.99887e-11	-7.63e-12	-1.64e-13	5.00008e-11
	0.863	1.64e-12	1.82e-12	4.99909e-11	-7.34e-12	3.78e-13	4.99981e-11
	0.863	1.72e-12	7.48e-13	4.99963e-11	-7.72e-12	1.26e-12	4.99937e-11
	0.863	1.64e-12	-1.49e-14	5.00001e-11	-7.42e-12	1.19e-12	4.9994e-11
	0.864	1.54e-12	-8.16e-13	5.00041e-11	-7.63e-12	3.1e-13	4.99984e-11
	0.864	1.61e-12	-1.77e-12	5.00088e-11	-7.98e-12	-9.66e-14	5.00005e-11
	0.864	1.7e-12	-2.27e-12	5.00114e-11	-7.29e-12	-7.07e-13	5.00035e-11
	0.864	1.6e-12	-2.46e-12	5.00123e-11	-7.42e-12	-9.1e-13	5.00046e-11
	0.864	1.56e-12	-2.23e-12	5.00112e-11	-7.6e-12	-1.11e-12	5.00056e-11
	0.864	1.63e-12	-1.66e-12	5.00083e-11	-7.46e-12	-6.39e-13	5.00032e-11
	0.864	1.63e-12	-7.4e-13	5.00037e-11	-8.15e-12	3.78e-13	4.99981e-11
	0.864	1.59e-12	-1.67e-13	5.00008e-11	-8.66e-12	8.53e-13	4.99957e-11
	0.864	1.56e-12	7.1e-13	4.99965e-11	-9.27e-12	1.46e-12	4.99927e-11
	0.864	1.56e-12	1.55e-12	4.99922e-11	-9.99e-12	9.89e-13	4.99951e-11
	0.864	1.56e-12	2.01e-12	4.999e-11	-1.01e-11	-9.66e-14	5.00005e-11
	0.864	1.64e-12	2.2e-12	4.9989e-11	-1.02e-11	-3e-13	5.00015e-11
	0.864	1.61e-12	2.05e-12	4.99898e-11	-9.81e-12	-9.1e-13	5.00046e-11
	0.864	1.59e-12	1.85e-12	4.99908e-11	-1.05e-11	-1.25e-12	5.00063e-11
	0.864	1.6e-12	1.21e-12	4.99939e-11	-1.12e-11	-1.05e-12	5.00053e-11
	0.864	1.59e-12	2.9e-13	4.99986e-11	-1.09e-11	-1.64e-13	5.00008e-11
	0.864	1.61e-12	-5.11e-13	5.00026e-11	-1.1e-11	7.85e-13	4.99961e-11
	0.864	1.54e-12	-1.43e-12	5.00071e-11	-1.11e-11	1.46e-12	4.99927e-11
	0.864	1.63e-12	-2.15e-12	5.00108e-11	-1.1e-11	1.26e-12	4.99937e-11
	0.864	1.67e-12	-2.38e-12	5.00119e-11	-1.11e-11	5.82e-13	4.99971e-11
	0.865	1.64e-12	-2.3e-12	5.00115e-11	-1.11e-11	-2.32e-13	5.00012e-11
	0.865	1.48e-12	-1.81e-12	5.00091e-11	-1.1e-11	-8.43e-13	5.00042e-11
	0.865	1.43e-12	-1.01e-12	5.00051e-11	-1.16e-11	-1.11e-12	5.00056e-11
	0.865	1.61e-12	-2.82e-13	5.00014e-11	-1.15e-11	-1.11e-12	5.00056e-11
	0.865	1.64e-12	5.57e-13	4.99972e-11	-1.13e-11	-5.03e-13	5.00025e-11
	0.865	1.6e-12	1.17e-12	4.99942e-11	-1.09e-11	7.17e-13	4.99964e-11
	0.865	1.54e-12	1.85e-12	4.99908e-11	-1.11e-11	1.26e-12	4.99937e-11
	0.865	1.54e-12	2.12e-12	4.99894e-11	-1.09e-11	1.46e-12	4.99927e-11
	0.865	1.51e-12	2.35e-12	4.99883e-11	-1.04e-11	7.85e-13	4.99961e-11
	0.865	1.58e-12	2.2e-12	4.9989e-11	-9.74e-12	-1.64e-13	5.00008e-11
	0.865	1.64e-12	1.93e-12	4.99904e-11	-9.23e-12	-4.36e-13	5.00022e-11
	0.865	1.56e-12	9.77e-13	4.99951e-11	-9.25e-12	-1.39e-12	5.0007e-11
	0.865	1.49e-12	-9.12e-14	5.00005e-11	-9.96e-12	-1.45e-12	5.00072e-11
	0.865	1.42e-12	-1.08e-12	5.00054e-11	-9.81e-12	-8.43e-13	5.00042e-11
	0.865	1.45e-12	-2e-12	5.001e-11	-9.44e-12	-2.87e-14	5.00001e-11
	0.865	1.48e-12	-2.57e-12	5.00129e-11	-8.95e-12	1.19e-12	4.9994e-11
	0.865	1.52e-12	-2.53e-12	5.00127e-11	-8.87e-12	1.67e-12	4.99917e-11
	0.865	1.48e-12	-2.34e-12	5.00117e-11	-9.16e-12	1.06e-12	4.99947e-11
	0.865	1.48e-12	-1.73e-12	5.00086e-11	-9.08e-12	1.75e-13	4.99991e-11
	0.865	1.61e-12	-7.02e-13	5.00035e-11	-8.72e-12	-7.07e-13	5.00035e-11
	0.866	1.64e-12	-1.49e-14	5.00001e-11	-8.03e-12	-9.78e-13	5.00049e-11
	0.866	1.52e-12	4.81e-13	4.99976e-11	-8.06e-12	-1.32e-12	5.00066e-11
	0.866	1.47e-12	1.4e-12	4.9993e-11	-8.17e-12	-1.05e-12	5.00053e-11
	0.866	1.45e-12	2.05e-12	4.99898e-11	-7.86e-12	-2.32e-13	5.00012e-11
	0.866	1.48e-12	2.27e-12	4.99887e-11	-7.73e-12	8.53e-13	4.99957e-11
	0.866	1.45e-12	2.35e-12	4.99883e-11	-7.79e-12	1.73e-12	4.99914e-11
	0.866	1.4e-12	1.89e-12	4.99906e-11	-8.48e-12	1.46e-12	4.99927e-11
	0.866	1.48e-12	1.28e-12	4.99936e-11	-8.66e-12	8.53e-13	4.99957e-11
	0.866	1.41e-12	4.81e-13	4.99976e-11	-8.93e-12	-2.32e-13	5.00012e-11
	0.866	1.48e-12	-4.34e-13	5.00022e-11	-9.46e-12	-1.05e-12	5.00053e-11
	0.866	1.54e-12	-1.43e-12	5.00071e-11	-9.86e-12	-1.59e-12	5.0008e-11
	0.866	1.47e-12	-2.07e-12	5.00103e-11	-1.06e-11	-1.32e-12	5.00066e-11
	0.866	1.46e-12	-2.38e-12	5.00119e-11	-1.03e-11	-8.43e-13	5.00042e-11
	0.866	1.49e-12	-2.38e-12	5.00119e-11	-1.05e-11	4.46e-13	4.99978e-11
	0.866	1.42e-12	-2.19e-12	5.0011e-11	-1.02e-11	1.4e-12	4.9993e-11
	0.866	1.48e-12	-1.43e-12	5.00071e-11	-1.05e-11	1.8e-12	4.9991e-11
	0.866	1.56e-12	-6.25e-13	5.00031e-11	-1.09e-11	1.26e-12	4.99937e-11
	0.866	1.52e-12	1.76e-13	4.99991e-11	-1.14e-11	1.75e-13	4.99991e-11
	0.866	1.38e-12	8.63e-13	4.99957e-11	-1.16e-11	-5.03e-13	5.00025e-11
	0.866	1.41e-12	1.85e-12	4.99908e-11	-1.11e-11	-1.25e-12	5.00063e-11
	0.867	1.54e-12	2.24e-12	4.99888e-11	-1.12e-11	-1.39e-12	5.0007e-11
	0.867	1.58e-12	2.12e-12	4.99894e-11	-1.11e-11	-1.11e-12	5.00056e-11
	0.867	1.5e-12	2.24e-12	4.99888e-11	-1.11e-11	3.91e-14	4.99998e-11
	0.867	1.5e-12	1.93e-12	4.99904e-11	-1e-11	9.21e-13	4.99954e-11
	0.867	1.38e-12	1.09e-12	4.99946e-11	-1e-11	1.53e-12	4.99923e-11
	0.867	1.33e-12	2.9e-13	4.99986e-11	-9.84e-12	1.53e-12	4.99923e-11
	0.867	1.42e-12	-7.02e-13	5.00035e-11	-9.25e-12	5.82e-13	4.99971e-11
	0.867	1.51e-12	-1.81e-12	5.00091e-11	-9.46e-12	-3.68e-13	5.00018e-11
	0.867	1.5e-12	-2.34e-12	5.00117e-11	-9.74e-12	-1.25e-12	5.00063e-11
	0.867	1.45e-12	-2.46e-12	5.00123e-11	-9.85e-12	-1.59e-12	5.0008e-11
	0.867	1.54e-12	-2.23e-12	5.00112e-11	-9.81e-12	-1.11e-12	5.00056e-11
	0.867	1.56e-12	-1.85e-12	5.00093e-11	-9.73e-12	-3e-13	5.00015e-11
	0.867	1.48e-12	-1.16e-12	5.00058e-11	-9.23e-12	5.82e-13	4.99971e-11
	0.867	1.39e-12	-9.12e-14	5.00005e-11	-9.31e-12	1.53e-12	4.99923e-11
	0.867	1.42e-12	7.48e-13	4.99963e-11	-9.69e-12	1.67e-12	4.99917e-11
	0.867	1.41e-12	1.36e-12	4.99932e-11	-9.86e-12	8.53e-13	4.99957e-11
	0.867	1.41e-12	1.74e-12	4.99913e-11	-1.01e-11	1.75e-13	4.99991e-11
	0.867	1.41e-12	1.97e-12	4.99902e-11	-9.39e-12	-1.11e-12	5.00056e-11
	0.867	1.43e-12	2.08e-12	4.99896e-11	-9.63e-12	-1.66e-12	5.00083e-11
	0.867	1.46e-12	1.78e-12	4.99911e-11	-9.7e-12	-1.52e-12	5.00076e-11
	0.868	1.51e-12	1.32e-12	4.99934e-11	-9.75e-12	-7.75e-13	5.00039e-11
	0.868	1.5e-12	5.57e-13	4.99972e-11	-9.8e-12	3.91e-14	4.99998e-11
	0.868	1.5e-12	-4.73e-13	5.00024e-11	-1.05e-11	1.06e-12	4.99947e-11
	0.868	1.39e-12	-1.2e-12	5.0006e-11	-9.94e-12	1.73e-12	4.99914e-11
	0.868	1.35e-12	-2e-12	5.001e-11	-1.02e-11	1.33e-12	4.99934e-11
	0.868	1.38e-12	-2.23e-12	5.00112e-11	-1.01e-11	1.75e-13	4.99991e-11
	0.868	1.48e-12	-2.23e-12	5.00112e-11	-9.62e-12	-5.03e-13	5.00025e-11
	0.868	1.55e-12	-1.96e-12	5.00098e-11	-9.9e-12	-1.45e-12	5.00072e-11
	0.868	1.51e-12	-1.31e-12	5.00066e-11	-9.24e-12	-1.72e-12	5.00086e-11
	0.868	1.44e-12	-5.49e-13	5.00027e-11	-9.06e-12	-9.1e-13	5.00046e-11
	0.868	1.48e-12	2.9e-13	4.99986e-11	-9.54e-12	-4.36e-13	5.00022e-11
	0.868	1.55e-12	1.02e-12	4.99949e-11	-9.21e-12	7.17e-13	4.99964e-11
	0.868	1.52e-12	1.63e-12	4.99919e-11	-9.35e-12	1.67e-12	4.99917e-11
	0.868	1.48e-12	1.97e-12	4.99902e-11	-9.78e-12	1.94e-12	4.99903e-11
	0.868	1.54e-12	2.27e-12	4.99887e-11	-1e-11	1.12e-12	4.99944e-11
	0.868	1.45e-12	2.2e-12	4.9989e-11	-1.01e-11	-9.66e-14	5.00005e-11
	0.868	1.41e-12	1.7e-12	4.99915e-11	-9.86e-12	-1.18e-12	5.00059e-11
	0.868	1.36e-12	1.05e-12	4.99948e-11	-9.54e-12	-1.59e-12	5.0008e-11
	0.868	1.58e-12	9.96e-14	4.99995e-11	-9.42e-12	-1.72e-12	5.00086e-11
	0.868	1.58e-12	-1.08e-12	5.00054e-11	-9.7e-12	-9.78e-13	5.00049e-11
	0.869	1.46e-12	-1.69e-12	5.00085e-11	-9.39e-12	1.07e-13	4.99995e-11
	0.869	1.46e-12	-2.3e-12	5.00115e-11	-9.4e-12	1.4e-12	4.9993e-11
	0.869	1.52e-12	-2.34e-12	5.00117e-11	-9.01e-12	1.8e-12	4.9991e-11
	0.869	1.55e-12	-2.42e-12	5.00121e-11	-8.89e-12	1.33e-12	4.99934e-11
	0.869	1.63e-12	-1.69e-12	5.00085e-11	-8.98e-12	2.43e-13	4.99988e-11
	0.869	1.61e-12	-1.12e-12	5.00056e-11	-9.65e-12	-8.43e-13	5.00042e-11
	0.869	1.46e-12	-1.67e-13	5.00008e-11	-1.03e-11	-1.45e-12	5.00072e-11
	0.869	1.46e-12	7.1e-13	4.99965e-11	-1.02e-11	-1.72e-12	5.00086e-11
	0.869	1.51e-12	1.17e-12	4.99942e-11	-9.31e-12	-1.18e-12	5.00059e-11
	0.869	1.54e-12	1.85e-12	4.99908e-11	-9.1e-12	-9.66e-14	5.00005e-11
	0.869	1.48e-12	2.12e-12	4.99894e-11	-9.39e-12	9.21e-13	4.99954e-11
	0.869	1.43e-12	2.24e-12	4.99888e-11	-1.07e-11	1.8e-12	4.9991e-11
	0.869	1.47e-12	1.97e-12	4.99902e-11	-1.08e-11	1.4e-12	4.9993e-11
	0.869	1.54e-12	1.7e-12	4.99915e-11	-1.06e-11	7.85e-13	4.99961e-11
	0.869	1.55e-12	5.95e-13	4.9997e-11	-1.07e-11	-2.32e-13	5.00012e-11
	0.869	1.44e-12	-2.82e-13	5.00014e-11	-1.12e-11	-1.52e-12	5.00076e-11
	0.869	1.42e-12	-1.04e-12	5.00052e-11	-1.14e-11	-1.79e-12	5.0009e-11
	0.869	1.45e-12	-1.66e-12	5.00083e-11	-1.15e-11	-1.72e-12	5.00086e-11
	0.869	1.38e-12	-2.57e-12	5.00129e-11	-1.15e-11	-5.71e-13	5.00029e-11
	0.869	1.39e-12	-2.57e-12	5.00129e-11	-1.16e-11	4.46e-13	4.99978e-11
	0.87	1.5e-12	-2.15e-12	5.00108e-11	-1.25e-11	1.67e-12	4.99917e-11
	0.87	1.48e-12	-1.58e-12	5.00079e-11	-1.24e-11	1.94e-12	4.99903e-11
	0.87	1.38e-12	-5.87e-13	5.00029e-11	-1.19e-11	1.26e-12	4.99937e-11
	0.87	1.48e-12	2.33e-14	4.99999e-11	-1.19e-11	2.43e-13	4.99988e-11
	0.87	1.53e-12	7.1e-13	4.99965e-11	-1.19e-11	-9.78e-13	5.00049e-11
	0.87	1.45e-12	1.55e-12	4.99922e-11	-1.24e-11	-1.66e-12	5.00083e-11
	0.87	1.36e-12	2.12e-12	4.99894e-11	-1.22e-11	-1.79e-12	5.0009e-11
	0.87	1.35e-12	2.31e-12	4.99885e-11	-1.17e-11	-1.25e-12	5.00063e-11
	0.87	1.35e-12	2.35e-12	4.99883e-11	-1.11e-11	1.75e-13	4.99991e-11
	0.87	1.41e-12	1.93e-12	4.99904e-11	-1.12e-11	1.19e-12	4.9994e-11
	0.87	1.51e-12	1.43e-12	4.99929e-11	-1.1e-11	2.07e-12	4.99897e-11
	0.87	1.41e-12	4.43e-13	4.99978e-11	-1.09e-11	1.6e-12	4.9992e-11
	0.87	1.35e-12	-6.25e-13	5.00031e-11	-1.07e-11	9.21e-13	4.99954e-11
	0.87	1.46e-12	-1.46e-12	5.00073e-11	-1.05e-11	-4.36e-13	5.00022e-11
	0.87	1.51e-12	-2.27e-12	5.00114e-11	-9.74e-12	-1.52e-12	5.00076e-11
	0.87	1.38e-12	-2.46e-12	5.00123e-11	-9.69e-12	-2.06e-12	5.00103e-11
	0.87	1.32e-12	-2.38e-12	5.00119e-11	-9.85e-12	-1.25e-12	5.00063e-11
	0.87	1.32e-12	-1.96e-12	5.00098e-11	-8.75e-12	-5.03e-13	5.00025e-11
	0.87	1.37e-12	-1.31e-12	5.00066e-11	-8.94e-12	8.53e-13	4.99957e-11
	0.87	1.35e-12	-2.82e-13	5.00014e-11	-9.78e-12	2.07e-12	4.99897e-11
	0.871	1.46e-12	1.76e-13	4.99991e-11	-9.52e-12	1.94e-12	4.99903e-11
	0.871	1.45e-12	9.01e-13	4.99955e-11	-9.23e-12	1.26e-12	4.99937e-11
	0.871	1.41e-12	1.47e-12	4.99927e-11	-8.81e-12	-2.32e-13	5.00012e-11
	0.871	1.33e-12	1.89e-12	4.99906e-11	-8.67e-12	-9.1e-13	5.00046e-11
	0.871	1.35e-12	2.2e-12	4.9989e-11	-8.95e-12	-1.59e-12	5.0008e-11
	0.871	1.45e-12	2.12e-12	4.99894e-11	-8.18e-12	-1.72e-12	5.00086e-11
	0.871	1.48e-12	1.78e-12	4.99911e-11	-7.98e-12	-7.75e-13	5.00039e-11
	0.871	1.42e-12	8.24e-13	4.99959e-11	-7.53e-12	4.46e-13	4.99978e-11
	0.871	1.32e-12	-1.49e-14	5.00001e-11	-7.77e-12	1.53e-12	4.99923e-11
	0.871	1.19e-12	-8.16e-13	5.00041e-11	-7.95e-12	2.07e-12	4.99897e-11
	0.871	1.35e-12	-1.58e-12	5.00079e-11	-7.29e-12	1.46e-12	4.99927e-11
	0.871	1.42e-12	-2.07e-12	5.00103e-11	-7.3e-12	3.1e-13	4.99984e-11
	0.871	1.47e-12	-2.38e-12	5.00119e-11	-7.69e-12	-7.07e-13	5.00035e-11
	0.871	1.4e-12	-2.23e-12	5.00112e-11	-7.67e-12	-1.66e-12	5.00083e-11
	0.871	1.43e-12	-1.5e-12	5.00075e-11	-7.49e-12	-2.06e-12	5.00103e-11
	0.871	1.47e-12	-7.78e-13	5.00039e-11	-7.42e-12	-1.45e-12	5.00072e-11
	0.871	1.44e-12	6.14e-14	4.99997e-11	-7.64e-12	-2.32e-13	5.00012e-11
	0.871	1.41e-12	4.81e-13	4.99976e-11	-7.08e-12	1.06e-12	4.99947e-11
	0.871	1.31e-12	1.32e-12	4.99934e-11	-7.49e-12	2.07e-12	4.99897e-11
	0.871	1.25e-12	1.93e-12	4.99904e-11	-7.91e-12	1.87e-12	4.99907e-11
	0.872	1.38e-12	2.2e-12	4.9989e-11	-7.45e-12	1.12e-12	4.99944e-11
	0.872	1.46e-12	2.05e-12	4.99898e-11	-7.38e-12	-3e-13	5.00015e-11
	0.872	1.39e-12	1.7e-12	4.99915e-11	-7.03e-12	-1.39e-12	5.0007e-11
	0.872	1.42e-12	1.36e-12	4.99932e-11	-6.42e-12	-1.86e-12	5.00093e-11
	0.872	1.48e-12	3.28e-13	4.99984e-11	-6.02e-12	-1.72e-12	5.00086e-11
	0.872	1.54e-12	-6.25e-13	5.00031e-11	-5.86e-12	-7.75e-13	5.00039e-11
	0.872	1.44e-12	-1.39e-12	5.0007e-11	-6.34e-12	3.1e-13	4.99984e-11
	0.872	1.39e-12	-2.07e-12	5.00103e-11	-7.06e-12	1.53e-12	4.99923e-11
	0.872	1.52e-12	-2.46e-12	5.00123e-11	-6.73e-12	2.14e-12	4.99893e-11
	0.872	1.44e-12	-2.42e-12	5.00121e-11	-6.91e-12	1.73e-12	4.99914e-11
	0.872	1.36e-12	-1.92e-12	5.00096e-11	-6.72e-12	5.14e-13	4.99974e-11
	0.872	1.48e-12	-1.16e-12	5.00058e-11	-6.62e-12	-8.43e-13	5.00042e-11
	0.872	1.54e-12	-4.34e-13	5.00022e-11	-7.16e-12	-1.93e-12	5.00097e-11
	0.872	1.46e-12	2.52e-13	4.99987e-11	-7.87e-12	-2e-12	5.001e-11
	0.872	1.44e-12	1.09e-12	4.99946e-11	-8.3e-12	-1.39e-12	5.0007e-11
	0.872	1.45e-12	1.55e-12	4.99922e-11	-8.06e-12	-1.64e-13	5.00008e-11
	0.872	1.34e-12	1.93e-12	4.99904e-11	-7.91e-12	1.26e-12	4.99937e-11
	0.872	1.37e-12	2.27e-12	4.99887e-11	-8.47e-12	2.07e-12	4.99897e-11
	0.872	1.56e-12	2.16e-12	4.99892e-11	-8.81e-12	2.07e-12	4.99897e-11
	0.872	1.61e-12	1.78e-12	4.99911e-11	-8.67e-12	9.89e-13	4.99951e-11
	0.873	1.56e-12	8.24e-13	4.99959e-11	-9.19e-12	-4.36e-13	5.00022e-11
	0.873	1.51e-12	2.33e-14	4.99999e-11	-9.12e-12	-1.39e-12	5.0007e-11
	0.873	1.43e-12	-8.54e-13	5.00043e-11	-8.43e-12	-2.2e-12	5.0011e-11
	0.873	1.35e-12	-1.81e-12	5.00091e-11	-8.66e-12	-1.66e-12	5.00083e-11
	0.873	1.47e-12	-2.19e-12	5.0011e-11	-8.29e-12	-5.03e-13	5.00025e-11
	0.873	1.54e-12	-2.61e-12	5.00131e-11	-8.82e-12	6.49e-13	4.99968e-11
	0.873	1.54e-12	-2.04e-12	5.00102e-11	-8.79e-12	2.14e-12	4.99893e-11
	0.873	1.48e-12	-1.66e-12	5.00083e-11	-8.18e-12	2.21e-12	4.9989e-11
	0.873	1.48e-12	-7.78e-13	5.00039e-11	-7.9e-12	1.73e-12	4.99914e-11
	0.873	1.54e-12	-9.12e-14	5.00005e-11	-8.17e-12	3.1e-13	4.99984e-11
	0.873	1.51e-12	5.95e-13	4.9997e-11	-8.7e-12	-1.11e-12	5.00056e-11
	0.873	1.4e-12	1.59e-12	4.99921e-11	-8.68e-12	-1.86e-12	5.00093e-11
	0.873	1.41e-12	2.08e-12	4.99896e-11	-8.32e-12	-2.47e-12	5.00124e-11
	0.873	1.47e-12	2.08e-12	4.99896e-11	-7.99e-12	-1.32e-12	5.00066e-11
	0.873	1.62e-12	2.08e-12	4.99896e-11	-7.37e-12	1.07e-13	4.99995e-11
	0.873	1.53e-12	2.08e-12	4.99896e-11	-7.53e-12	1.67e-12	4.99917e-11
	0.873	1.44e-12	1.36e-12	4.99932e-11	-7.53e-12	2.48e-12	4.99876e-11
	0.873	1.57e-12	5.95e-13	4.9997e-11	-7.18e-12	2.07e-12	4.99897e-11
	0.873	1.62e-12	-5.11e-13	5.00026e-11	-7.06e-12	9.21e-13	4.99954e-11
	0.873	1.56e-12	-1.31e-12	5.00066e-11	-6.74e-12	-3.68e-13	5.00018e-11
	0.874	1.42e-12	-2e-12	5.001e-11	-6.43e-12	-1.66e-12	5.00083e-11
	0.874	1.51e-12	-2.3e-12	5.00115e-11	-7.22e-12	-2.13e-12	5.00107e-11
	0.874	1.58e-12	-2.3e-12	5.00115e-11	-7.33e-12	-1.72e-12	5.00086e-11
	0.874	1.61e-12	-2.07e-12	5.00103e-11	-7.07e-12	-4.36e-13	5.00022e-11
	0.874	1.48e-12	-1.31e-12	5.00066e-11	-7.12e-12	9.21e-13	4.99954e-11
	0.874	1.48e-12	-7.02e-13	5.00035e-11	-7.31e-12	2.07e-12	4.99897e-11
	0.874	1.54e-12	9.96e-14	4.99995e-11	-7.39e-12	2.14e-12	4.99893e-11
	0.874	1.57e-12	6.72e-13	4.99966e-11	-7.76e-12	1.46e-12	4.99927e-11
	0.874	1.56e-12	1.4e-12	4.9993e-11	-7.44e-12	1.75e-13	4.99991e-11
	0.874	1.58e-12	2.01e-12	4.999e-11	-7.41e-12	-1.11e-12	5.00056e-11
	0.874	1.56e-12	2.12e-12	4.99894e-11	-7.82e-12	-2e-12	5.001e-11
	0.874	1.47e-12	2.2e-12	4.9989e-11	-7.65e-12	-2e-12	5.001e-11
	0.874	1.37e-12	1.97e-12	4.99902e-11	-6.97e-12	-9.1e-13	5.00046e-11
	0.874	1.46e-12	1.24e-12	4.99938e-11	-6.93e-12	3.1e-13	4.99984e-11
	0.874	1.48e-12	5.19e-13	4.99974e-11	-6.99e-12	1.53e-12	4.99923e-11
	0.874	1.58e-12	-7.02e-13	5.00035e-11	-7.58e-12	1.94e-12	4.99903e-11
	0.874	1.57e-12	-1.43e-12	5.00071e-11	-7.2e-12	1.8e-12	4.9991e-11
	0.874	1.53e-12	-2e-12	5.001e-11	-7.1e-12	5.82e-13	4.99971e-11
	0.874	1.51e-12	-2.19e-12	5.0011e-11	-6.62e-12	-1.05e-12	5.00053e-11
	0.874	1.48e-12	-2.23e-12	5.00112e-11	-6.93e-12	-1.93e-12	5.00097e-11
	0.875	1.48e-12	-1.85e-12	5.00093e-11	-7.18e-12	-1.93e-12	5.00097e-11
	0.875	1.45e-12	-8.92e-13	5.00045e-11	-6.91e-12	-1.59e-12	5.0008e-11
	0.875	1.49e-12	-1.29e-13	5.00006e-11	-6.5e-12	-9.66e-14	5.00005e-11
	0.875	1.46e-12	6.34e-13	4.99968e-11	-5.65e-12	1.19e-12	4.9994e-11
	0.875	1.44e-12	1.21e-12	4.99939e-11	-6.02e-12	2.28e-12	4.99886e-11
	0.875	1.47e-12	1.78e-12	4.99911e-11	-6.58e-12	2.07e-12	4.99897e-11
	0.875	1.63e-12	2.01e-12	4.999e-11	-7.07e-12	8.53e-13	4.99957e-11
	0.875	1.52e-12	1.89e-12	4.99906e-11	-6.99e-12	-2.32e-13	5.00012e-11
	0.875	1.36e-12	1.82e-12	4.99909e-11	-6.49e-12	-1.32e-12	5.00066e-11
	0.875	1.42e-12	1.36e-12	4.99932e-11	-7.31e-12	-1.93e-12	5.00097e-11
	0.875	1.51e-12	5.95e-13	4.9997e-11	-6.84e-12	-1.79e-12	5.0009e-11
	0.875	1.49e-12	-1.29e-13	5.00006e-11	-6.65e-12	-1.05e-12	5.00053e-11
	0.875	1.51e-12	-1.08e-12	5.00054e-11	-6.95e-12	9.21e-13	4.99954e-11
	0.875	1.48e-12	-1.88e-12	5.00094e-11	-6.62e-12	1.87e-12	4.99907e-11
	0.875	1.43e-12	-2.07e-12	5.00103e-11	-6.5e-12	2.21e-12	4.9989e-11
	0.875	1.43e-12	-2.27e-12	5.00114e-11	-5.31e-12	1.73e-12	4.99914e-11
	0.875	1.53e-12	-1.77e-12	5.00088e-11	-5.2e-12	3.1e-13	4.99984e-11
	0.875	1.6e-12	-1.46e-12	5.00073e-11	-5.75e-12	-1.05e-12	5.00053e-11
	0.875	1.53e-12	-6.25e-13	5.00031e-11	-5.46e-12	-1.66e-12	5.00083e-11
	0.875	1.49e-12	9.96e-14	4.99995e-11	-6.02e-12	-2e-12	5.001e-11
	0.876	1.53e-12	7.1e-13	4.99965e-11	-6.13e-12	-1.52e-12	5.00076e-11
	0.876	1.63e-12	1.47e-12	4.99927e-11	-6.12e-12	3.91e-14	4.99998e-11
	0.876	1.57e-12	1.97e-12	4.99902e-11	-6e-12	1.33e-12	4.99934e-11
	0.876	1.57e-12	2.01e-12	4.999e-11	-6.39e-12	1.94e-12	4.99903e-11
	0.876	1.49e-12	2.08e-12	4.99896e-11	-6.55e-12	1.8e-12	4.9991e-11
	0.876	1.43e-12	1.82e-12	4.99909e-11	-6.66e-12	8.53e-13	4.99957e-11
	0.876	1.47e-12	1.28e-12	4.99936e-11	-7.16e-12	-3.68e-13	5.00018e-11
	0.876	1.44e-12	2.14e-13	4.99989e-11	-7.31e-12	-1.39e-12	5.0007e-11
	0.876	1.57e-12	-6.63e-13	5.00033e-11	-7.25e-12	-2.06e-12	5.00103e-11
	0.876	1.63e-12	-1.62e-12	5.00081e-11	-6.17e-12	-1.66e-12	5.00083e-11
	0.876	1.58e-12	-2.07e-12	5.00103e-11	-6.54e-12	-5.03e-13	5.00025e-11
	0.876	1.51e-12	-2.27e-12	5.00114e-11	-7.23e-12	8.53e-13	4.99957e-11
	0.876	1.56e-12	-2.19e-12	5.0011e-11	-7.38e-12	1.67e-12	4.99917e-11
	0.876	1.66e-12	-1.96e-12	5.00098e-11	-7.12e-12	2.07e-12	4.99897e-11
	0.876	1.54e-12	-1.12e-12	5.00056e-11	-6.65e-12	1.33e-12	4.99934e-11
	0.876	1.48e-12	-3.58e-13	5.00018e-11	-5.97e-12	1.75e-13	4.99991e-11
	0.876	1.48e-12	6.34e-13	4.99968e-11	-5.97e-12	-1.18e-12	5.00059e-11
	0.876	1.54e-12	1.17e-12	4.99942e-11	-6.11e-12	-2e-12	5.001e-11
	0.876	1.55e-12	1.78e-12	4.99911e-11	-6.51e-12	-1.93e-12	5.00097e-11
	0.876	1.58e-12	1.93e-12	4.99904e-11	-6.89e-12	-1.32e-12	5.00066e-11
	0.877	1.54e-12	2.08e-12	4.99896e-11	-7.06e-12	1.75e-13	4.99991e-11
	0.877	1.51e-12	1.93e-12	4.99904e-11	-6.99e-12	1.46e-12	4.99927e-11
	0.877	1.55e-12	1.51e-12	4.99924e-11	-7.02e-12	2.01e-12	4.999e-11
	0.877	1.67e-12	6.34e-13	4.99968e-11	-6.89e-12	1.73e-12	4.99914e-11
	0.877	1.65e-12	-4.34e-13	5.00022e-11	-6.85e-12	9.21e-13	4.99954e-11
	0.877	1.58e-12	-1.04e-12	5.00052e-11	-6.92e-12	-4.36e-13	5.00022e-11
	0.877	1.51e-12	-1.81e-12	5.00091e-11	-6.47e-12	-1.59e-12	5.0008e-11
	0.877	1.47e-12	-2.07e-12	5.00103e-11	-6.8e-12	-2.06e-12	5.00103e-11
	0.877	1.5e-12	-2.34e-12	5.00117e-11	-6.59e-12	-1.86e-12	5.00093e-11
	0.877	1.63e-12	-2.15e-12	5.00108e-11	-7.12e-12	-5.71e-13	5.00029e-11
	0.877	1.61e-12	-1.77e-12	5.00088e-11	-7.9e-12	7.85e-13	4.99961e-11
	0.877	1.5e-12	-1.01e-12	5.00051e-11	-7.54e-12	2.01e-12	4.999e-11
	0.877	1.48e-12	-5.3e-14	5.00003e-11	-7.11e-12	2.07e-12	4.99897e-11
	0.877	1.52e-12	8.24e-13	4.99959e-11	-7.31e-12	1.46e-12	4.99927e-11
	0.877	1.58e-12	1.36e-12	4.99932e-11	-7.19e-12	5.82e-13	4.99971e-11
	0.877	1.58e-12	1.89e-12	4.99906e-11	-7.16e-12	-1.25e-12	5.00063e-11
	0.877	1.59e-12	2.05e-12	4.99898e-11	-7.02e-12	-1.79e-12	5.0009e-11
	0.877	1.57e-12	2.05e-12	4.99898e-11	-6.68e-12	-2.2e-12	5.0011e-11
	0.877	1.52e-12	1.78e-12	4.99911e-11	-6.77e-12	-1.39e-12	5.0007e-11
	0.877	1.45e-12	1.21e-12	4.99939e-11	-6.76e-12	4.46e-13	4.99978e-11
	0.878	1.45e-12	3.67e-13	4.99982e-11	-6.12e-12	1.73e-12	4.99914e-11
	0.878	1.56e-12	-5.49e-13	5.00027e-11	-5.82e-12	2.28e-12	4.99886e-11
	0.878	1.58e-12	-1.24e-12	5.00062e-11	-6.11e-12	1.8e-12	4.9991e-11
	0.878	1.51e-12	-1.96e-12	5.00098e-11	-5.71e-12	4.46e-13	4.99978e-11
	0.878	1.43e-12	-2.07e-12	5.00103e-11	-5.79e-12	-4.36e-13	5.00022e-11
	0.878	1.53e-12	-2.04e-12	5.00102e-11	-5.32e-12	-1.86e-12	5.00093e-11
	0.878	1.64e-12	-1.69e-12	5.00085e-11	-4.93e-12	-1.93e-12	5.00097e-11
	0.878	1.54e-12	-1.24e-12	5.00062e-11	-4.87e-12	-1.66e-12	5.00083e-11
	0.878	1.54e-12	-6.25e-13	5.00031e-11	-5.14e-12	-2.32e-13	5.00012e-11
	0.878	1.45e-12	2.9e-13	4.99986e-11	-4.3e-12	1.06e-12	4.99947e-11
	0.878	1.49e-12	9.39e-13	4.99953e-11	-4.37e-12	1.94e-12	4.99903e-11
	0.878	1.52e-12	1.59e-12	4.99921e-11	-4.59e-12	1.94e-12	4.99903e-11
	0.878	1.54e-12	1.7e-12	4.99915e-11	-4.1e-12	1.33e-12	4.99934e-11
	0.878	1.45e-12	1.78e-12	4.99911e-11	-3.72e-12	-1.64e-13	5.00008e-11
	0.878	1.41e-12	1.89e-12	4.99906e-11	-4.15e-12	-1.32e-12	5.00066e-11
	0.878	1.61e-12	1.51e-12	4.99924e-11	-4.13e-12	-2.47e-12	5.00124e-11
	0.878	1.72e-12	8.24e-13	4.99959e-11	-4.53e-12	-2.33e-12	5.00116e-11
	0.878	1.58e-12	-5.3e-14	5.00003e-11	-4.83e-12	-1.05e-12	5.00053e-11
	0.878	1.63e-12	-6.63e-13	5.00033e-11	-4.52e-12	7.17e-13	4.99964e-11
	0.878	1.67e-12	-1.46e-12	5.00073e-11	-3.96e-12	1.73e-12	4.99914e-11
	0.879	1.59e-12	-2.04e-12	5.00102e-11	-4.64e-12	2.01e-12	4.999e-11
	0.879	1.41e-12	-2.34e-12	5.00117e-11	-4.94e-12	1.8e-12	4.9991e-11
	0.879	1.43e-12	-1.81e-12	5.00091e-11	-4.79e-12	5.82e-13	4.99971e-11
	0.879	1.45e-12	-1.35e-12	5.00068e-11	-5.28e-12	-1.11e-12	5.00056e-11
	0.879	1.55e-12	-8.54e-13	5.00043e-11	-5.67e-12	-1.86e-12	5.00093e-11
	0.879	1.6e-12	-1.49e-14	5.00001e-11	-6.38e-12	-2.06e-12	5.00103e-11
	0.879	1.64e-12	5.57e-13	4.99972e-11	-6.39e-12	-1.45e-12	5.00072e-11
	0.879	1.61e-12	1.28e-12	4.99936e-11	-6.47e-12	-1.64e-13	5.00008e-11
	0.879	1.54e-12	1.74e-12	4.99913e-11	-6.34e-12	1.46e-12	4.99927e-11
	0.879	1.64e-12	2.01e-12	4.999e-11	-6.43e-12	1.94e-12	4.99903e-11
	0.879	1.7e-12	1.85e-12	4.99908e-11	-6.57e-12	2.14e-12	4.99893e-11
	0.879	1.8e-12	1.59e-12	4.99921e-11	-6.58e-12	1.19e-12	4.9994e-11
	0.879	1.63e-12	9.39e-13	4.99953e-11	-6.57e-12	-1.64e-13	5.00008e-11
	0.879	1.43e-12	2.9e-13	4.99986e-11	-5.9e-12	-1.45e-12	5.00072e-11
	0.879	1.38e-12	-3.58e-13	5.00018e-11	-5.88e-12	-2.27e-12	5.00114e-11
	0.879	1.53e-12	-9.69e-13	5.00048e-11	-5.77e-12	-1.72e-12	5.00086e-11
	0.879	1.65e-12	-1.62e-12	5.00081e-11	-5.71e-12	-6.39e-13	5.00032e-11
	0.879	1.67e-12	-1.85e-12	5.00093e-11	-5.59e-12	6.49e-13	4.99968e-11
	0.879	1.67e-12	-2e-12	5.001e-11	-5.9e-12	2.14e-12	4.99893e-11
	0.879	1.74e-12	-1.66e-12	5.00083e-11	-6.01e-12	2.07e-12	4.99897e-11
	0.88	1.71e-12	-1.12e-12	5.00056e-11	-5.85e-12	1.33e-12	4.99934e-11
	0.88	1.64e-12	-4.34e-13	5.00022e-11	-5.59e-12	3.1e-13	4.99984e-11
	0.88	1.61e-12	2.52e-13	4.99987e-11	-5.24e-12	-1.05e-12	5.00053e-11
	0.88	1.64e-12	1.02e-12	4.99949e-11	-5.36e-12	-1.86e-12	5.00093e-11
	0.88	1.5e-12	1.47e-12	4.99927e-11	-5.52e-12	-2.13e-12	5.00107e-11
	0.88	1.54e-12	1.89e-12	4.99906e-11	-5.81e-12	-1.45e-12	5.00072e-11
	0.88	1.54e-12	1.78e-12	4.99911e-11	-6.12e-12	-2.87e-14	5.00001e-11
	0.88	1.67e-12	1.63e-12	4.99919e-11	-5.63e-12	1.67e-12	4.99917e-11
	0.88	1.67e-12	1.28e-12	4.99936e-11	-5.67e-12	2.14e-12	4.99893e-11
	0.88	1.66e-12	8.24e-13	4.99959e-11	-4.98e-12	1.8e-12	4.9991e-11
	0.88	1.58e-12	-5.3e-14	5.00003e-11	-4.83e-12	8.53e-13	4.99957e-11
	0.88	1.58e-12	-7.02e-13	5.00035e-11	-4.97e-12	-7.75e-13	5.00039e-11
	0.88	1.59e-12	-1.43e-12	5.00071e-11	-4.98e-12	-1.59e-12	5.0008e-11
	0.88	1.52e-12	-2e-12	5.001e-11	-4.28e-12	-2.2e-12	5.0011e-11
	0.88	1.53e-12	-2.04e-12	5.00102e-11	-4.03e-12	-1.86e-12	5.00093e-11
	0.88	1.62e-12	-2.07e-12	5.00103e-11	-3.69e-12	-3.68e-13	5.00018e-11
	0.88	1.55e-12	-1.54e-12	5.00077e-11	-3.64e-12	1.12e-12	4.99944e-11
	0.88	1.48e-12	-9.69e-13	5.00048e-11	-3.66e-12	1.94e-12	4.99903e-11
	0.88	1.5e-12	-5.3e-14	5.00003e-11	-3.66e-12	2.34e-12	4.99883e-11
	0.88	1.56e-12	5.57e-13	4.99972e-11	-3.58e-12	1.26e-12	4.99937e-11
	0.881	1.49e-12	1.28e-12	4.99936e-11	-3.81e-12	1.07e-13	4.99995e-11
	0.881	1.45e-12	1.78e-12	4.99911e-11	-3.14e-12	-1.18e-12	5.00059e-11
	0.881	1.52e-12	1.97e-12	4.99902e-11	-2.95e-12	-2.06e-12	5.00103e-11
	0.881	1.57e-12	1.93e-12	4.99904e-11	-2.67e-12	-2e-12	5.001e-11
	0.881	1.67e-12	1.7e-12	4.99915e-11	-3.03e-12	-1.18e-12	5.00059e-11
	0.881	1.56e-12	1.17e-12	4.99942e-11	-3.54e-12	2.43e-13	4.99988e-11
	0.881	1.42e-12	5.95e-13	4.9997e-11	-3.34e-12	1.4e-12	4.9993e-11
	0.881	1.38e-12	-1.67e-13	5.00008e-11	-2.78e-12	2.28e-12	4.99886e-11
	0.881	1.46e-12	-9.3e-13	5.00047e-11	-2.91e-12	2.07e-12	4.99897e-11
	0.881	1.51e-12	-1.35e-12	5.00068e-11	-3.01e-12	7.85e-13	4.99961e-11
	0.881	1.45e-12	-1.85e-12	5.00093e-11	-3.19e-12	-5.03e-13	5.00025e-11
	0.881	1.51e-12	-1.88e-12	5.00094e-11	-3.38e-12	-1.59e-12	5.0008e-11
	0.881	1.54e-12	-1.77e-12	5.00088e-11	-3.19e-12	-2.33e-12	5.00116e-11
	0.881	1.45e-12	-1.2e-12	5.0006e-11	-3.26e-12	-1.59e-12	5.0008e-11
	0.881	1.48e-12	-7.78e-13	5.00039e-11	-3.14e-12	-3e-13	5.00015e-11
	0.881	1.44e-12	1.38e-13	4.99993e-11	-3.34e-12	1.19e-12	4.9994e-11
	0.881	1.5e-12	6.34e-13	4.99968e-11	-3.56e-12	2.07e-12	4.99897e-11
	0.881	1.52e-12	1.17e-12	4.99942e-11	-3.79e-12	2.07e-12	4.99897e-11
	0.881	1.53e-12	1.59e-12	4.99921e-11	-3.69e-12	9.89e-13	4.99951e-11
	0.881	1.45e-12	1.78e-12	4.99911e-11	-2.53e-12	-9.66e-14	5.00005e-11
	0.882	1.54e-12	1.7e-12	4.99915e-11	-2.16e-12	-1.32e-12	5.00066e-11
	0.882	1.58e-12	1.4e-12	4.9993e-11	-2.65e-12	-2.2e-12	5.0011e-11
	0.882	1.51e-12	9.01e-13	4.99955e-11	-2.55e-12	-2.27e-12	5.00114e-11
	0.882	1.47e-12	1.38e-13	4.99993e-11	-3.15e-12	-9.78e-13	5.00049e-11
	0.882	1.45e-12	-4.34e-13	5.00022e-11	-2.74e-12	7.17e-13	4.99964e-11
	0.882	1.48e-12	-1.08e-12	5.00054e-11	-2.27e-12	1.87e-12	4.99907e-11
	0.882	1.48e-12	-1.73e-12	5.00086e-11	-3.12e-12	2.28e-12	4.99886e-11
	0.882	1.58e-12	-1.96e-12	5.00098e-11	-3.31e-12	1.73e-12	4.99914e-11
	0.882	1.53e-12	-1.88e-12	5.00094e-11	-2.65e-12	5.82e-13	4.99971e-11
	0.882	1.48e-12	-1.5e-12	5.00075e-11	-2.78e-12	-3.68e-13	5.00018e-11
	0.882	1.48e-12	-8.54e-13	5.00043e-11	-2.62e-12	-1.86e-12	5.00093e-11
	0.882	1.5e-12	-1.49e-14	5.00001e-11	-2.57e-12	-2.33e-12	5.00116e-11
	0.882	1.55e-12	2.52e-13	4.99987e-11	-1.94e-12	-1.72e-12	5.00086e-11
	0.882	1.48e-12	1.05e-12	4.99948e-11	-2.13e-12	-1.64e-13	5.00008e-11
	0.882	1.41e-12	1.36e-12	4.99932e-11	-2.67e-12	1.53e-12	4.99923e-11
	0.882	1.4e-12	1.59e-12	4.99921e-11	-2.35e-12	2.07e-12	4.99897e-11
	0.882	1.38e-12	1.55e-12	4.99922e-11	-2.19e-12	2.07e-12	4.99897e-11
	0.882	1.38e-12	1.28e-12	4.99936e-11	-2.86e-12	1.53e-12	4.99923e-11
	0.882	1.38e-12	1.17e-12	4.99942e-11	-3.18e-12	-1.64e-13	5.00008e-11
	0.882	1.46e-12	6.34e-13	4.99968e-11	-4.53e-12	-1.45e-12	5.00072e-11
	0.883	1.49e-12	-1.49e-14	5.00001e-11	-4.67e-12	-2.61e-12	5.00131e-11
	0.883	1.52e-12	-7.02e-13	5.00035e-11	-4.32e-12	-1.86e-12	5.00093e-11
	0.883	1.51e-12	-1.12e-12	5.00056e-11	-3.81e-12	-8.43e-13	5.00042e-11
	0.883	1.4e-12	-1.69e-12	5.00085e-11	-4.49e-12	7.17e-13	4.99964e-11
	0.883	1.38e-12	-1.62e-12	5.00081e-11	-4.37e-12	1.94e-12	4.99903e-11
	0.883	1.48e-12	-1.58e-12	5.00079e-11	-4.15e-12	2.14e-12	4.99893e-11
	0.883	1.42e-12	-1.27e-12	5.00064e-11	-4.63e-12	1.73e-12	4.99914e-11
	0.883	1.35e-12	-7.78e-13	5.00039e-11	-4.79e-12	6.49e-13	4.99968e-11
	0.883	1.4e-12	9.96e-14	4.99995e-11	-3.84e-12	-8.43e-13	5.00042e-11
	0.883	1.46e-12	5.57e-13	4.99972e-11	-4.06e-12	-1.86e-12	5.00093e-11
	0.883	1.41e-12	1.13e-12	4.99944e-11	-4.42e-12	-2.27e-12	5.00114e-11
	0.883	1.46e-12	1.47e-12	4.99927e-11	-3.95e-12	-1.52e-12	5.00076e-11
	0.883	1.46e-12	1.59e-12	4.99921e-11	-2.91e-12	1.07e-13	4.99995e-11
	0.883	1.41e-12	1.59e-12	4.99921e-11	-2.95e-12	1.53e-12	4.99923e-11
	0.883	1.38e-12	1.4e-12	4.9993e-11	-3.29e-12	2.55e-12	4.99873e-11
	0.883	1.44e-12	8.24e-13	4.99959e-11	-3.19e-12	1.8e-12	4.9991e-11
	0.883	1.44e-12	9.96e-14	4.99995e-11	-3.1e-12	1.12e-12	4.99944e-11
	0.883	1.41e-12	-5.11e-13	5.00026e-11	-2.99e-12	-3e-13	5.00015e-11
	0.883	1.44e-12	-1.04e-12	5.00052e-11	-2.42e-12	-1.59e-12	5.0008e-11
	0.883	1.42e-12	-1.69e-12	5.00085e-11	-2.04e-12	-2.13e-12	5.00107e-11
	0.884	1.43e-12	-1.81e-12	5.00091e-11	-2.08e-12	-1.79e-12	5.0009e-11
	0.884	1.45e-12	-1.73e-12	5.00086e-11	-2.21e-12	-5.71e-13	5.00029e-11
	0.884	1.57e-12	-1.24e-12	5.00062e-11	-2.43e-12	1.06e-12	4.99947e-11
	0.884	1.57e-12	-1.01e-12	5.00051e-11	-2.59e-12	1.94e-12	4.99903e-11
	0.884	1.44e-12	-2.44e-13	5.00012e-11	-2.77e-12	2.48e-12	4.99876e-11
	0.884	1.49e-12	4.05e-13	4.9998e-11	-3.65e-12	1.26e-12	4.99937e-11
	0.884	1.51e-12	9.39e-13	4.99953e-11	-4.7e-12	2.43e-13	4.99988e-11
	0.884	1.42e-12	1.36e-12	4.99932e-11	-5.14e-12	-1.25e-12	5.00063e-11
	0.884	1.39e-12	1.55e-12	4.99922e-11	-4.36e-12	-1.86e-12	5.00093e-11
	0.884	1.48e-12	1.51e-12	4.99924e-11	-4.84e-12	-2.33e-12	5.00116e-11
	0.884	1.42e-12	1.43e-12	4.99929e-11	-5.36e-12	-1.52e-12	5.00076e-11
	0.884	1.43e-12	1.02e-12	4.99949e-11	-4.67e-12	3.91e-14	4.99998e-11
	0.884	1.5e-12	6.72e-13	4.99966e-11	-4.13e-12	1.46e-12	4.99927e-11
	0.884	1.51e-12	6.14e-14	4.99997e-11	-3.77e-12	2.41e-12	4.99879e-11
	0.884	1.51e-12	-6.63e-13	5.00033e-11	-4.1e-12	1.67e-12	4.99917e-11
	0.884	1.55e-12	-1.12e-12	5.00056e-11	-3.5e-12	9.21e-13	4.99954e-11
	0.884	1.54e-12	-1.46e-12	5.00073e-11	-3.64e-12	-5.71e-13	5.00029e-11
	0.884	1.45e-12	-1.66e-12	5.00083e-11	-3.19e-12	-1.72e-12	5.00086e-11
	0.884	1.48e-12	-1.39e-12	5.0007e-11	-3.01e-12	-2.06e-12	5.00103e-11
	0.884	1.49e-12	-1.31e-12	5.00066e-11	-2.59e-12	-1.66e-12	5.00083e-11
	0.885	1.41e-12	-6.25e-13	5.00031e-11	-2.58e-12	-4.36e-13	5.00022e-11
	0.885	1.44e-12	-1.29e-13	5.00006e-11	-2.38e-12	1.12e-12	4.99944e-11
	0.885	1.58e-12	3.67e-13	4.99982e-11	-2.28e-12	2.01e-12	4.999e-11
	0.885	1.63e-12	9.01e-13	4.99955e-11	-2.97e-12	2.01e-12	4.999e-11
	0.885	1.56e-12	1.47e-12	4.99927e-11	-2.92e-12	1.26e-12	4.99937e-11
	0.885	1.5e-12	1.66e-12	4.99917e-11	-3.11e-12	1.07e-13	4.99995e-11
	0.885	1.5e-12	1.47e-12	4.99927e-11	-3.1e-12	-1.18e-12	5.00059e-11
	0.885	1.51e-12	1.21e-12	4.99939e-11	-3.23e-12	-2.06e-12	5.00103e-11
	0.885	1.64e-12	9.01e-13	4.99955e-11	-3.68e-12	-2e-12	5.001e-11
	0.885	1.67e-12	4.43e-13	4.99978e-11	-3.91e-12	-1.11e-12	5.00056e-11
	0.885	1.6e-12	-2.82e-13	5.00014e-11	-4.07e-12	5.14e-13	4.99974e-11
	0.885	1.57e-12	-5.49e-13	5.00027e-11	-3.84e-12	1.73e-12	4.99914e-11
	0.885	1.48e-12	-1.08e-12	5.00054e-11	-3.5e-12	2.07e-12	4.99897e-11
	0.885	1.45e-12	-1.35e-12	5.00068e-11	-4e-12	1.87e-12	4.99907e-11
	0.885	1.62e-12	-1.5e-12	5.00075e-11	-4.17e-12	7.85e-13	4.99961e-11
	0.885	1.75e-12	-1.39e-12	5.0007e-11	-4.4e-12	-5.03e-13	5.00025e-11
	0.885	1.67e-12	-8.92e-13	5.00045e-11	-4.13e-12	-1.86e-12	5.00093e-11
	0.885	1.58e-12	-3.2e-13	5.00016e-11	-3.84e-12	-2.47e-12	5.00124e-11
	0.885	1.61e-12	2.52e-13	4.99987e-11	-3.76e-12	-1.59e-12	5.0008e-11
	0.885	1.62e-12	6.34e-13	4.99968e-11	-4.17e-12	-1.64e-13	5.00008e-11
	0.886	1.67e-12	9.77e-13	4.99951e-11	-4.29e-12	1.12e-12	4.99944e-11
	0.886	1.67e-12	1.43e-12	4.99929e-11	-4.11e-12	2.21e-12	4.9989e-11
	0.886	1.67e-12	1.4e-12	4.9993e-11	-3.6e-12	2.14e-12	4.99893e-11
	0.886	1.59e-12	1.28e-12	4.99936e-11	-3.1e-12	1.33e-12	4.99934e-11
	0.886	1.63e-12	1.13e-12	4.99944e-11	-4.22e-12	1.07e-13	4.99995e-11
	0.886	1.72e-12	7.48e-13	4.99963e-11	-4.98e-12	-1.32e-12	5.00066e-11
	0.886	1.7e-12	3.28e-13	4.99984e-11	-4e-12	-2.2e-12	5.0011e-11
	0.886	1.71e-12	-2.06e-13	5.0001e-11	-3.91e-12	-1.93e-12	5.00097e-11
	0.886	1.68e-12	-8.16e-13	5.00041e-11	-3.16e-12	-1.25e-12	5.00063e-11
	0.886	1.58e-12	-1.08e-12	5.00054e-11	-3.12e-12	2.43e-13	4.99988e-11
	0.886	1.6e-12	-1.31e-12	5.00066e-11	-3.95e-12	1.53e-12	4.99923e-11
	0.886	1.67e-12	-1.39e-12	5.0007e-11	-4.72e-12	2.07e-12	4.99897e-11
	0.886	1.61e-12	-1.43e-12	5.00071e-11	-4.61e-12	1.94e-12	4.99903e-11
	0.886	1.6e-12	-7.4e-13	5.00037e-11	-4.41e-12	7.17e-13	4.99964e-11
	0.886	1.67e-12	-2.06e-13	5.0001e-11	-4.42e-12	-4.36e-13	5.00022e-11
	0.886	1.69e-12	2.52e-13	4.99987e-11	-4.23e-12	-1.86e-12	5.00093e-11
	0.886	1.68e-12	8.24e-13	4.99959e-11	-3.62e-12	-2.13e-12	5.00107e-11
	0.886	1.73e-12	1.02e-12	4.99949e-11	-2.93e-12	-1.79e-12	5.0009e-11
	0.886	1.65e-12	1.28e-12	4.99936e-11	-3.42e-12	-9.66e-14	5.00005e-11
	0.886	1.53e-12	1.21e-12	4.99939e-11	-3.39e-12	1.26e-12	4.99937e-11
	0.887	1.5e-12	9.01e-13	4.99955e-11	-2.8e-12	2.01e-12	4.999e-11
	0.887	1.69e-12	6.72e-13	4.99966e-11	-2.96e-12	1.73e-12	4.99914e-11
	0.887	1.64e-12	2.14e-13	4.99989e-11	-3.1e-12	1.12e-12	4.99944e-11
	0.887	1.66e-12	-2.82e-13	5.00014e-11	-3.23e-12	-2.87e-14	5.00001e-11
	0.887	1.65e-12	-7.02e-13	5.00035e-11	-3.01e-12	-1.05e-12	5.00053e-11
	0.887	1.61e-12	-1.01e-12	5.00051e-11	-3.61e-12	-2.2e-12	5.0011e-11
	0.887	1.57e-12	-1.2e-12	5.0006e-11	-4.21e-12	-2e-12	5.001e-11
	0.887	1.64e-12	-1.27e-12	5.00064e-11	-3.79e-12	-9.1e-13	5.00046e-11
	0.887	1.64e-12	-1.12e-12	5.00056e-11	-2.88e-12	6.49e-13	4.99968e-11
	0.887	1.54e-12	-7.02e-13	5.00035e-11	-3.49e-12	1.73e-12	4.99914e-11
	0.887	1.52e-12	-4.34e-13	5.00022e-11	-3.95e-12	1.87e-12	4.99907e-11
	0.887	1.58e-12	1.76e-13	4.99991e-11	-3.81e-12	1.33e-12	4.99934e-11
	0.887	1.58e-12	5.95e-13	4.9997e-11	-4.37e-12	6.49e-13	4.99968e-11
	0.887	1.54e-12	1.09e-12	4.99946e-11	-4.45e-12	-7.75e-13	5.00039e-11
	0.887	1.53e-12	1.32e-12	4.99934e-11	-3.77e-12	-2.13e-12	5.00107e-11
	0.887	1.64e-12	1.32e-12	4.99934e-11	-3.73e-12	-2.33e-12	5.00116e-11
	0.887	1.7e-12	1.02e-12	4.99949e-11	-4.32e-12	-1.18e-12	5.00059e-11
	0.887	1.74e-12	7.48e-13	4.99963e-11	-4.38e-12	-1.64e-13	5.00008e-11
	0.887	1.63e-12	5.95e-13	4.9997e-11	-4.23e-12	1.19e-12	4.9994e-11
	0.887	1.51e-12	1.38e-13	4.99993e-11	-4.7e-12	2.01e-12	4.999e-11
	0.888	1.49e-12	-2.82e-13	5.00014e-11	-3.85e-12	1.87e-12	4.99907e-11
	0.888	1.45e-12	-6.63e-13	5.00033e-11	-3.01e-12	1.26e-12	4.99937e-11
	0.888	1.5e-12	-1.12e-12	5.00056e-11	-3.12e-12	-3e-13	5.00015e-11
	0.888	1.62e-12	-1.43e-12	5.00071e-11	-3.24e-12	-1.39e-12	5.0007e-11
	0.888	1.7e-12	-1.24e-12	5.00062e-11	-3.19e-12	-2.2e-12	5.0011e-11
	0.888	1.61e-12	-1.24e-12	5.00062e-11	-2.69e-12	-2e-12	5.001e-11
	0.888	1.52e-12	-9.3e-13	5.00047e-11	-3.27e-12	-7.75e-13	5.00039e-11
	0.888	1.58e-12	-2.44e-13	5.00012e-11	-2.84e-12	5.14e-13	4.99974e-11
	0.888	1.61e-12	1.38e-13	4.99993e-11	-2.11e-12	1.67e-12	4.99917e-11
	0.888	1.67e-12	7.86e-13	4.99961e-11	-2.53e-12	1.94e-12	4.99903e-11
	0.888	1.61e-12	1.09e-12	4.99946e-11	-2.63e-12	1.6e-12	4.9992e-11
	0.888	1.54e-12	1.13e-12	4.99944e-11	-2.8e-12	4.46e-13	4.99978e-11
	0.888	1.65e-12	9.39e-13	4.99953e-11	-2.17e-12	-9.1e-13	5.00046e-11
	0.888	1.72e-12	9.39e-13	4.99953e-11	-1.43e-12	-2.2e-12	5.0011e-11
	0.888	1.7e-12	5.95e-13	4.9997e-11	-1.52e-12	-2.06e-12	5.00103e-11
	0.888	1.7e-12	1.76e-13	4.99991e-11	-1.66e-12	-1.39e-12	5.0007e-11
	0.888	1.54e-12	9.96e-14	4.99995e-11	-1.96e-12	1.75e-13	4.99991e-11
	0.888	1.61e-12	-2.44e-13	5.00012e-11	-1.25e-12	1.46e-12	4.99927e-11
	0.888	1.7e-12	-6.63e-13	5.00033e-11	-1.45e-12	1.94e-12	4.99903e-11
	0.888	1.7e-12	-9.3e-13	5.00047e-11	-1.9e-12	1.53e-12	4.99923e-11
	0.889	1.73e-12	-1.08e-12	5.00054e-11	-1.36e-12	8.53e-13	4.99957e-11
	0.889	1.74e-12	-1.16e-12	5.00058e-11	-8.84e-13	-3e-13	5.00015e-11
	0.889	1.62e-12	-1.01e-12	5.00051e-11	-9.25e-13	-1.72e-12	5.00086e-11
	0.889	1.69e-12	-5.87e-13	5.00029e-11	-1.21e-12	-2.06e-12	5.00103e-11
	0.889	1.7e-12	-5.3e-14	5.00003e-11	-4.23e-13	-1.86e-12	5.00093e-11
	0.889	1.71e-12	4.05e-13	4.9998e-11	-5.32e-13	-4.36e-13	5.00022e-11
	0.889	1.77e-12	6.72e-13	4.99966e-11	-7.76e-13	9.89e-13	4.99951e-11
	0.889	1.77e-12	9.01e-13	4.99955e-11	-5.45e-13	1.8e-12	4.9991e-11
	0.889	1.8e-12	1.05e-12	4.99948e-11	-4.64e-13	1.94e-12	4.99903e-11
	0.889	1.75e-12	1.13e-12	4.99944e-11	-6.67e-13	1.19e-12	4.9994e-11
	0.889	1.71e-12	8.63e-13	4.99957e-11	-3.96e-13	4.46e-13	4.99978e-11
	0.889	1.66e-12	5.95e-13	4.9997e-11	-3.55e-13	-1.05e-12	5.00053e-11
	0.889	1.75e-12	4.81e-13	4.99976e-11	-4.23e-13	-1.79e-12	5.0009e-11
	0.889	1.74e-12	-9.12e-14	5.00005e-11	-3.83e-13	-2.13e-12	5.00107e-11
	0.889	1.76e-12	-1.67e-13	5.00008e-11	-3.42e-13	-1.11e-12	5.00056e-11
	0.889	1.7e-12	-7.02e-13	5.00035e-11	4.31e-13	4.46e-13	4.99978e-11
	0.889	1.69e-12	-9.3e-13	5.00047e-11	-1.25e-13	1.4e-12	4.9993e-11
	0.889	1.83e-12	-1.24e-12	5.00062e-11	-3.83e-13	1.87e-12	4.99907e-11
	0.889	1.8e-12	-1.16e-12	5.00058e-11	-3.83e-13	1.8e-12	4.9991e-11
	0.889	1.72e-12	-8.16e-13	5.00041e-11	-2.88e-13	7.17e-13	4.99964e-11
	0.89	1.67e-12	-6.25e-13	5.00031e-11	2.55e-13	-3e-13	5.00015e-11
	0.89	1.8e-12	-2.44e-13	5.00012e-11	-3.15e-13	-1.59e-12	5.0008e-11
	0.89	1.76e-12	3.28e-13	4.99984e-11	-3e-14	-2.13e-12	5.00107e-11
	0.89	1.74e-12	6.34e-13	4.99968e-11	-3.55e-13	-1.39e-12	5.0007e-11
	0.89	1.66e-12	9.39e-13	4.99953e-11	-1.18e-12	-2.32e-13	5.00012e-11
	0.89	1.77e-12	7.1e-13	4.99965e-11	-5.45e-13	7.17e-13	4.99964e-11
	0.89	1.84e-12	4.43e-13	4.99978e-11	-3e-14	1.8e-12	4.9991e-11
	0.89	1.75e-12	3.67e-13	4.99982e-11	-7.07e-14	1.94e-12	4.99903e-11
	0.89	1.58e-12	2.14e-13	4.99989e-11	-3.83e-13	1.33e-12	4.99934e-11
	0.89	1.59e-12	9.96e-14	4.99995e-11	7.85e-14	2.43e-13	4.99988e-11
	0.89	1.6e-12	-5.3e-14	5.00003e-11	5.8e-13	-1.11e-12	5.00056e-11
	0.89	1.73e-12	-3.96e-13	5.0002e-11	1.19e-13	-1.93e-12	5.00097e-11
	0.89	1.8e-12	-5.49e-13	5.00027e-11	-1.35e-12	-2e-12	5.001e-11
	0.89	1.79e-12	-8.54e-13	5.00043e-11	-1.21e-12	-1.25e-12	5.00063e-11
	0.89	1.68e-12	-9.3e-13	5.00047e-11	-7.22e-13	3.78e-13	4.99981e-11
	0.89	1.62e-12	-7.78e-13	5.00039e-11	-7.49e-13	1.4e-12	4.9993e-11
	0.89	1.65e-12	-6.63e-13	5.00033e-11	-1.01e-12	1.87e-12	4.99907e-11
	0.89	1.63e-12	-2.82e-13	5.00014e-11	-1.12e-12	1.87e-12	4.99907e-11
	0.89	1.57e-12	2.14e-13	4.99989e-11	-2.88e-13	7.17e-13	4.99964e-11
	0.89	1.53e-12	5.95e-13	4.9997e-11	-5.45e-13	-8.43e-13	5.00042e-11
	0.891	1.6e-12	7.86e-13	4.99961e-11	-1.18e-12	-1.52e-12	5.00076e-11
	0.891	1.66e-12	6.34e-13	4.99968e-11	-1.22e-12	-2e-12	5.001e-11
	0.891	1.69e-12	4.81e-13	4.99976e-11	-1.03e-12	-1.32e-12	5.00066e-11
	0.891	1.58e-12	7.1e-13	4.99965e-11	-1.13e-12	-3e-13	5.00015e-11
	0.891	1.6e-12	6.72e-13	4.99966e-11	-1.18e-12	7.85e-13	4.99961e-11
	0.891	1.62e-12	9.96e-14	4.99995e-11	-1.18e-12	1.67e-12	4.99917e-11
	0.891	1.68e-12	-5.3e-14	5.00003e-11	-7.49e-13	1.87e-12	4.99907e-11
	0.891	1.57e-12	-2.44e-13	5.00012e-11	-7.62e-13	1.12e-12	4.99944e-11
	0.891	1.59e-12	-4.34e-13	5.00022e-11	-9.66e-13	-9.66e-14	5.00005e-11
	0.891	1.61e-12	-7.4e-13	5.00037e-11	-1.32e-12	-1.18e-12	5.00059e-11
	0.891	1.6e-12	-8.92e-13	5.00045e-11	-1.03e-12	-2.33e-12	5.00116e-11
	0.891	1.64e-12	-1.04e-12	5.00052e-11	-5.05e-13	-1.79e-12	5.0009e-11
	0.891	1.65e-12	-7.02e-13	5.00035e-11	-9.39e-13	-1.05e-12	5.00053e-11
	0.891	1.54e-12	-5.87e-13	5.00029e-11	-1.49e-12	7.17e-13	4.99964e-11
	0.891	1.58e-12	-1.67e-13	5.00008e-11	-7.35e-13	1.53e-12	4.99923e-11
	0.891	1.63e-12	2.52e-13	4.99987e-11	-9.52e-13	2.21e-12	4.9989e-11
	0.891	1.59e-12	4.81e-13	4.99976e-11	-1.03e-12	1.73e-12	4.99914e-11
	0.891	1.6e-12	5.95e-13	4.9997e-11	-6.27e-13	7.85e-13	4.99961e-11
	0.891	1.64e-12	7.1e-13	4.99965e-11	-3.69e-13	-5.71e-13	5.00029e-11
	0.891	1.62e-12	7.1e-13	4.99965e-11	-3.69e-13	-1.66e-12	5.00083e-11
	0.892	1.6e-12	6.34e-13	4.99968e-11	-5.05e-13	-2.13e-12	5.00107e-11
	0.892	1.64e-12	4.81e-13	4.99976e-11	-1.79e-13	-1.25e-12	5.00063e-11
	0.892	1.69e-12	2.14e-13	4.99989e-11	-5.86e-13	-1.64e-13	5.00008e-11
	0.892	1.58e-12	6.14e-14	4.99997e-11	-4.5e-13	8.53e-13	4.99957e-11
	0.892	1.58e-12	-1.29e-13	5.00006e-11	-9.93e-13	1.94e-12	4.99903e-11
	0.892	1.53e-12	-3.2e-13	5.00016e-11	-7.62e-13	2.01e-12	4.999e-11
	0.892	1.6e-12	-5.87e-13	5.00029e-11	-5.45e-13	1.12e-12	4.99944e-11
	0.892	1.7e-12	-8.16e-13	5.00041e-11	-6.27e-13	-2.32e-13	5.00012e-11
	0.892	1.76e-12	-1.08e-12	5.00054e-11	1.33e-13	-1.18e-12	5.00059e-11
	0.892	1.62e-12	-9.69e-13	5.00048e-11	-3.28e-13	-2.13e-12	5.00107e-11
	0.892	1.51e-12	-4.73e-13	5.00024e-11	1.06e-13	-1.86e-12	5.00093e-11
	0.892	1.61e-12	-9.12e-14	5.00005e-11	4.72e-13	-7.07e-13	5.00035e-11
	0.892	1.69e-12	3.28e-13	4.99984e-11	3.79e-14	5.14e-13	4.99974e-11
	0.892	1.67e-12	4.43e-13	4.99978e-11	7.02e-13	1.53e-12	4.99923e-11
	0.892	1.67e-12	6.72e-13	4.99966e-11	9.21e-14	1.8e-12	4.9991e-11
	0.892	1.65e-12	7.86e-13	4.99961e-11	-3.28e-13	1.67e-12	4.99917e-11
	0.892	1.61e-12	7.48e-13	4.99963e-11	-3.01e-13	7.17e-13	4.99964e-11
	0.892	1.63e-12	7.48e-13	4.99963e-11	1.07e-14	-9.1e-13	5.00046e-11
	0.892	1.71e-12	6.72e-13	4.99966e-11	1.73e-13	-2e-12	5.001e-11
	0.892	1.74e-12	3.28e-13	4.99984e-11	5.26e-13	-2.06e-12	5.00103e-11
	0.893	1.75e-12	6.14e-14	4.99997e-11	-8.42e-14	-1.45e-12	5.00072e-11
	0.893	1.74e-12	-1.29e-13	5.00006e-11	-1.02e-12	3.91e-14	4.99998e-11
	0.893	1.51e-12	-5.11e-13	5.00026e-11	-6.27e-13	1.33e-12	4.99934e-11
	0.893	1.56e-12	-8.54e-13	5.00043e-11	-4.37e-13	1.67e-12	4.99917e-11
	0.893	1.67e-12	-8.54e-13	5.00043e-11	-9.66e-13	1.73e-12	4.99914e-11
	0.893	1.8e-12	-1.12e-12	5.00056e-11	-1.37e-12	1.06e-12	4.99947e-11
	0.893	1.76e-12	-7.78e-13	5.00039e-11	-1.35e-12	1.75e-13	4.99991e-11
	0.893	1.76e-12	-2.82e-13	5.00014e-11	-5.18e-13	-1.39e-12	5.0007e-11
	0.893	1.67e-12	-2.06e-13	5.0001e-11	-4.91e-13	-2.2e-12	5.0011e-11
	0.893	1.68e-12	2.33e-14	4.99999e-11	-1.11e-13	-1.52e-12	5.00076e-11
	0.893	1.68e-12	3.67e-13	4.99982e-11	2.82e-13	-5.71e-13	5.00029e-11
	0.893	1.77e-12	4.81e-13	4.99976e-11	-4.64e-13	7.85e-13	4.99961e-11
	0.893	1.77e-12	2.52e-13	4.99987e-11	3.79e-14	1.67e-12	4.99917e-11
	0.893	1.61e-12	6.34e-13	4.99968e-11	5.8e-13	1.73e-12	4.99914e-11
	0.893	1.58e-12	5.19e-13	4.99974e-11	8.79e-13	1.53e-12	4.99923e-11
	0.893	1.67e-12	4.81e-13	4.99976e-11	9.6e-13	7.17e-13	4.99964e-11
	0.893	1.64e-12	4.81e-13	4.99976e-11	-2.2e-13	-7.75e-13	5.00039e-11
	0.893	1.67e-12	2.52e-13	4.99987e-11	-3.96e-13	-2e-12	5.001e-11
	0.893	1.6e-12	9.96e-14	4.99995e-11	1.07e-14	-2.06e-12	5.00103e-11
	0.893	1.73e-12	-2.06e-13	5.0001e-11	-1.79e-13	-1.52e-12	5.00076e-11
	0.894	1.82e-12	-4.73e-13	5.00024e-11	-3.83e-13	4.46e-13	4.99978e-11
	0.894	1.8e-12	-7.4e-13	5.00037e-11	-2.06e-13	1.19e-12	4.9994e-11
	0.894	1.64e-12	-1.01e-12	5.00051e-11	2.01e-13	1.46e-12	4.99927e-11
	0.894	1.5e-12	-3.58e-13	5.00018e-11	3.5e-13	1.67e-12	4.99917e-11
	0.894	1.56e-12	-1.29e-13	5.00006e-11	9.21e-14	9.21e-13	4.99954e-11
	0.894	1.67e-12	9.96e-14	4.99995e-11	1.06e-13	1.75e-13	4.99991e-11
	0.894	1.77e-12	1.38e-13	4.99993e-11	7.84e-13	-1.25e-12	5.00063e-11
	0.894	1.74e-12	3.67e-13	4.99982e-11	5.94e-13	-2e-12	5.001e-11
	0.894	1.67e-12	3.28e-13	4.99984e-11	4.45e-13	-1.52e-12	5.00076e-11
	0.894	1.54e-12	4.43e-13	4.99978e-11	2.41e-13	-6.39e-13	5.00032e-11
	0.894	1.58e-12	4.81e-13	4.99976e-11	3.79e-14	6.49e-13	4.99968e-11
	0.894	1.61e-12	3.28e-13	4.99984e-11	3.63e-13	1.46e-12	4.99927e-11
	0.894	1.65e-12	4.05e-13	4.9998e-11	2.14e-13	1.53e-12	4.99923e-11
	0.894	1.65e-12	2.52e-13	4.99987e-11	3.09e-13	1.33e-12	4.99934e-11
	0.894	1.64e-12	-1.49e-14	5.00001e-11	7.43e-13	2.43e-13	4.99988e-11
	0.894	1.58e-12	-1.49e-14	5.00001e-11	2.68e-13	-8.43e-13	5.00042e-11
	0.894	1.55e-12	-4.34e-13	5.00022e-11	4.72e-13	-1.79e-12	5.0009e-11
	0.894	1.54e-12	-6.63e-13	5.00033e-11	8.25e-13	-1.86e-12	5.00093e-11
	0.894	1.57e-12	-7.02e-13	5.00035e-11	6.21e-13	-9.1e-13	5.00046e-11
	0.894	1.65e-12	-5.11e-13	5.00026e-11	5.26e-13	1.07e-13	4.99995e-11
	0.895	1.72e-12	-3.2e-13	5.00016e-11	8.92e-13	9.21e-13	4.99954e-11
	0.895	1.54e-12	-2.82e-13	5.00014e-11	9.33e-13	1.8e-12	4.9991e-11
	0.895	1.53e-12	-5.3e-14	5.00003e-11	1.2e-12	1.67e-12	4.99917e-11
	0.895	1.6e-12	2.9e-13	4.99986e-11	1.37e-12	9.21e-13	4.99954e-11
	0.895	1.52e-12	4.05e-13	4.9998e-11	1.27e-12	-2.32e-13	5.00012e-11
	0.895	1.59e-12	4.81e-13	4.99976e-11	1.41e-12	-1.66e-12	5.00083e-11
	0.895	1.64e-12	2.52e-13	4.99987e-11	1.3e-12	-2.2e-12	5.0011e-11
	0.895	1.61e-12	4.81e-13	4.99976e-11	1.38e-12	-1.59e-12	5.0008e-11
	0.895	1.54e-12	7.1e-13	4.99965e-11	1.31e-12	-6.39e-13	5.00032e-11
	0.895	1.61e-12	4.43e-13	4.99978e-11	1.16e-12	6.49e-13	4.99968e-11
	0.895	1.62e-12	4.43e-13	4.99978e-11	1.6e-12	1.73e-12	4.99914e-11
	0.895	1.6e-12	-5.3e-14	5.00003e-11	1.75e-12	1.46e-12	4.99927e-11
	0.895	1.62e-12	-5.11e-13	5.00026e-11	1.58e-12	1.53e-12	4.99923e-11
	0.895	1.65e-12	-5.87e-13	5.00029e-11	1.73e-12	5.14e-13	4.99974e-11
	0.895	1.54e-12	-8.16e-13	5.00041e-11	1.75e-12	-9.1e-13	5.00046e-11
	0.895	1.53e-12	-7.4e-13	5.00037e-11	1.62e-12	-2.27e-12	5.00114e-11
	0.895	1.54e-12	-4.73e-13	5.00024e-11	1.41e-12	-1.79e-12	5.0009e-11
	0.895	1.67e-12	-2.82e-13	5.00014e-11	1.83e-12	-1.05e-12	5.00053e-11
	0.895	1.67e-12	-9.12e-14	5.00005e-11	2.15e-12	5.14e-13	4.99974e-11
	0.895	1.61e-12	6.14e-14	4.99997e-11	2.22e-12	1.06e-12	4.99947e-11
	0.896	1.57e-12	4.05e-13	4.9998e-11	1.86e-12	1.73e-12	4.99914e-11
	0.896	1.64e-12	5.57e-13	4.99972e-11	1.73e-12	1.67e-12	4.99917e-11
	0.896	1.7e-12	5.19e-13	4.99974e-11	1.69e-12	9.21e-13	4.99954e-11
	0.896	1.74e-12	4.81e-13	4.99976e-11	1.99e-12	-2.32e-13	5.00012e-11
	0.896	1.66e-12	4.81e-13	4.99976e-11	1.87e-12	-1.79e-12	5.0009e-11
	0.896	1.61e-12	5.95e-13	4.9997e-11	1.56e-12	-1.93e-12	5.00097e-11
	0.896	1.67e-12	5.95e-13	4.9997e-11	2.14e-12	-1.32e-12	5.00066e-11
	0.896	1.71e-12	6.14e-14	4.99997e-11	2.55e-12	-2.32e-13	5.00012e-11
	0.896	1.82e-12	-1.29e-13	5.00006e-11	2.66e-12	1.06e-12	4.99947e-11
	0.896	1.87e-12	-5.49e-13	5.00027e-11	1.81e-12	1.26e-12	4.99937e-11
	0.896	1.75e-12	-6.63e-13	5.00033e-11	1.43e-12	1.53e-12	4.99923e-11
	0.896	1.64e-12	-8.54e-13	5.00043e-11	1.94e-12	1.33e-12	4.99934e-11
	0.896	1.67e-12	-9.3e-13	5.00047e-11	2.71e-12	1.75e-13	4.99991e-11
	0.896	1.85e-12	-7.4e-13	5.00037e-11	3.24e-12	-9.78e-13	5.00049e-11
	0.896	1.87e-12	-5.11e-13	5.00026e-11	2.45e-12	-2.06e-12	5.00103e-11
	0.896	1.87e-12	-2.82e-13	5.00014e-11	1.92e-12	-1.86e-12	5.00093e-11
	0.896	1.83e-12	-2.06e-13	5.0001e-11	2.03e-12	-7.07e-13	5.00035e-11
	0.896	1.73e-12	2.33e-14	4.99999e-11	2.36e-12	5.14e-13	4.99974e-11
	0.896	1.7e-12	2.52e-13	4.99987e-11	1.71e-12	1.12e-12	4.99944e-11
	0.896	1.84e-12	4.43e-13	4.99978e-11	2.29e-12	1.67e-12	4.99917e-11
	0.897	1.95e-12	5.95e-13	4.9997e-11	2.45e-12	1.46e-12	4.99927e-11
	0.897	1.86e-12	5.19e-13	4.99974e-11	2.59e-12	9.21e-13	4.99954e-11
	0.897	1.8e-12	5.57e-13	4.99972e-11	2.71e-12	-6.39e-13	5.00032e-11
	0.897	1.83e-12	4.05e-13	4.9998e-11	2.51e-12	-1.72e-12	5.00086e-11
	0.897	1.83e-12	2.52e-13	4.99987e-11	3.35e-12	-2.2e-12	5.0011e-11
	0.897	1.84e-12	6.14e-14	4.99997e-11	3.32e-12	-1.32e-12	5.00066e-11
	0.897	1.8e-12	-3.58e-13	5.00018e-11	2.99e-12	-3e-13	5.00015e-11
	0.897	1.83e-12	-5.49e-13	5.00027e-11	1.95e-12	9.89e-13	4.99951e-11
	0.897	1.77e-12	-5.87e-13	5.00029e-11	2.22e-12	1.46e-12	4.99927e-11
	0.897	1.84e-12	-6.63e-13	5.00033e-11	3.14e-12	1.53e-12	4.99923e-11
	0.897	1.9e-12	-4.34e-13	5.00022e-11	3.06e-12	9.89e-13	4.99951e-11
	0.897	1.88e-12	-4.34e-13	5.00022e-11	3.25e-12	3.78e-13	4.99981e-11
	0.897	1.91e-12	-2.06e-13	5.0001e-11	3.29e-12	-1.25e-12	5.00063e-11
	0.897	1.87e-12	-1.49e-14	5.00001e-11	3.13e-12	-2e-12	5.001e-11
	0.897	1.91e-12	2.33e-14	4.99999e-11	3.08e-12	-1.59e-12	5.0008e-11
	0.897	1.79e-12	6.14e-14	4.99997e-11	2.86e-12	-5.71e-13	5.00029e-11
	0.897	1.81e-12	2.52e-13	4.99987e-11	3.06e-12	5.82e-13	4.99971e-11
	0.897	1.85e-12	5.19e-13	4.99974e-11	3.08e-12	9.21e-13	4.99954e-11
	0.897	1.87e-12	5.57e-13	4.99972e-11	2.89e-12	1.26e-12	4.99937e-11
	0.897	1.78e-12	4.81e-13	4.99976e-11	2.61e-12	1.4e-12	4.9993e-11
	0.898	1.76e-12	3.28e-13	4.99984e-11	2.68e-12	7.17e-13	4.99964e-11
	0.898	1.84e-12	2.52e-13	4.99987e-11	3.02e-12	-4.36e-13	5.00022e-11
	0.898	1.86e-12	-2.06e-13	5.0001e-11	3.18e-12	-1.72e-12	5.00086e-11
	0.898	1.93e-12	-3.58e-13	5.00018e-11	3.16e-12	-1.66e-12	5.00083e-11
	0.898	1.95e-12	-7.02e-13	5.00035e-11	2.66e-12	-1.11e-12	5.00056e-11
	0.898	1.93e-12	-7.02e-13	5.00035e-11	3.55e-12	-9.66e-14	5.00005e-11
	0.898	1.8e-12	-7.4e-13	5.00037e-11	3.39e-12	5.82e-13	4.99971e-11
	0.898	1.77e-12	-5.11e-13	5.00026e-11	3.36e-12	1.33e-12	4.99934e-11
	0.898	1.81e-12	-2.82e-13	5.00014e-11	3.02e-12	1.73e-12	4.99914e-11
	0.898	1.77e-12	-1.49e-14	5.00001e-11	2.94e-12	1.33e-12	4.99934e-11
	0.898	1.85e-12	9.96e-14	4.99995e-11	3.04e-12	1.07e-13	4.99995e-11
	0.898	1.89e-12	1.38e-13	4.99993e-11	2.87e-12	-1.25e-12	5.00063e-11
	0.898	1.92e-12	3.28e-13	4.99984e-11	2.8e-12	-1.86e-12	5.00093e-11
	0.898	1.86e-12	4.81e-13	4.99976e-11	3.18e-12	-1.39e-12	5.0007e-11
	0.898	1.77e-12	4.43e-13	4.99978e-11	3.56e-12	-5.03e-13	5.00025e-11
	0.898	1.82e-12	6.34e-13	4.99968e-11	2.76e-12	4.46e-13	4.99978e-11
	0.898	1.89e-12	6.72e-13	4.99966e-11	2.02e-12	1.12e-12	4.99944e-11
	0.898	1.9e-12	4.43e-13	4.99978e-11	2.55e-12	1.46e-12	4.99927e-11
	0.898	1.99e-12	9.96e-14	4.99995e-11	3.33e-12	1.53e-12	4.99923e-11
	0.898	1.85e-12	-2.06e-13	5.0001e-11	3.23e-12	9.21e-13	4.99954e-11
	0.899	1.77e-12	-4.34e-13	5.00022e-11	3.58e-12	-7.75e-13	5.00039e-11
	0.899	1.74e-12	-5.11e-13	5.00026e-11	3.56e-12	-1.59e-12	5.0008e-11
	0.899	1.85e-12	-5.87e-13	5.00029e-11	3.24e-12	-1.59e-12	5.0008e-11
	0.899	1.93e-12	-4.34e-13	5.00022e-11	3.84e-12	-9.78e-13	5.00049e-11
	0.899	1.83e-12	-2.44e-13	5.00012e-11	4.12e-12	1.07e-13	4.99995e-11
	0.899	1.8e-12	-2.82e-13	5.00014e-11	4.42e-12	8.53e-13	4.99957e-11
	0.899	1.92e-12	-5.3e-14	5.00003e-11	4.45e-12	1.4e-12	4.9993e-11
	0.899	2.01e-12	-9.12e-14	5.00005e-11	3.62e-12	1.67e-12	4.99917e-11
	0.899	2.03e-12	1.38e-13	4.99993e-11	3.63e-12	1.46e-12	4.99927e-11
	0.899	1.87e-12	2.14e-13	4.99989e-11	4.13e-12	3.1e-13	4.99984e-11
	0.899	1.74e-12	5.57e-13	4.99972e-11	4.24e-12	-1.32e-12	5.00066e-11
	0.899	1.87e-12	7.86e-13	4.99961e-11	4.16e-12	-1.79e-12	5.0009e-11
	0.899	1.93e-12	5.57e-13	4.99972e-11	3.66e-12	-1.39e-12	5.0007e-11
	0.899	1.95e-12	6.34e-13	4.99968e-11	4.31e-12	-3.68e-13	5.00018e-11
	0.899	1.95e-12	4.05e-13	4.9998e-11	4.55e-12	4.46e-13	4.99978e-11
	0.899	1.9e-12	2.33e-14	4.99999e-11	4.45e-12	1.19e-12	4.9994e-11
	0.899	1.93e-12	-3.96e-13	5.0002e-11	4.53e-12	1.4e-12	4.9993e-11
	0.899	2.06e-12	-5.11e-13	5.00026e-11	3.92e-12	1.12e-12	4.99944e-11
	0.899	2.04e-12	-8.92e-13	5.00045e-11	3.54e-12	5.14e-13	4.99974e-11
	0.899	1.93e-12	-8.16e-13	5.00041e-11	3.48e-12	-5.71e-13	5.00029e-11
	0.9	1.8e-12	-4.73e-13	5.00024e-11	4.36e-12	-1.79e-12	5.0009e-11
	0.9	1.81e-12	-3.96e-13	5.0002e-11	4.05e-12	-1.86e-12	5.00093e-11
	0.9	1.88e-12	-9.12e-14	5.00005e-11	4.13e-12	-7.07e-13	5.00035e-11
	0.9	2.05e-12	-1.49e-14	5.00001e-11	4.39e-12	1.07e-13	4.99995e-11
	0.9	2.09e-12	2.14e-13	4.99989e-11	3.75e-12	7.17e-13	4.99964e-11
	0.9	1.93e-12	6.14e-14	4.99997e-11	3.54e-12	1.26e-12	4.99937e-11
	0.9	1.86e-12	6.72e-13	4.99966e-11	4.08e-12	1.73e-12	4.99914e-11
	0.9	1.96e-12	6.72e-13	4.99966e-11	4.09e-12	1.06e-12	4.99947e-11
	0.9	2.04e-12	7.86e-13	4.99961e-11	3.62e-12	1.07e-13	4.99995e-11
	0.9	2.01e-12	7.48e-13	4.99963e-11	3.71e-12	-1.45e-12	5.00072e-11
	0.9	1.99e-12	6.34e-13	4.99968e-11	3.4e-12	-2.06e-12	5.00103e-11
	0.9	1.96e-12	4.81e-13	4.99976e-11	3.37e-12	-1.18e-12	5.00059e-11
	0.9	1.93e-12	-2.06e-13	5.0001e-11	3.81e-12	-4.36e-13	5.00022e-11
	0.9	1.91e-12	-1.29e-13	5.00006e-11	4.03e-12	7.17e-13	4.99964e-11
	0.9	2.03e-12	-6.25e-13	5.00031e-11	3.97e-12	1.12e-12	4.99944e-11
	0.9	2.02e-12	-6.25e-13	5.00031e-11	3.73e-12	1.53e-12	4.99923e-11
	0.9	1.9e-12	-7.02e-13	5.00035e-11	3.1e-12	1.33e-12	4.99934e-11
	0.9	1.87e-12	-7.4e-13	5.00037e-11	2.51e-12	5.14e-13	4.99974e-11
	0.9	2e-12	-4.73e-13	5.00024e-11	2.47e-12	-1.05e-12	5.00053e-11
	0.9	2.02e-12	-5.11e-13	5.00026e-11	2.24e-12	-1.59e-12	5.0008e-11
	0.901	2.09e-12	-2.44e-13	5.00012e-11	2.07e-12	-1.79e-12	5.0009e-11
	0.901	2.05e-12	-1.49e-14	5.00001e-11	1.68e-12	-7.75e-13	5.00039e-11
	0.901	2.03e-12	1.38e-13	4.99993e-11	2.14e-12	1.07e-13	4.99995e-11
	0.901	2.01e-12	4.05e-13	4.9998e-11	2.25e-12	7.17e-13	4.99964e-11
	0.901	1.91e-12	7.1e-13	4.99965e-11	3.04e-12	1.26e-12	4.99937e-11
	0.901	1.91e-12	6.72e-13	4.99966e-11	2.98e-12	1.53e-12	4.99923e-11
	0.901	1.98e-12	8.63e-13	4.99957e-11	2.41e-12	1.12e-12	4.99944e-11
	0.901	1.97e-12	7.86e-13	4.99961e-11	2.24e-12	-2.32e-13	5.00012e-11
	0.901	1.99e-12	4.43e-13	4.99978e-11	2.75e-12	-1.32e-12	5.00066e-11
	0.901	1.99e-12	9.96e-14	4.99995e-11	3.28e-12	-1.72e-12	5.00086e-11
	0.901	2.06e-12	-3.96e-13	5.0002e-11	3.1e-12	-1.32e-12	5.00066e-11
	0.901	2.03e-12	-3.58e-13	5.00018e-11	2.95e-12	-3e-13	5.00015e-11
	0.901	1.98e-12	-8.54e-13	5.00043e-11	3.06e-12	4.46e-13	4.99978e-11
	0.901	2.06e-12	-6.63e-13	5.00033e-11	3.16e-12	9.21e-13	4.99954e-11
	0.901	2.03e-12	-4.73e-13	5.00024e-11	3.54e-12	1.67e-12	4.99917e-11
	0.901	1.94e-12	-7.02e-13	5.00035e-11	3.1e-12	1.4e-12	4.9993e-11
	0.901	1.9e-12	-2.06e-13	5.0001e-11	2.85e-12	3.1e-13	4.99984e-11
	0.901	1.98e-12	-5.3e-14	5.00003e-11	2.71e-12	-1.05e-12	5.00053e-11
	0.901	2.02e-12	9.96e-14	4.99995e-11	2.83e-12	-1.45e-12	5.00072e-11
	0.901	1.93e-12	3.67e-13	4.99982e-11	3.2e-12	-1.32e-12	5.00066e-11
	0.902	2.06e-12	4.81e-13	4.99976e-11	2.91e-12	-7.07e-13	5.00035e-11
	0.902	2.13e-12	5.95e-13	4.9997e-11	3.17e-12	1.07e-13	4.99995e-11
	0.902	1.99e-12	7.48e-13	4.99963e-11	3.31e-12	5.82e-13	4.99971e-11
	0.902	1.93e-12	6.72e-13	4.99966e-11	2.8e-12	1.26e-12	4.99937e-11
	0.902	2.05e-12	5.95e-13	4.9997e-11	3.5e-12	1.4e-12	4.9993e-11
	0.902	2.12e-12	9.96e-14	4.99995e-11	3.52e-12	7.85e-13	4.99961e-11
	0.902	2.1e-12	-9.12e-14	5.00005e-11	3.63e-12	-2.32e-13	5.00012e-11
	0.902	2.03e-12	-2.82e-13	5.00014e-11	4.04e-12	-1.59e-12	5.0008e-11
	0.902	1.97e-12	-6.25e-13	5.00031e-11	4.17e-12	-1.66e-12	5.00083e-11
	0.902	1.91e-12	-5.87e-13	5.00029e-11	3.81e-12	-1.11e-12	5.00056e-11
	0.902	2.07e-12	-6.63e-13	5.00033e-11	4.58e-12	-9.66e-14	5.00005e-11
	0.902	2.11e-12	-5.49e-13	5.00027e-11	5e-12	5.82e-13	4.99971e-11
	0.902	2.04e-12	-4.34e-13	5.00022e-11	5e-12	1.33e-12	4.99934e-11
	0.902	2.05e-12	-2.44e-13	5.00012e-11	4.99e-12	1.67e-12	4.99917e-11
	0.902	2.1e-12	-2.44e-13	5.00012e-11	5.46e-12	1.26e-12	4.99937e-11
	0.902	2.05e-12	2.33e-14	4.99999e-11	4.99e-12	4.46e-13	4.99978e-11
	0.902	1.97e-12	1.76e-13	4.99991e-11	4.85e-12	-7.07e-13	5.00035e-11
	0.902	1.99e-12	6.72e-13	4.99966e-11	4.89e-12	-1.72e-12	5.00086e-11
	0.902	2.11e-12	6.72e-13	4.99966e-11	4.73e-12	-1.25e-12	5.00063e-11
	0.902	2.09e-12	6.72e-13	4.99966e-11	5.41e-12	-6.39e-13	5.00032e-11
	0.903	2e-12	5.95e-13	4.9997e-11	5.48e-12	-1.64e-13	5.00008e-11
	0.903	1.98e-12	3.28e-13	4.99984e-11	5.54e-12	7.17e-13	4.99964e-11
	0.903	2.07e-12	-9.12e-14	5.00005e-11	5.42e-12	1.33e-12	4.99934e-11
	0.903	2.1e-12	-3.58e-13	5.00018e-11	5.45e-12	1.73e-12	4.99914e-11
	0.903	2.16e-12	-7.4e-13	5.00037e-11	5.84e-12	7.85e-13	4.99961e-11
	0.903	2.15e-12	-7.02e-13	5.00035e-11	5.97e-12	-2.32e-13	5.00012e-11
	0.903	2.08e-12	-7.4e-13	5.00037e-11	5.64e-12	-1.11e-12	5.00056e-11
	0.903	1.92e-12	-5.87e-13	5.00029e-11	6.13e-12	-1.18e-12	5.00059e-11
	0.903	1.96e-12	-4.73e-13	5.00024e-11	6.34e-12	-1.11e-12	5.00056e-11
	0.903	2.07e-12	-3.2e-13	5.00016e-11	6.14e-12	-3e-13	5.00015e-11
	0.903	2.01e-12	-1.67e-13	5.00008e-11	6.05e-12	5.14e-13	4.99974e-11
	0.903	2.01e-12	-1.49e-14	5.00001e-11	5.97e-12	1.06e-12	4.99947e-11
	0.903	2.09e-12	4.43e-13	4.99978e-11	5.5e-12	1.4e-12	4.9993e-11
	0.903	2.06e-12	5.57e-13	4.99972e-11	5.52e-12	1.33e-12	4.99934e-11
	0.903	2.12e-12	8.24e-13	4.99959e-11	5.56e-12	2.43e-13	4.99988e-11
	0.903	2.15e-12	7.1e-13	4.99965e-11	5.48e-12	-8.43e-13	5.00042e-11
	0.903	2.04e-12	9.39e-13	4.99953e-11	5.54e-12	-1.39e-12	5.0007e-11
	0.903	1.91e-12	6.72e-13	4.99966e-11	5.67e-12	-1.25e-12	5.00063e-11
	0.903	1.92e-12	2.9e-13	4.99986e-11	6.18e-12	-7.75e-13	5.00039e-11
	0.903	1.99e-12	6.14e-14	4.99997e-11	6.15e-12	3.91e-14	4.99998e-11
	0.904	1.95e-12	-3.58e-13	5.00018e-11	5.19e-12	7.17e-13	4.99964e-11
	0.904	1.98e-12	-5.87e-13	5.00029e-11	5.33e-12	1.4e-12	4.9993e-11
	0.904	2.14e-12	-9.3e-13	5.00047e-11	5.16e-12	1.6e-12	4.9992e-11
	0.904	2.08e-12	-1.24e-12	5.00062e-11	4.27e-12	9.21e-13	4.99954e-11
	0.904	1.97e-12	-1.01e-12	5.00051e-11	3.61e-12	-2.32e-13	5.00012e-11
	0.904	1.97e-12	-8.16e-13	5.00041e-11	4.03e-12	-1.39e-12	5.0007e-11
	0.904	2.03e-12	-4.73e-13	5.00024e-11	4.09e-12	-1.72e-12	5.00086e-11
	0.904	2.07e-12	-3.58e-13	5.00018e-11	4.12e-12	-1.11e-12	5.00056e-11
	0.904	2.12e-12	-1.49e-14	5.00001e-11	3.94e-12	-6.39e-13	5.00032e-11
	0.904	2.04e-12	2.33e-14	4.99999e-11	4.05e-12	4.46e-13	4.99978e-11
	0.904	1.97e-12	5.57e-13	4.99972e-11	3.56e-12	1.06e-12	4.99947e-11
	0.904	1.96e-12	8.63e-13	4.99957e-11	3.69e-12	1.8e-12	4.9991e-11
	0.904	1.93e-12	9.77e-13	4.99951e-11	4.69e-12	1.19e-12	4.9994e-11
	0.904	2.03e-12	8.63e-13	4.99957e-11	4.65e-12	3.78e-13	4.99981e-11
	0.904	2.1e-12	7.1e-13	4.99965e-11	4.46e-12	-1.05e-12	5.00053e-11
	0.904	2.12e-12	3.67e-13	4.99982e-11	4.15e-12	-1.45e-12	5.00072e-11
	0.904	2.06e-12	1.38e-13	4.99993e-11	4.5e-12	-1.25e-12	5.00063e-11
	0.904	2.03e-12	-2.82e-13	5.00014e-11	4.41e-12	-8.43e-13	5.00042e-11
	0.904	2.06e-12	-5.11e-13	5.00026e-11	4.31e-12	-1.64e-13	5.00008e-11
	0.904	2.08e-12	-7.02e-13	5.00035e-11	4.22e-12	7.85e-13	4.99961e-11
	0.905	2.1e-12	-7.02e-13	5.00035e-11	4.27e-12	1.46e-12	4.99927e-11
	0.905	2.03e-12	-8.92e-13	5.00045e-11	4.22e-12	1.67e-12	4.99917e-11
	0.905	2.07e-12	-7.78e-13	5.00039e-11	4.47e-12	7.17e-13	4.99964e-11
	0.905	2.09e-12	-7.02e-13	5.00035e-11	4.47e-12	-5.71e-13	5.00029e-11
	0.905	2.07e-12	-3.2e-13	5.00016e-11	4.39e-12	-1.18e-12	5.00059e-11
	0.905	2.17e-12	-9.12e-14	5.00005e-11	4.11e-12	-1.18e-12	5.00059e-11
	0.905	2.19e-12	2.9e-13	4.99986e-11	3.59e-12	-1.25e-12	5.00063e-11
	0.905	2.14e-12	5.19e-13	4.99974e-11	3.37e-12	-1.64e-13	5.00008e-11
	0.905	2.06e-12	9.01e-13	4.99955e-11	3.77e-12	3.1e-13	4.99984e-11
	0.905	2.03e-12	1.21e-12	4.99939e-11	4.2e-12	1.12e-12	4.99944e-11
	0.905	2.08e-12	1.05e-12	4.99948e-11	3.97e-12	1.6e-12	4.9992e-11
	0.905	2.2e-12	8.63e-13	4.99957e-11	3.48e-12	1.12e-12	4.99944e-11
	0.905	2.26e-12	3.28e-13	4.99984e-11	3.17e-12	3.91e-14	4.99998e-11
	0.905	2.13e-12	2.33e-14	4.99999e-11	3.17e-12	-1.05e-12	5.00053e-11
	0.905	2.15e-12	-2.82e-13	5.00014e-11	3.42e-12	-1.52e-12	5.00076e-11
	0.905	2.24e-12	-5.87e-13	5.00029e-11	3.78e-12	-1.05e-12	5.00053e-11
	0.905	2.22e-12	-8.16e-13	5.00041e-11	3.29e-12	-7.07e-13	5.00035e-11
	0.905	2.17e-12	-7.78e-13	5.00039e-11	3.04e-12	2.43e-13	4.99988e-11
	0.905	2.27e-12	-8.92e-13	5.00045e-11	3.46e-12	9.21e-13	4.99954e-11
	0.905	2.35e-12	-6.63e-13	5.00033e-11	2.78e-12	1.53e-12	4.99923e-11
	0.906	2.26e-12	-4.34e-13	5.00022e-11	2.48e-12	1.19e-12	4.9994e-11
	0.906	2.16e-12	-1.67e-13	5.00008e-11	2.15e-12	5.14e-13	4.99974e-11
	0.906	2.18e-12	2.33e-14	4.99999e-11	2.79e-12	-6.39e-13	5.00032e-11
	0.906	2.23e-12	5.19e-13	4.99974e-11	2.55e-12	-1.45e-12	5.00072e-11
	0.906	2.25e-12	7.86e-13	4.99961e-11	2.57e-12	-1.39e-12	5.0007e-11
	0.906	2.28e-12	9.77e-13	4.99951e-11	2.75e-12	-1.05e-12	5.00053e-11
	0.906	2.31e-12	7.86e-13	4.99961e-11	2.86e-12	-5.03e-13	5.00025e-11
	0.906	2.28e-12	6.72e-13	4.99966e-11	2.71e-12	5.82e-13	4.99971e-11
	0.906	2.33e-12	5.95e-13	4.9997e-11	3.21e-12	1.46e-12	4.99927e-11
	0.906	2.35e-12	2.33e-14	4.99999e-11	2.83e-12	1.73e-12	4.99914e-11
	0.906	2.25e-12	-2.82e-13	5.00014e-11	3.2e-12	9.21e-13	4.99954e-11
	0.906	2.26e-12	-4.73e-13	5.00024e-11	3.63e-12	-1.64e-13	5.00008e-11
	0.906	2.26e-12	-6.25e-13	5.00031e-11	3.21e-12	-1.11e-12	5.00056e-11
	0.906	2.24e-12	-9.69e-13	5.00048e-11	3.05e-12	-1.59e-12	5.0008e-11
	0.906	2.25e-12	-7.4e-13	5.00037e-11	2.82e-12	-1.32e-12	5.00066e-11
	0.906	2.32e-12	-6.63e-13	5.00033e-11	3.28e-12	-7.07e-13	5.00035e-11
	0.906	2.35e-12	-4.73e-13	5.00024e-11	4e-12	3.91e-14	4.99998e-11
	0.906	2.4e-12	-1.29e-13	5.00006e-11	4.23e-12	8.53e-13	4.99957e-11
	0.906	2.32e-12	-9.12e-14	5.00005e-11	3.56e-12	1.33e-12	4.99934e-11
	0.906	2.32e-12	2.14e-13	4.99989e-11	3.4e-12	1.46e-12	4.99927e-11
	0.907	2.3e-12	7.86e-13	4.99961e-11	3.63e-12	3.1e-13	4.99984e-11
	0.907	2.29e-12	1.05e-12	4.99948e-11	4.11e-12	-6.39e-13	5.00032e-11
	0.907	2.3e-12	1.13e-12	4.99944e-11	4.57e-12	-1.32e-12	5.00066e-11
	0.907	2.27e-12	1.05e-12	4.99948e-11	3.67e-12	-1.45e-12	5.00072e-11
	0.907	2.37e-12	9.01e-13	4.99955e-11	3.47e-12	-7.07e-13	5.00035e-11
	0.907	2.32e-12	4.05e-13	4.9998e-11	4.39e-12	-1.64e-13	5.00008e-11
	0.907	2.25e-12	-5.3e-14	5.00003e-11	4.47e-12	5.14e-13	4.99974e-11
	0.907	2.25e-12	-5.49e-13	5.00027e-11	4.35e-12	1.53e-12	4.99923e-11
	0.907	2.3e-12	-8.16e-13	5.00041e-11	4.42e-12	1.33e-12	4.99934e-11
	0.907	2.3e-12	-1.2e-12	5.0006e-11	3.75e-12	9.89e-13	4.99951e-11
	0.907	2.19e-12	-1.04e-12	5.00052e-11	4.39e-12	-1.64e-13	5.00008e-11
	0.907	2.22e-12	-8.92e-13	5.00045e-11	4.5e-12	-1.25e-12	5.00063e-11
	0.907	2.28e-12	-8.92e-13	5.00045e-11	4.41e-12	-1.52e-12	5.00076e-11
	0.907	2.27e-12	-5.11e-13	5.00026e-11	4.77e-12	-1.32e-12	5.00066e-11
	0.907	2.35e-12	-2.82e-13	5.00014e-11	4.47e-12	-4.36e-13	5.00022e-11
	0.907	2.23e-12	2.52e-13	4.99987e-11	4.17e-12	-1.64e-13	5.00008e-11
	0.907	2.13e-12	5.95e-13	4.9997e-11	3.51e-12	7.17e-13	4.99964e-11
	0.907	2.14e-12	9.01e-13	4.99955e-11	4.23e-12	1.87e-12	4.99907e-11
	0.907	2.27e-12	1.13e-12	4.99944e-11	4.39e-12	1.4e-12	4.9993e-11
	0.907	2.21e-12	9.77e-13	4.99951e-11	3.71e-12	4.46e-13	4.99978e-11
	0.908	2.18e-12	8.63e-13	4.99957e-11	3.61e-12	-7.07e-13	5.00035e-11
	0.908	2.25e-12	8.24e-13	4.99959e-11	3.46e-12	-1.39e-12	5.0007e-11
	0.908	2.27e-12	4.05e-13	4.9998e-11	2.78e-12	-1.59e-12	5.0008e-11
	0.908	2.22e-12	-1.67e-13	5.00008e-11	2.82e-12	-1.11e-12	5.00056e-11
	0.908	2.15e-12	-4.34e-13	5.00022e-11	2.8e-12	-3e-13	5.00015e-11
	0.908	2.19e-12	-9.3e-13	5.00047e-11	2.82e-12	6.49e-13	4.99968e-11
	0.908	2.19e-12	-1.12e-12	5.00056e-11	1.64e-12	1.46e-12	4.99927e-11
	0.908	2.25e-12	-1.27e-12	5.00064e-11	1.84e-12	1.94e-12	4.99903e-11
	0.908	2.32e-12	-1.2e-12	5.0006e-11	2.57e-12	1.12e-12	4.99944e-11
	0.908	2.25e-12	-1.01e-12	5.00051e-11	2.79e-12	-1.64e-13	5.00008e-11
	0.908	2.27e-12	-4.73e-13	5.00024e-11	2.37e-12	-9.78e-13	5.00049e-11
	0.908	2.26e-12	-5.3e-14	5.00003e-11	2.19e-12	-1.59e-12	5.0008e-11
	0.908	2.17e-12	4.05e-13	4.9998e-11	2.26e-12	-1.18e-12	5.00059e-11
	0.908	2.2e-12	7.48e-13	4.99963e-11	2.4e-12	-9.78e-13	5.00049e-11
	0.908	2.24e-12	1.17e-12	4.99942e-11	2.52e-12	1.07e-13	4.99995e-11
	0.908	2.32e-12	1.24e-12	4.99938e-11	2.47e-12	9.21e-13	4.99954e-11
	0.908	2.38e-12	1.05e-12	4.99948e-11	2.68e-12	1.46e-12	4.99927e-11
	0.908	2.27e-12	1.09e-12	4.99946e-11	2.93e-12	1.4e-12	4.9993e-11
	0.908	2.17e-12	5.57e-13	4.99972e-11	2.74e-12	4.46e-13	4.99978e-11
	0.908	2.25e-12	2.52e-13	4.99987e-11	2.93e-12	-6.39e-13	5.00032e-11
	0.909	2.32e-12	-3.58e-13	5.00018e-11	3.74e-12	-1.18e-12	5.00059e-11
	0.909	2.29e-12	-8.54e-13	5.00043e-11	3.77e-12	-1.86e-12	5.00093e-11
	0.909	2.26e-12	-8.92e-13	5.00045e-11	3.92e-12	-1.05e-12	5.00053e-11
	0.909	2.32e-12	-1.24e-12	5.00062e-11	3.93e-12	-3.68e-13	5.00018e-11
	0.909	2.37e-12	-1.31e-12	5.00066e-11	2.97e-12	8.53e-13	4.99957e-11
	0.909	2.32e-12	-8.54e-13	5.00043e-11	3.14e-12	1.6e-12	4.9992e-11
	0.909	2.27e-12	-8.16e-13	5.00041e-11	3.24e-12	1.6e-12	4.9992e-11
	0.909	2.22e-12	-3.96e-13	5.0002e-11	3.31e-12	9.21e-13	4.99954e-11
	0.909	2.22e-12	-5.3e-14	5.00003e-11	2.97e-12	-1.64e-13	5.00008e-11
	0.909	2.25e-12	2.52e-13	4.99987e-11	3.31e-12	-1.11e-12	5.00056e-11
	0.909	2.28e-12	6.72e-13	4.99966e-11	4.01e-12	-1.45e-12	5.00072e-11
	0.909	2.29e-12	9.39e-13	4.99953e-11	3.98e-12	-1.45e-12	5.00072e-11
	0.909	2.35e-12	1.13e-12	4.99944e-11	4.15e-12	-7.07e-13	5.00035e-11
	0.909	2.31e-12	1.09e-12	4.99946e-11	4.16e-12	-2.87e-14	5.00001e-11
	0.909	2.36e-12	9.77e-13	4.99951e-11	3.54e-12	1.33e-12	4.99934e-11
	0.909	2.29e-12	5.95e-13	4.9997e-11	3.82e-12	1.8e-12	4.9991e-11
	0.909	2.28e-12	-1.49e-14	5.00001e-11	3.51e-12	1.33e-12	4.99934e-11
	0.909	2.27e-12	-3.58e-13	5.00018e-11	3.92e-12	3.1e-13	4.99984e-11
	0.909	2.25e-12	-6.25e-13	5.00031e-11	4.61e-12	-7.75e-13	5.00039e-11
	0.909	2.24e-12	-1.12e-12	5.00056e-11	3.86e-12	-1.32e-12	5.00066e-11
	0.91	2.32e-12	-1.2e-12	5.0006e-11	4.09e-12	-1.45e-12	5.00072e-11
	0.91	2.25e-12	-1.08e-12	5.00054e-11	4.15e-12	-1.11e-12	5.00056e-11
	0.91	2.28e-12	-8.54e-13	5.00043e-11	3.06e-12	-2.32e-13	5.00012e-11
	0.91	2.35e-12	-5.87e-13	5.00029e-11	2.98e-12	7.85e-13	4.99961e-11
	0.91	2.32e-12	-3.2e-13	5.00016e-11	3.27e-12	1.73e-12	4.99914e-11
	0.91	2.34e-12	1.76e-13	4.99991e-11	3.93e-12	1.67e-12	4.99917e-11
	0.91	2.28e-12	5.57e-13	4.99972e-11	3.78e-12	1.06e-12	4.99947e-11
	0.91	2.34e-12	1.05e-12	4.99948e-11	4.12e-12	-3e-13	5.00015e-11
	0.91	2.34e-12	1.36e-12	4.99932e-11	3.9e-12	-9.78e-13	5.00049e-11
	0.91	2.28e-12	1.17e-12	4.99942e-11	3.71e-12	-1.39e-12	5.0007e-11
	0.91	2.29e-12	9.77e-13	4.99951e-11	3.75e-12	-1.18e-12	5.00059e-11
	0.91	2.24e-12	7.86e-13	4.99961e-11	3.59e-12	-8.43e-13	5.00042e-11
	0.91	2.24e-12	2.9e-13	4.99986e-11	3.82e-12	4.46e-13	4.99978e-11
	0.91	2.27e-12	-3.2e-13	5.00016e-11	3.5e-12	1.4e-12	4.9993e-11
	0.91	2.3e-12	-6.25e-13	5.00031e-11	3.36e-12	1.53e-12	4.99923e-11
	0.91	2.34e-12	-1.12e-12	5.00056e-11	3.2e-12	1.26e-12	4.99937e-11
	0.91	2.35e-12	-1.35e-12	5.00068e-11	3.65e-12	3.1e-13	4.99984e-11
	0.91	2.36e-12	-1.31e-12	5.00066e-11	3.4e-12	-7.75e-13	5.00039e-11
	0.91	2.29e-12	-1.12e-12	5.00056e-11	3.67e-12	-1.32e-12	5.00066e-11
	0.91	2.32e-12	-8.54e-13	5.00043e-11	4.04e-12	-1.52e-12	5.00076e-11
	0.911	2.26e-12	-5.49e-13	5.00027e-11	3.82e-12	-9.78e-13	5.00049e-11
	0.911	2.23e-12	-1.49e-14	5.00001e-11	3.44e-12	-2.32e-13	5.00012e-11
	0.911	2.23e-12	2.9e-13	4.99986e-11	3.44e-12	7.17e-13	4.99964e-11
	0.911	2.42e-12	9.01e-13	4.99955e-11	2.94e-12	1.6e-12	4.9992e-11
	0.911	2.45e-12	1.02e-12	4.99949e-11	2.6e-12	1.53e-12	4.99923e-11
	0.911	2.34e-12	1.21e-12	4.99939e-11	3.08e-12	7.85e-13	4.99961e-11
	0.911	2.25e-12	1.28e-12	4.99936e-11	2.45e-12	-2.32e-13	5.00012e-11
	0.911	2.33e-12	1.24e-12	4.99938e-11	1.95e-12	-1.11e-12	5.00056e-11
	0.911	2.31e-12	8.24e-13	4.99959e-11	1.9e-12	-1.39e-12	5.0007e-11
	0.911	2.31e-12	3.28e-13	4.99984e-11	1.46e-12	-1.39e-12	5.0007e-11
	0.911	2.37e-12	-2.44e-13	5.00012e-11	2.1e-12	-7.07e-13	5.00035e-11
	0.911	2.44e-12	-5.49e-13	5.00027e-11	1.69e-12	3.78e-13	4.99981e-11
	0.911	2.4e-12	-1.24e-12	5.00062e-11	1.64e-12	1.4e-12	4.9993e-11
	0.911	2.34e-12	-1.35e-12	5.00068e-11	1.83e-12	1.6e-12	4.9992e-11
	0.911	2.3e-12	-1.31e-12	5.00066e-11	1.88e-12	1.46e-12	4.99927e-11
	0.911	2.22e-12	-1.2e-12	5.0006e-11	2.11e-12	2.43e-13	4.99988e-11
	0.911	2.32e-12	-6.25e-13	5.00031e-11	2.38e-12	-6.39e-13	5.00032e-11
	0.911	2.43e-12	-2.06e-13	5.0001e-11	1.95e-12	-1.39e-12	5.0007e-11
	0.911	2.4e-12	2.14e-13	4.99989e-11	2.15e-12	-1.59e-12	5.0008e-11
	0.911	2.33e-12	7.48e-13	4.99963e-11	2e-12	-1.11e-12	5.00056e-11
	0.912	2.44e-12	1.05e-12	4.99948e-11	1.96e-12	-1.64e-13	5.00008e-11
	0.912	2.42e-12	1.47e-12	4.99927e-11	2.06e-12	1.06e-12	4.99947e-11
	0.912	2.32e-12	1.59e-12	4.99921e-11	2.13e-12	1.6e-12	4.9992e-11
	0.912	2.26e-12	1.43e-12	4.99929e-11	1.91e-12	1.67e-12	4.99917e-11
	0.912	2.28e-12	1.02e-12	4.99949e-11	1.83e-12	1.19e-12	4.9994e-11
	0.912	2.31e-12	4.43e-13	4.99978e-11	2e-12	-3.68e-13	5.00018e-11
	0.912	2.41e-12	-1.49e-14	5.00001e-11	2.06e-12	-8.43e-13	5.00042e-11
	0.912	2.38e-12	-5.49e-13	5.00027e-11	2.33e-12	-1.79e-12	5.0009e-11
	0.912	2.34e-12	-9.69e-13	5.00048e-11	2.22e-12	-1.59e-12	5.0008e-11
	0.912	2.22e-12	-1.31e-12	5.00066e-11	3.02e-12	-9.78e-13	5.00049e-11
	0.912	2.25e-12	-1.39e-12	5.0007e-11	2.86e-12	5.14e-13	4.99974e-11
	0.912	2.38e-12	-1.12e-12	5.00056e-11	3.08e-12	1.4e-12	4.9993e-11
	0.912	2.5e-12	-1.27e-12	5.00064e-11	2.74e-12	1.73e-12	4.99914e-11
	0.912	2.42e-12	-1.01e-12	5.00051e-11	2.74e-12	1.26e-12	4.99937e-11
	0.912	2.27e-12	-2.06e-13	5.0001e-11	2.47e-12	1.75e-13	4.99991e-11
	0.912	2.3e-12	6.14e-14	4.99997e-11	2.37e-12	-6.39e-13	5.00032e-11
	0.912	2.34e-12	6.34e-13	4.99968e-11	2.64e-12	-1.66e-12	5.00083e-11
	0.912	2.36e-12	1.13e-12	4.99944e-11	2.52e-12	-1.72e-12	5.00086e-11
	0.912	2.32e-12	1.51e-12	4.99924e-11	2.22e-12	-1.32e-12	5.00066e-11
	0.912	2.3e-12	1.55e-12	4.99922e-11	2.26e-12	-2.87e-14	5.00001e-11
	0.913	2.24e-12	1.36e-12	4.99932e-11	2.74e-12	1.12e-12	4.99944e-11
	0.913	2.24e-12	1.17e-12	4.99942e-11	2.44e-12	1.67e-12	4.99917e-11
	0.913	2.31e-12	3.67e-13	4.99982e-11	2.57e-12	1.67e-12	4.99917e-11
	0.913	2.25e-12	-1.49e-14	5.00001e-11	1.83e-12	6.49e-13	4.99968e-11
	0.913	2.25e-12	-7.02e-13	5.00035e-11	2.21e-12	-3.68e-13	5.00018e-11
	0.913	2.28e-12	-1.24e-12	5.00062e-11	2.76e-12	-1.25e-12	5.00063e-11
	0.913	2.25e-12	-1.35e-12	5.00068e-11	2.63e-12	-1.93e-12	5.00097e-11
	0.913	2.28e-12	-1.27e-12	5.00064e-11	2.78e-12	-1.66e-12	5.00083e-11
	0.913	2.28e-12	-1.31e-12	5.00066e-11	2.26e-12	-8.43e-13	5.00042e-11
	0.913	2.3e-12	-1.12e-12	5.00056e-11	1.65e-12	5.14e-13	4.99974e-11
	0.913	2.21e-12	-6.63e-13	5.00033e-11	1.76e-12	1.46e-12	4.99927e-11
	0.913	2.23e-12	-1.49e-14	5.00001e-11	1.9e-12	1.73e-12	4.99914e-11
	0.913	2.2e-12	5.19e-13	4.99974e-11	1.39e-12	1.33e-12	4.99934e-11
	0.913	2.19e-12	9.77e-13	4.99951e-11	1.04e-12	2.43e-13	4.99988e-11
	0.913	2.23e-12	1.24e-12	4.99938e-11	1.33e-12	-9.1e-13	5.00046e-11
	0.913	2.26e-12	1.36e-12	4.99932e-11	2.19e-12	-1.32e-12	5.00066e-11
	0.913	2.36e-12	1.4e-12	4.9993e-11	2.24e-12	-1.52e-12	5.00076e-11
	0.913	2.25e-12	1.02e-12	4.99949e-11	2.06e-12	-1.05e-12	5.00053e-11
	0.913	2.16e-12	7.86e-13	4.99961e-11	1.26e-12	-2.87e-14	5.00001e-11
	0.913	2.16e-12	-1.49e-14	5.00001e-11	2.24e-12	1.06e-12	4.99947e-11
	0.914	2.17e-12	-3.96e-13	5.0002e-11	2.25e-12	1.87e-12	4.99907e-11
	0.914	2.22e-12	-8.92e-13	5.00045e-11	2e-12	1.33e-12	4.99934e-11
	0.914	2.27e-12	-1.24e-12	5.00062e-11	1.68e-12	6.49e-13	4.99968e-11
	0.914	2.31e-12	-1.27e-12	5.00064e-11	1.88e-12	-6.39e-13	5.00032e-11
	0.914	2.28e-12	-1.27e-12	5.00064e-11	2.07e-12	-1.32e-12	5.00066e-11
	0.914	2.29e-12	-1.43e-12	5.00071e-11	2.07e-12	-1.66e-12	5.00083e-11
	0.914	2.28e-12	-1.04e-12	5.00052e-11	2.05e-12	-1.52e-12	5.00076e-11
	0.914	2.2e-12	-3.2e-13	5.00016e-11	2.33e-12	-5.03e-13	5.00025e-11
	0.914	2.18e-12	4.43e-13	4.99978e-11	2.4e-12	5.82e-13	4.99971e-11
	0.914	2.25e-12	5.95e-13	4.9997e-11	2.36e-12	1.46e-12	4.99927e-11
	0.914	2.23e-12	1.17e-12	4.99942e-11	2.21e-12	1.53e-12	4.99923e-11
	0.914	2.13e-12	1.63e-12	4.99919e-11	2.18e-12	1.19e-12	4.9994e-11
	0.914	2.15e-12	1.7e-12	4.99915e-11	2.21e-12	-2.87e-14	5.00001e-11
	0.914	2.22e-12	1.51e-12	4.99924e-11	2.28e-12	-1.05e-12	5.00053e-11
	0.914	2.25e-12	1.17e-12	4.99942e-11	2.24e-12	-1.45e-12	5.00072e-11
	0.914	2.26e-12	3.67e-13	4.99982e-11	2.38e-12	-1.39e-12	5.0007e-11
	0.914	2.25e-12	-3.2e-13	5.00016e-11	2.43e-12	-9.78e-13	5.00049e-11
	0.914	2.25e-12	-7.02e-13	5.00035e-11	3.08e-12	3.91e-14	4.99998e-11
	0.914	2.22e-12	-1.01e-12	5.00051e-11	2.76e-12	1.33e-12	4.99934e-11
	0.914	2.2e-12	-1.43e-12	5.00071e-11	2.66e-12	1.46e-12	4.99927e-11
	0.915	2.2e-12	-1.66e-12	5.00083e-11	2.94e-12	1.4e-12	4.9993e-11
	0.915	2.25e-12	-1.35e-12	5.00068e-11	3.21e-12	5.14e-13	4.99974e-11
	0.915	2.26e-12	-1.2e-12	5.0006e-11	3.02e-12	-3e-13	5.00015e-11
	0.915	2.12e-12	-3.58e-13	5.00018e-11	2.71e-12	-1.18e-12	5.00059e-11
	0.915	2.17e-12	2.33e-14	4.99999e-11	2.72e-12	-1.79e-12	5.0009e-11
	0.915	2.3e-12	5.19e-13	4.99974e-11	3.1e-12	-1.39e-12	5.0007e-11
	0.915	2.25e-12	1.02e-12	4.99949e-11	2.72e-12	-3.68e-13	5.00018e-11
	0.915	2.15e-12	1.47e-12	4.99927e-11	3.02e-12	7.17e-13	4.99964e-11
	0.915	2.25e-12	1.47e-12	4.99927e-11	2.9e-12	1.4e-12	4.9993e-11
	0.915	2.32e-12	1.51e-12	4.99924e-11	2.93e-12	1.67e-12	4.99917e-11
	0.915	2.31e-12	1.21e-12	4.99939e-11	3.01e-12	1.06e-12	4.99947e-11
	0.915	2.23e-12	7.1e-13	4.99965e-11	2.29e-12	-3e-13	5.00015e-11
	0.915	2.15e-12	-1.67e-13	5.00008e-11	2.66e-12	-1.05e-12	5.00053e-11
	0.915	2.05e-12	-4.73e-13	5.00024e-11	2.74e-12	-1.45e-12	5.00072e-11
	0.915	2.19e-12	-9.69e-13	5.00048e-11	2.17e-12	-1.86e-12	5.00093e-11
	0.915	2.27e-12	-1.5e-12	5.00075e-11	2.09e-12	-1.05e-12	5.00053e-11
	0.915	2.27e-12	-1.62e-12	5.00081e-11	1.53e-12	-2.87e-14	5.00001e-11
	0.915	2.22e-12	-1.66e-12	5.00083e-11	9.6e-13	1.06e-12	4.99947e-11
	0.915	2.35e-12	-1.5e-12	5.00075e-11	1.12e-12	1.46e-12	4.99927e-11
	0.915	2.4e-12	-1.24e-12	5.00062e-11	1.57e-12	1.4e-12	4.9993e-11
	0.916	2.32e-12	-5.11e-13	5.00026e-11	2e-12	6.49e-13	4.99968e-11
	0.916	2.2e-12	6.14e-14	4.99997e-11	1.73e-12	-2.32e-13	5.00012e-11
	0.916	2.08e-12	7.48e-13	4.99963e-11	1.71e-12	-1.18e-12	5.00059e-11
	0.916	2.11e-12	1.4e-12	4.9993e-11	1.81e-12	-1.72e-12	5.00086e-11
	0.916	2.21e-12	1.89e-12	4.99906e-11	1.1e-12	-1.25e-12	5.00063e-11
	0.916	2.3e-12	1.78e-12	4.99911e-11	1.23e-12	-7.75e-13	5.00039e-11
	0.916	2.29e-12	1.63e-12	4.99919e-11	8.79e-13	8.53e-13	4.99957e-11
	0.916	2.25e-12	1.13e-12	4.99944e-11	1.27e-12	1.53e-12	4.99923e-11
	0.916	2.15e-12	6.34e-13	4.99968e-11	1.68e-12	1.53e-12	4.99923e-11
	0.916	2.25e-12	2.14e-13	4.99989e-11	1.52e-12	1.19e-12	4.9994e-11
	0.916	2.28e-12	-5.11e-13	5.00026e-11	1.68e-12	2.43e-13	4.99988e-11
	0.916	2.25e-12	-1.08e-12	5.00054e-11	1.53e-12	-7.75e-13	5.00039e-11
	0.916	2.23e-12	-1.62e-12	5.00081e-11	1.88e-12	-1.39e-12	5.0007e-11
	0.916	2.23e-12	-1.62e-12	5.00081e-11	1.95e-12	-1.72e-12	5.00086e-11
	0.916	2.21e-12	-1.43e-12	5.00071e-11	2.03e-12	-7.75e-13	5.00039e-11
	0.916	2.15e-12	-1.27e-12	5.00064e-11	1.84e-12	1.75e-13	4.99991e-11
	0.916	2.23e-12	-7.4e-13	5.00037e-11	1.72e-12	1.33e-12	4.99934e-11
	0.916	2.24e-12	-3.2e-13	5.00016e-11	2.05e-12	1.73e-12	4.99914e-11
	0.916	2.14e-12	2.52e-13	4.99987e-11	2.49e-12	1.26e-12	4.99937e-11
	0.916	2.19e-12	1.02e-12	4.99949e-11	1.88e-12	5.82e-13	4.99971e-11
	0.917	2.22e-12	1.28e-12	4.99936e-11	1.62e-12	-3e-13	5.00015e-11
	0.917	2.2e-12	1.59e-12	4.99921e-11	1.6e-12	-1.52e-12	5.00076e-11
	0.917	2.15e-12	1.59e-12	4.99921e-11	9.6e-13	-1.86e-12	5.00093e-11
	0.917	2.18e-12	1.43e-12	4.99929e-11	8.52e-13	-1.52e-12	5.00076e-11
	0.917	2.21e-12	1.02e-12	4.99949e-11	1.27e-12	-2.32e-13	5.00012e-11
	0.917	2.25e-12	1.76e-13	4.99991e-11	1.48e-12	9.89e-13	4.99951e-11
	0.917	2.25e-12	-3.96e-13	5.0002e-11	1.5e-12	1.67e-12	4.99917e-11
	0.917	2.27e-12	-9.3e-13	5.00047e-11	7.57e-13	1.73e-12	4.99914e-11
	0.917	2.33e-12	-1.43e-12	5.00071e-11	1.73e-13	1.06e-12	4.99947e-11
	0.917	2.38e-12	-1.88e-12	5.00094e-11	-3e-14	2.43e-13	4.99988e-11
	0.917	2.22e-12	-1.81e-12	5.00091e-11	-5.71e-14	-9.78e-13	5.00049e-11
	0.917	2.12e-12	-1.54e-12	5.00077e-11	-4.23e-13	-1.79e-12	5.0009e-11
	0.917	2.09e-12	-8.92e-13	5.00045e-11	-3.15e-13	-1.66e-12	5.00083e-11
	0.917	2.19e-12	-4.73e-13	5.00024e-11	-2.47e-13	-8.43e-13	5.00042e-11
	0.917	2.18e-12	9.96e-14	4.99995e-11	-2.06e-13	2.43e-13	4.99988e-11
	0.917	2.26e-12	7.86e-13	4.99961e-11	3.79e-14	1.12e-12	4.99944e-11
	0.917	2.3e-12	1.24e-12	4.99938e-11	7.3e-13	1.4e-12	4.9993e-11
	0.917	2.21e-12	1.85e-12	4.99908e-11	1.24e-12	1.33e-12	4.99934e-11
	0.917	2.27e-12	1.82e-12	4.99909e-11	1.98e-12	6.49e-13	4.99968e-11
	0.917	2.26e-12	1.59e-12	4.99921e-11	2.52e-12	-3e-13	5.00015e-11
	0.918	2.18e-12	1.09e-12	4.99946e-11	2.03e-12	-1.32e-12	5.00066e-11
	0.918	2.15e-12	6.34e-13	4.99968e-11	1.67e-12	-1.79e-12	5.0009e-11
	0.918	2.17e-12	-9.12e-14	5.00005e-11	1.94e-12	-1.52e-12	5.00076e-11
	0.918	2.17e-12	-6.63e-13	5.00033e-11	1.95e-12	-3e-13	5.00015e-11
	0.918	2.07e-12	-1.04e-12	5.00052e-11	2.71e-12	9.89e-13	4.99951e-11
	0.918	2.12e-12	-1.35e-12	5.00068e-11	2.21e-12	1.73e-12	4.99914e-11
	0.918	2.22e-12	-1.73e-12	5.00086e-11	2e-12	1.73e-12	4.99914e-11
	0.918	2.22e-12	-1.5e-12	5.00075e-11	2.71e-12	9.89e-13	4.99951e-11
	0.918	2.23e-12	-1.24e-12	5.00062e-11	2.17e-12	2.43e-13	4.99988e-11
	0.918	2.23e-12	-8.54e-13	5.00043e-11	2.17e-12	-1.05e-12	5.00053e-11
	0.918	2.15e-12	-1.29e-13	5.00006e-11	2.22e-12	-1.59e-12	5.0008e-11
	0.918	2.06e-12	6.34e-13	4.99968e-11	1.65e-12	-1.72e-12	5.00086e-11
	0.918	2.09e-12	1.24e-12	4.99938e-11	1.68e-12	-5.71e-13	5.00029e-11
	0.918	2.15e-12	1.59e-12	4.99921e-11	1.6e-12	5.82e-13	4.99971e-11
	0.918	2.19e-12	1.59e-12	4.99921e-11	1.8e-12	1.33e-12	4.99934e-11
	0.918	2.01e-12	1.63e-12	4.99919e-11	2.21e-12	1.6e-12	4.9992e-11
	0.918	2.03e-12	1.55e-12	4.99922e-11	1.61e-12	1.19e-12	4.9994e-11
	0.918	2.17e-12	1.13e-12	4.99944e-11	1.49e-12	5.14e-13	4.99974e-11
	0.918	2.24e-12	4.43e-13	4.99978e-11	1.41e-12	-6.39e-13	5.00032e-11
	0.918	2.21e-12	-4.34e-13	5.00022e-11	1.84e-12	-1.52e-12	5.00076e-11
	0.919	2.15e-12	-1.2e-12	5.0006e-11	2.02e-12	-2e-12	5.001e-11
	0.919	2.15e-12	-1.77e-12	5.00088e-11	1.1e-12	-1.32e-12	5.00066e-11
	0.919	2.16e-12	-1.96e-12	5.00098e-11	1.11e-12	-3e-13	5.00015e-11
	0.919	2.2e-12	-1.96e-12	5.00098e-11	1.56e-12	1.19e-12	4.9994e-11
	0.919	2.15e-12	-1.77e-12	5.00088e-11	1.88e-12	1.46e-12	4.99927e-11
	0.919	2.11e-12	-1.24e-12	5.00062e-11	1.6e-12	1.6e-12	4.9992e-11
	0.919	2.15e-12	-6.63e-13	5.00033e-11	1.76e-12	1.06e-12	4.99947e-11
	0.919	2.22e-12	1.38e-13	4.99993e-11	2.51e-12	1.07e-13	4.99995e-11
	0.919	2.24e-12	8.24e-13	4.99959e-11	3.04e-12	-1.18e-12	5.00059e-11
	0.919	2.23e-12	1.24e-12	4.99938e-11	2.03e-12	-1.93e-12	5.00097e-11
	0.919	2.19e-12	1.93e-12	4.99904e-11	2.22e-12	-1.86e-12	5.00093e-11
	0.919	2.15e-12	1.85e-12	4.99908e-11	2.05e-12	-7.07e-13	5.00035e-11
	0.919	2.13e-12	1.97e-12	4.99902e-11	2.11e-12	6.49e-13	4.99968e-11
	0.919	2.19e-12	1.28e-12	4.99936e-11	2.53e-12	1.33e-12	4.99934e-11
	0.919	2.17e-12	8.24e-13	4.99959e-11	1.79e-12	1.33e-12	4.99934e-11
	0.919	2.19e-12	9.96e-14	4.99995e-11	1.81e-12	1.4e-12	4.9993e-11
	0.919	2.28e-12	-7.4e-13	5.00037e-11	2.57e-12	3.78e-13	4.99981e-11
	0.919	2.34e-12	-1.12e-12	5.00056e-11	2.82e-12	-7.75e-13	5.00039e-11
	0.919	2.3e-12	-1.69e-12	5.00085e-11	2.9e-12	-1.59e-12	5.0008e-11
	0.919	2.26e-12	-1.85e-12	5.00093e-11	2.8e-12	-2.06e-12	5.00103e-11
	0.92	2.24e-12	-1.88e-12	5.00094e-11	2.66e-12	-1.11e-12	5.00056e-11
	0.92	2.1e-12	-1.5e-12	5.00075e-11	2.9e-12	-9.66e-14	5.00005e-11
	0.92	2.25e-12	-1.24e-12	5.00062e-11	2.99e-12	1.12e-12	4.99944e-11
	0.92	2.27e-12	-4.34e-13	5.00022e-11	3.2e-12	1.4e-12	4.9993e-11
	0.92	2.24e-12	2.14e-13	4.99989e-11	2.63e-12	1.4e-12	4.9993e-11
	0.92	2.27e-12	9.39e-13	4.99953e-11	1.71e-12	9.89e-13	4.99951e-11
	0.92	2.41e-12	1.36e-12	4.99932e-11	7.57e-13	-2.32e-13	5.00012e-11
	0.92	2.44e-12	1.63e-12	4.99919e-11	2.82e-13	-1.18e-12	5.00059e-11
	0.92	2.35e-12	1.89e-12	4.99906e-11	3.09e-13	-2e-12	5.001e-11
	0.92	2.35e-12	1.66e-12	4.99917e-11	5.26e-13	-1.79e-12	5.0009e-11
	0.92	2.28e-12	1.13e-12	4.99944e-11	7.02e-13	-7.75e-13	5.00039e-11
	0.92	2.2e-12	5.19e-13	4.99974e-11	4.72e-13	3.78e-13	4.99981e-11
	0.92	2.35e-12	-3.58e-13	5.00018e-11	-5.05e-13	1.53e-12	4.99923e-11
	0.92	2.44e-12	-9.3e-13	5.00047e-11	-5.32e-13	1.67e-12	4.99917e-11
	0.92	2.4e-12	-1.5e-12	5.00075e-11	-9.25e-13	1.46e-12	4.99927e-11
	0.92	2.3e-12	-1.66e-12	5.00083e-11	-1.01e-12	5.82e-13	4.99971e-11
	0.92	2.3e-12	-1.85e-12	5.00093e-11	-1.06e-12	-7.07e-13	5.00035e-11
	0.92	2.35e-12	-1.62e-12	5.00081e-11	-1.43e-12	-1.93e-12	5.00097e-11
	0.92	2.38e-12	-1.2e-12	5.0006e-11	-1.94e-12	-2.2e-12	5.0011e-11
	0.92	2.45e-12	-4.73e-13	5.00024e-11	-1.32e-12	-1.18e-12	5.00059e-11
	0.921	2.44e-12	-5.3e-14	5.00003e-11	-1.3e-12	3.91e-14	4.99998e-11
	0.921	2.47e-12	7.48e-13	4.99963e-11	-1.68e-12	1.12e-12	4.99944e-11
	0.921	2.35e-12	1.13e-12	4.99944e-11	-2.21e-12	1.67e-12	4.99917e-11
	0.921	2.41e-12	1.63e-12	4.99919e-11	-2.2e-12	1.73e-12	4.99914e-11
	0.921	2.41e-12	1.89e-12	4.99906e-11	-1.75e-12	1.26e-12	4.99937e-11
	0.921	2.47e-12	1.55e-12	4.99922e-11	-1.83e-12	3.91e-14	4.99998e-11
	0.921	2.44e-12	1.24e-12	4.99938e-11	-2.06e-12	-1.39e-12	5.0007e-11
	0.921	2.36e-12	6.72e-13	4.99966e-11	-1.49e-12	-2.2e-12	5.0011e-11
	0.921	2.35e-12	2.14e-13	4.99989e-11	-2.05e-12	-1.72e-12	5.00086e-11
	0.921	2.42e-12	-4.34e-13	5.00022e-11	-2.74e-12	-5.03e-13	5.00025e-11
	0.921	2.5e-12	-1.12e-12	5.00056e-11	-2.65e-12	6.49e-13	4.99968e-11
	0.921	2.48e-12	-1.69e-12	5.00085e-11	-2.63e-12	1.4e-12	4.9993e-11
	0.921	2.46e-12	-1.77e-12	5.00088e-11	-2.21e-12	1.8e-12	4.9991e-11
	0.921	2.51e-12	-1.77e-12	5.00088e-11	-2.27e-12	1.33e-12	4.99934e-11
	0.921	2.51e-12	-1.46e-12	5.00073e-11	-2.02e-12	6.49e-13	4.99968e-11
	0.921	2.44e-12	-9.69e-13	5.00048e-11	-1.7e-12	-8.43e-13	5.00042e-11
	0.921	2.44e-12	-2.82e-13	5.00014e-11	-1.68e-12	-1.93e-12	5.00097e-11
	0.921	2.43e-12	2.52e-13	4.99987e-11	-1.82e-12	-1.79e-12	5.0009e-11
	0.921	2.41e-12	7.48e-13	4.99963e-11	-2.23e-12	-9.78e-13	5.00049e-11
	0.921	2.48e-12	1.43e-12	4.99929e-11	-2.02e-12	4.46e-13	4.99978e-11
	0.922	2.41e-12	1.82e-12	4.99909e-11	-1.4e-12	1.12e-12	4.99944e-11
	0.922	2.3e-12	2.08e-12	4.99896e-11	-7.9e-13	1.67e-12	4.99917e-11
	0.922	2.41e-12	1.89e-12	4.99906e-11	-7.76e-13	1.67e-12	4.99917e-11
	0.922	2.45e-12	1.05e-12	4.99948e-11	-7.76e-13	1.06e-12	4.99947e-11
	0.922	2.41e-12	2.9e-13	4.99986e-11	-6.27e-13	-2.87e-14	5.00001e-11
	0.922	2.41e-12	-4.73e-13	5.00024e-11	-9.25e-13	-1.32e-12	5.00066e-11
	0.922	2.48e-12	-1.2e-12	5.0006e-11	-1.01e-12	-2.13e-12	5.00107e-11
	0.922	2.54e-12	-1.69e-12	5.00085e-11	-7.76e-13	-1.59e-12	5.0008e-11
	0.922	2.41e-12	-1.96e-12	5.00098e-11	-8.84e-13	-2.32e-13	5.00012e-11
	0.922	2.35e-12	-1.81e-12	5.00091e-11	-1.26e-12	9.89e-13	4.99951e-11
	0.922	2.38e-12	-1.77e-12	5.00088e-11	-1.3e-12	1.6e-12	4.9992e-11
	0.922	2.4e-12	-1.31e-12	5.00066e-11	-8.17e-13	1.94e-12	4.99903e-11
	0.922	2.35e-12	-6.25e-13	5.00031e-11	-6.4e-13	1.4e-12	4.9993e-11
	0.922	2.43e-12	1.38e-13	4.99993e-11	-4.23e-13	5.82e-13	4.99971e-11
	0.922	2.38e-12	6.34e-13	4.99968e-11	-2.61e-13	-9.1e-13	5.00046e-11
	0.922	2.39e-12	1.36e-12	4.99932e-11	-9.79e-13	-1.72e-12	5.00086e-11
	0.922	2.35e-12	1.85e-12	4.99908e-11	1.07e-14	-2.06e-12	5.00103e-11
	0.922	2.42e-12	1.97e-12	4.99902e-11	1.46e-13	-7.07e-13	5.00035e-11
	0.922	2.44e-12	2.01e-12	4.999e-11	-2.61e-13	1.07e-13	4.99995e-11
	0.922	2.43e-12	1.59e-12	4.99921e-11	-1.25e-13	1.33e-12	4.99934e-11
	0.923	2.42e-12	8.24e-13	4.99959e-11	2.14e-13	1.8e-12	4.9991e-11
	0.923	2.39e-12	-9.12e-14	5.00005e-11	6.62e-13	1.67e-12	4.99917e-11
	0.923	2.32e-12	-4.34e-13	5.00022e-11	1.01e-12	1.12e-12	4.99944e-11
	0.923	2.35e-12	-1.2e-12	5.0006e-11	8.38e-13	-3e-13	5.00015e-11
	0.923	2.37e-12	-1.54e-12	5.00077e-11	1.87e-13	-1.59e-12	5.0008e-11
	0.923	2.34e-12	-1.77e-12	5.00088e-11	2.14e-13	-2.13e-12	5.00107e-11
	0.923	2.38e-12	-1.85e-12	5.00093e-11	1.06e-13	-1.32e-12	5.00066e-11
	0.923	2.48e-12	-1.69e-12	5.00085e-11	7.43e-13	-9.66e-14	5.00005e-11
	0.923	2.51e-12	-1.12e-12	5.00056e-11	4.31e-13	9.21e-13	4.99954e-11
	0.923	2.33e-12	-3.96e-13	5.0002e-11	4.18e-13	1.46e-12	4.99927e-11
	0.923	2.3e-12	4.81e-13	4.99976e-11	7.97e-13	1.67e-12	4.99917e-11
	0.923	2.44e-12	9.01e-13	4.99955e-11	1.22e-12	1.26e-12	4.99937e-11
	0.923	2.44e-12	1.66e-12	4.99917e-11	8.92e-13	3.1e-13	4.99984e-11
	0.923	2.32e-12	1.89e-12	4.99906e-11	8.25e-13	-9.78e-13	5.00049e-11
	0.923	2.3e-12	1.93e-12	4.99904e-11	3.63e-13	-1.72e-12	5.00086e-11
	0.923	2.36e-12	1.89e-12	4.99906e-11	1.19e-13	-1.66e-12	5.00083e-11
	0.923	2.32e-12	1.13e-12	4.99944e-11	9.19e-13	-8.43e-13	5.00042e-11
	0.923	2.31e-12	4.43e-13	4.99978e-11	1.04e-12	7.17e-13	4.99964e-11
	0.923	2.31e-12	-1.67e-13	5.00008e-11	1.77e-12	1.33e-12	4.99934e-11
	0.923	2.32e-12	-7.78e-13	5.00039e-11	1.94e-12	1.53e-12	4.99923e-11
	0.924	2.35e-12	-1.43e-12	5.00071e-11	1.54e-12	1.53e-12	4.99923e-11
	0.924	2.45e-12	-1.58e-12	5.00079e-11	1.37e-12	5.82e-13	4.99971e-11
	0.924	2.45e-12	-1.62e-12	5.00081e-11	1.33e-12	-6.39e-13	5.00032e-11
	0.924	2.35e-12	-1.66e-12	5.00083e-11	1.98e-12	-1.66e-12	5.00083e-11
	0.924	2.32e-12	-1.31e-12	5.00066e-11	2.09e-12	-2.06e-12	5.00103e-11
	0.924	2.28e-12	-6.25e-13	5.00031e-11	2.41e-12	-1.25e-12	5.00063e-11
	0.924	2.31e-12	-2.44e-13	5.00012e-11	2.74e-12	-1.64e-13	5.00008e-11
	0.924	2.31e-12	3.28e-13	4.99984e-11	2.74e-12	8.53e-13	4.99957e-11
	0.924	2.32e-12	1.17e-12	4.99942e-11	2.56e-12	1.53e-12	4.99923e-11
	0.924	2.3e-12	1.43e-12	4.99929e-11	2.15e-12	1.67e-12	4.99917e-11
	0.924	2.35e-12	1.85e-12	4.99908e-11	2.3e-12	1.12e-12	4.99944e-11
	0.924	2.51e-12	1.78e-12	4.99911e-11	2.47e-12	1.07e-13	4.99995e-11
	0.924	2.44e-12	1.43e-12	4.99929e-11	2.36e-12	-1.25e-12	5.00063e-11
	0.924	2.25e-12	1.05e-12	4.99948e-11	2.37e-12	-2.06e-12	5.00103e-11
	0.924	2.25e-12	4.81e-13	4.99976e-11	2.68e-12	-1.66e-12	5.00083e-11
	0.924	2.29e-12	-3.2e-13	5.00016e-11	2.72e-12	-5.71e-13	5.00029e-11
	0.924	2.41e-12	-8.16e-13	5.00041e-11	2.83e-12	3.78e-13	4.99981e-11
	0.924	2.35e-12	-1.35e-12	5.00068e-11	2.49e-12	1.46e-12	4.99927e-11
	0.924	2.41e-12	-1.5e-12	5.00075e-11	2.36e-12	1.53e-12	4.99923e-11
	0.924	2.32e-12	-1.73e-12	5.00086e-11	2.51e-12	1.73e-12	4.99914e-11
	0.925	2.37e-12	-1.62e-12	5.00081e-11	2.91e-12	7.85e-13	4.99961e-11
	0.925	2.39e-12	-1.27e-12	5.00064e-11	3.65e-12	-2.32e-13	5.00012e-11
	0.925	2.43e-12	-7.02e-13	5.00035e-11	3.28e-12	-1.86e-12	5.00093e-11
	0.925	2.48e-12	-5.3e-14	5.00003e-11	3.46e-12	-2e-12	5.001e-11
	0.925	2.37e-12	4.43e-13	4.99978e-11	3.4e-12	-1.32e-12	5.00066e-11
	0.925	2.33e-12	1.21e-12	4.99939e-11	3.35e-12	-2.87e-14	5.00001e-11
	0.925	2.25e-12	1.66e-12	4.99917e-11	3.13e-12	8.53e-13	4.99957e-11
	0.925	2.22e-12	1.63e-12	4.99919e-11	2.82e-12	1.73e-12	4.99914e-11
	0.925	2.37e-12	1.74e-12	4.99913e-11	2.95e-12	1.8e-12	4.9991e-11
	0.925	2.5e-12	1.24e-12	4.99938e-11	3.02e-12	1.06e-12	4.99947e-11
	0.925	2.45e-12	4.43e-13	4.99978e-11	2.78e-12	3.91e-14	4.99998e-11
	0.925	2.4e-12	-2.06e-13	5.0001e-11	2.68e-12	-1.59e-12	5.0008e-11
	0.925	2.42e-12	-8.16e-13	5.00041e-11	2.33e-12	-2.06e-12	5.00103e-11
	0.925	2.44e-12	-1.08e-12	5.00054e-11	2.47e-12	-1.59e-12	5.0008e-11
	0.925	2.4e-12	-1.5e-12	5.00075e-11	2.83e-12	-5.03e-13	5.00025e-11
	0.925	2.4e-12	-1.58e-12	5.00079e-11	2.74e-12	5.14e-13	4.99974e-11
	0.925	2.27e-12	-1.54e-12	5.00077e-11	2.43e-12	1.26e-12	4.99937e-11
	0.925	2.25e-12	-1.31e-12	5.00066e-11	2.41e-12	1.94e-12	4.99903e-11
	0.925	2.31e-12	-6.63e-13	5.00033e-11	3.35e-12	1.67e-12	4.99917e-11
	0.925	2.48e-12	-5.3e-14	5.00003e-11	3.59e-12	6.49e-13	4.99968e-11
	0.926	2.5e-12	4.81e-13	4.99976e-11	3.47e-12	-1.05e-12	5.00053e-11
	0.926	2.48e-12	1.09e-12	4.99946e-11	3.46e-12	-1.93e-12	5.00097e-11
	0.926	2.32e-12	1.51e-12	4.99924e-11	3.9e-12	-2.13e-12	5.00107e-11
	0.926	2.29e-12	1.85e-12	4.99908e-11	4.6e-12	-1.05e-12	5.00053e-11
	0.926	2.44e-12	1.78e-12	4.99911e-11	4.6e-12	1.75e-13	4.99991e-11
	0.926	2.48e-12	1.47e-12	4.99927e-11	4.19e-12	1.06e-12	4.99947e-11
	0.926	2.45e-12	1.02e-12	4.99949e-11	4e-12	1.67e-12	4.99917e-11
	0.926	2.38e-12	3.28e-13	4.99984e-11	3.65e-12	1.8e-12	4.9991e-11
	0.926	2.28e-12	-1.49e-14	5.00001e-11	3.52e-12	1.06e-12	4.99947e-11
	0.926	2.28e-12	-6.25e-13	5.00031e-11	3.43e-12	-2.87e-14	5.00001e-11
	0.926	2.44e-12	-1.46e-12	5.00073e-11	3.28e-12	-1.52e-12	5.00076e-11
	0.926	2.5e-12	-1.81e-12	5.00091e-11	3.25e-12	-2.06e-12	5.00103e-11
	0.926	2.46e-12	-1.77e-12	5.00088e-11	3.18e-12	-1.72e-12	5.00086e-11
	0.926	2.41e-12	-1.77e-12	5.00088e-11	2.49e-12	-6.39e-13	5.00032e-11
	0.926	2.38e-12	-1.35e-12	5.00068e-11	2.71e-12	5.82e-13	4.99971e-11
	0.926	2.25e-12	-7.78e-13	5.00039e-11	2.72e-12	1.4e-12	4.9993e-11
	0.926	2.25e-12	1.38e-13	4.99993e-11	2.49e-12	1.8e-12	4.9991e-11
	0.926	2.35e-12	6.72e-13	4.99966e-11	2.43e-12	1.46e-12	4.99927e-11
	0.926	2.41e-12	1.51e-12	4.99924e-11	2.22e-12	5.82e-13	4.99971e-11
	0.926	2.34e-12	1.7e-12	4.99915e-11	2.67e-12	-8.43e-13	5.00042e-11
	0.927	2.34e-12	1.89e-12	4.99906e-11	2.48e-12	-2.06e-12	5.00103e-11
	0.927	2.32e-12	1.51e-12	4.99924e-11	2.15e-12	-2.06e-12	5.00103e-11
	0.927	2.33e-12	1.21e-12	4.99939e-11	2.05e-12	-1.11e-12	5.00056e-11
	0.927	2.42e-12	6.34e-13	4.99968e-11	2.24e-12	1.07e-13	4.99995e-11
	0.927	2.41e-12	-5.3e-14	5.00003e-11	2.63e-12	1.19e-12	4.9994e-11
	0.927	2.24e-12	-2.82e-13	5.00014e-11	3.1e-12	1.73e-12	4.99914e-11
	0.927	2.2e-12	-8.92e-13	5.00045e-11	2.82e-12	1.6e-12	4.9992e-11
	0.927	2.28e-12	-1.24e-12	5.00062e-11	2.48e-12	1.12e-12	4.99944e-11
	0.927	2.27e-12	-1.5e-12	5.00075e-11	2.26e-12	-6.39e-13	5.00032e-11
	0.927	2.31e-12	-1.77e-12	5.00088e-11	1.91e-12	-1.66e-12	5.00083e-11
	0.927	2.34e-12	-1.39e-12	5.0007e-11	2.15e-12	-2e-12	5.001e-11
	0.927	2.24e-12	-1.08e-12	5.00054e-11	2.15e-12	-1.25e-12	5.00063e-11
	0.927	2.23e-12	-5.87e-13	5.00029e-11	1.53e-12	-2.32e-13	5.00012e-11
	0.927	2.22e-12	2.14e-13	4.99989e-11	1.3e-12	7.85e-13	4.99961e-11
	0.927	2.26e-12	1.02e-12	4.99949e-11	1.41e-12	1.4e-12	4.9993e-11
	0.927	2.2e-12	1.63e-12	4.99919e-11	1.49e-12	1.94e-12	4.99903e-11
	0.927	2.28e-12	1.74e-12	4.99913e-11	1.2e-12	9.89e-13	4.99951e-11
	0.927	2.35e-12	1.74e-12	4.99913e-11	1.19e-12	3.1e-13	4.99984e-11
	0.927	2.32e-12	1.4e-12	4.9993e-11	9.33e-13	-8.43e-13	5.00042e-11
	0.927	2.22e-12	1.05e-12	4.99948e-11	5.8e-13	-1.93e-12	5.00097e-11
	0.928	2.23e-12	3.67e-13	4.99982e-11	8.79e-13	-1.66e-12	5.00083e-11
	0.928	2.27e-12	-9.12e-14	5.00005e-11	1.19e-12	-1.18e-12	5.00059e-11
	0.928	2.34e-12	-6.25e-13	5.00031e-11	1.37e-12	1.07e-13	4.99995e-11
	0.928	2.28e-12	-9.69e-13	5.00048e-11	1.49e-12	1.19e-12	4.9994e-11
	0.928	2.32e-12	-1.46e-12	5.00073e-11	9.19e-13	1.46e-12	4.99927e-11
	0.928	2.34e-12	-1.69e-12	5.00085e-11	9.87e-13	1.67e-12	4.99917e-11
	0.928	2.27e-12	-1.62e-12	5.00081e-11	1.79e-12	1.19e-12	4.9994e-11
	0.928	2.25e-12	-1.43e-12	5.00071e-11	2.19e-12	-2.32e-13	5.00012e-11
	0.928	2.28e-12	-6.63e-13	5.00033e-11	2.03e-12	-1.59e-12	5.0008e-11
	0.928	2.29e-12	-1.29e-13	5.00006e-11	1.77e-12	-1.93e-12	5.00097e-11
	0.928	2.22e-12	4.05e-13	4.9998e-11	1.43e-12	-1.25e-12	5.00063e-11
	0.928	2.35e-12	1.13e-12	4.99944e-11	1.43e-12	-1.64e-13	5.00008e-11
	0.928	2.5e-12	1.36e-12	4.99932e-11	1.24e-12	7.85e-13	4.99961e-11
	0.928	2.42e-12	1.4e-12	4.9993e-11	7.02e-13	1.12e-12	4.99944e-11
	0.928	2.35e-12	1.28e-12	4.99936e-11	1.11e-12	1.6e-12	4.9992e-11
	0.928	2.35e-12	9.01e-13	4.99955e-11	8.11e-13	1.4e-12	4.9993e-11
	0.928	2.28e-12	5.19e-13	4.99974e-11	9.19e-13	2.43e-13	4.99988e-11
	0.928	2.35e-12	6.14e-14	4.99997e-11	1.24e-12	-1.11e-12	5.00056e-11
	0.928	2.43e-12	-4.34e-13	5.00022e-11	1.42e-12	-1.86e-12	5.00093e-11
	0.928	2.39e-12	-6.63e-13	5.00033e-11	1.77e-12	-1.93e-12	5.00097e-11
	0.929	2.25e-12	-1.24e-12	5.00062e-11	1.96e-12	-8.43e-13	5.00042e-11
	0.929	2.31e-12	-1.43e-12	5.00071e-11	2.19e-12	3.78e-13	4.99981e-11
	0.929	2.44e-12	-1.46e-12	5.00073e-11	2.63e-12	7.85e-13	4.99961e-11
	0.929	2.46e-12	-1.58e-12	5.00079e-11	2.78e-12	1.6e-12	4.9992e-11
	0.929	2.46e-12	-1.16e-12	5.00058e-11	1.98e-12	1.8e-12	4.9991e-11
	0.929	2.41e-12	-4.34e-13	5.00022e-11	2.09e-12	8.53e-13	4.99957e-11
	0.929	2.43e-12	2.52e-13	4.99987e-11	2.7e-12	-5.03e-13	5.00025e-11
	0.929	2.44e-12	8.63e-13	4.99957e-11	2.13e-12	-1.72e-12	5.00086e-11
	0.929	2.41e-12	1.36e-12	4.99932e-11	2.45e-12	-1.72e-12	5.00086e-11
	0.929	2.44e-12	1.59e-12	4.99921e-11	2.41e-12	-1.25e-12	5.00063e-11
	0.929	2.48e-12	1.66e-12	4.99917e-11	2.57e-12	-4.36e-13	5.00022e-11
	0.929	2.41e-12	1.43e-12	4.99929e-11	2.55e-12	1.12e-12	4.99944e-11
	0.929	2.35e-12	1.05e-12	4.99948e-11	2.66e-12	1.46e-12	4.99927e-11
	0.929	2.32e-12	4.43e-13	4.99978e-11	2.78e-12	1.73e-12	4.99914e-11
	0.929	2.41e-12	-2.82e-13	5.00014e-11	2.3e-12	1.4e-12	4.9993e-11
	0.929	2.48e-12	-5.87e-13	5.00029e-11	1.73e-12	-2.87e-14	5.00001e-11
	0.929	2.49e-12	-1.08e-12	5.00054e-11	1.98e-12	-1.11e-12	5.00056e-11
	0.929	2.42e-12	-1.46e-12	5.00073e-11	1.43e-12	-1.86e-12	5.00093e-11
	0.929	2.29e-12	-1.58e-12	5.00079e-11	1.79e-12	-1.59e-12	5.0008e-11
	0.929	2.39e-12	-1.73e-12	5.00086e-11	1.26e-12	-8.43e-13	5.00042e-11
	0.93	2.5e-12	-1.31e-12	5.00066e-11	1.33e-12	3.78e-13	4.99981e-11
	0.93	2.46e-12	-7.78e-13	5.00039e-11	1.81e-12	1.12e-12	4.99944e-11
	0.93	2.49e-12	-1.67e-13	5.00008e-11	1.1e-12	1.46e-12	4.99927e-11
	0.93	2.47e-12	5.57e-13	4.99972e-11	1.42e-12	1.6e-12	4.9992e-11
	0.93	2.48e-12	1.24e-12	4.99938e-11	2.03e-12	6.49e-13	4.99968e-11
	0.93	2.41e-12	1.51e-12	4.99924e-11	8.79e-13	-5.71e-13	5.00029e-11
	0.93	2.41e-12	1.55e-12	4.99922e-11	1.11e-12	-1.66e-12	5.00083e-11
	0.93	2.34e-12	1.4e-12	4.9993e-11	1.37e-12	-1.72e-12	5.00086e-11
	0.93	2.35e-12	1.4e-12	4.9993e-11	9.87e-13	-9.78e-13	5.00049e-11
	0.93	2.42e-12	9.01e-13	4.99955e-11	9.19e-13	-9.66e-14	5.00005e-11
	0.93	2.44e-12	1.38e-13	4.99993e-11	1.5e-12	5.14e-13	4.99974e-11
	0.93	2.37e-12	-9.12e-14	5.00005e-11	1.62e-12	1.33e-12	4.99934e-11
	0.93	2.44e-12	-3.96e-13	5.0002e-11	1.76e-12	1.4e-12	4.9993e-11
	0.93	2.47e-12	-1.08e-12	5.00054e-11	1.84e-12	8.53e-13	4.99957e-11
	0.93	2.48e-12	-1.62e-12	5.00081e-11	1.69e-12	-3e-13	5.00015e-11
	0.93	2.38e-12	-1.62e-12	5.00081e-11	1.72e-12	-1.11e-12	5.00056e-11
	0.93	2.35e-12	-1.81e-12	5.00091e-11	2.14e-12	-1.25e-12	5.00063e-11
	0.93	2.3e-12	-1.27e-12	5.00064e-11	2.45e-12	-1.25e-12	5.00063e-11
	0.93	2.39e-12	-7.02e-13	5.00035e-11	2.3e-12	-3e-13	5.00015e-11
	0.93	2.34e-12	1.38e-13	4.99993e-11	2.44e-12	7.85e-13	4.99961e-11
	0.931	2.36e-12	7.86e-13	4.99961e-11	2.76e-12	9.89e-13	4.99951e-11
	0.931	2.44e-12	1.47e-12	4.99927e-11	2.51e-12	1.67e-12	4.99917e-11
	0.931	2.49e-12	1.63e-12	4.99919e-11	3.17e-12	1.26e-12	4.99937e-11
	0.931	2.38e-12	1.59e-12	4.99921e-11	3.5e-12	3.78e-13	4.99981e-11
	0.931	2.34e-12	1.66e-12	4.99917e-11	2.99e-12	-7.75e-13	5.00039e-11
	0.931	2.35e-12	1.13e-12	4.99944e-11	2.95e-12	-1.66e-12	5.00083e-11
	0.931	2.33e-12	4.43e-13	4.99978e-11	2.97e-12	-1.45e-12	5.00072e-11
	0.931	2.29e-12	2.9e-13	4.99986e-11	3.05e-12	-7.07e-13	5.00035e-11
	0.931	2.28e-12	-2.06e-13	5.0001e-11	2.55e-12	1.75e-13	4.99991e-11
	0.931	2.38e-12	-8.16e-13	5.00041e-11	2.74e-12	1.06e-12	4.99947e-11
	0.931	2.43e-12	-1.35e-12	5.00068e-11	3.44e-12	1.4e-12	4.9993e-11
	0.931	2.44e-12	-1.5e-12	5.00075e-11	3.4e-12	9.89e-13	4.99951e-11
	0.931	2.49e-12	-1.88e-12	5.00094e-11	3.43e-12	7.17e-13	4.99964e-11
	0.931	2.35e-12	-1.58e-12	5.00079e-11	3.54e-12	-5.03e-13	5.00025e-11
	0.931	2.33e-12	-1.01e-12	5.00051e-11	3.77e-12	-1.32e-12	5.00066e-11
	0.931	2.36e-12	-4.34e-13	5.00022e-11	4.19e-12	-1.66e-12	5.00083e-11
	0.931	2.22e-12	2.52e-13	4.99987e-11	4.57e-12	-1.18e-12	5.00059e-11
	0.931	2.29e-12	9.01e-13	4.99955e-11	4.12e-12	-3e-13	5.00015e-11
	0.931	2.36e-12	1.21e-12	4.99939e-11	4.31e-12	2.43e-13	4.99988e-11
	0.931	2.42e-12	1.51e-12	4.99924e-11	4.32e-12	1.19e-12	4.9994e-11
	0.932	2.35e-12	1.55e-12	4.99922e-11	4.2e-12	1.46e-12	4.99927e-11
	0.932	2.42e-12	1.13e-12	4.99944e-11	3.54e-12	1.19e-12	4.9994e-11
	0.932	2.43e-12	8.63e-13	4.99957e-11	3.48e-12	1.07e-13	4.99995e-11
	0.932	2.4e-12	6.34e-13	4.99968e-11	3.58e-12	-7.75e-13	5.00039e-11
	0.932	2.28e-12	9.96e-14	4.99995e-11	3.47e-12	-1.52e-12	5.00076e-11
	0.932	2.22e-12	-1.67e-13	5.00008e-11	3.06e-12	-1.11e-12	5.00056e-11
	0.932	2.32e-12	-7.02e-13	5.00035e-11	3.5e-12	-6.39e-13	5.00032e-11
	0.932	2.41e-12	-1.16e-12	5.00058e-11	3.31e-12	-1.64e-13	5.00008e-11
	0.932	2.44e-12	-1.58e-12	5.00079e-11	2.95e-12	8.53e-13	4.99957e-11
	0.932	2.38e-12	-1.5e-12	5.00075e-11	3.56e-12	1.4e-12	4.9993e-11
	0.932	2.27e-12	-1.35e-12	5.00068e-11	3.33e-12	9.89e-13	4.99951e-11
	0.932	2.19e-12	-7.4e-13	5.00037e-11	2.57e-12	7.17e-13	4.99964e-11
	0.932	2.27e-12	2.33e-14	4.99999e-11	2.55e-12	-1.64e-13	5.00008e-11
	0.932	2.43e-12	6.72e-13	4.99966e-11	2.48e-12	-1.25e-12	5.00063e-11
	0.932	2.3e-12	1.09e-12	4.99946e-11	2.64e-12	-1.39e-12	5.0007e-11
	0.932	2.18e-12	1.55e-12	4.99922e-11	2.57e-12	-8.43e-13	5.00042e-11
	0.932	2.28e-12	1.63e-12	4.99919e-11	2.71e-12	-2.32e-13	5.00012e-11
	0.932	2.35e-12	1.4e-12	4.9993e-11	2.48e-12	7.17e-13	4.99964e-11
	0.932	2.37e-12	9.77e-13	4.99951e-11	2.19e-12	1.19e-12	4.9994e-11
	0.932	2.32e-12	7.1e-13	4.99965e-11	2.07e-12	1.46e-12	4.99927e-11
	0.933	2.33e-12	3.28e-13	4.99984e-11	1.8e-12	9.21e-13	4.99954e-11
	0.933	2.33e-12	-2.06e-13	5.0001e-11	1.77e-12	3.91e-14	4.99998e-11
	0.933	2.28e-12	-7.4e-13	5.00037e-11	2.09e-12	-7.75e-13	5.00039e-11
	0.933	2.38e-12	-1.04e-12	5.00052e-11	2e-12	-1.25e-12	5.00063e-11
	0.933	2.41e-12	-1.54e-12	5.00077e-11	2.1e-12	-1.25e-12	5.00063e-11
	0.933	2.35e-12	-1.58e-12	5.00079e-11	1.99e-12	-7.07e-13	5.00035e-11
	0.933	2.27e-12	-1.43e-12	5.00071e-11	2.71e-12	1.75e-13	4.99991e-11
	0.933	2.37e-12	-1.04e-12	5.00052e-11	2.68e-12	8.53e-13	4.99957e-11
	0.933	2.35e-12	-4.34e-13	5.00022e-11	2.66e-12	1.33e-12	4.99934e-11
	0.933	2.39e-12	1.76e-13	4.99991e-11	1.88e-12	1.19e-12	4.9994e-11
	0.933	2.3e-12	7.48e-13	4.99963e-11	2.05e-12	6.49e-13	4.99968e-11
	0.933	2.23e-12	1.32e-12	4.99934e-11	1.99e-12	-3e-13	5.00015e-11
	0.933	2.27e-12	1.51e-12	4.99924e-11	1.75e-12	-1.18e-12	5.00059e-11
	0.933	2.3e-12	1.4e-12	4.9993e-11	2.02e-12	-1.05e-12	5.00053e-11
	0.933	2.38e-12	1.28e-12	4.99936e-11	1.73e-12	-7.75e-13	5.00039e-11
	0.933	2.38e-12	1.21e-12	4.99939e-11	1.61e-12	3.91e-14	4.99998e-11
	0.933	2.41e-12	6.34e-13	4.99968e-11	1.68e-12	5.14e-13	4.99974e-11
	0.933	2.5e-12	1.76e-13	4.99991e-11	1.24e-12	1.06e-12	4.99947e-11
	0.933	2.45e-12	-3.58e-13	5.00018e-11	1.67e-12	1.26e-12	4.99937e-11
	0.933	2.26e-12	-9.3e-13	5.00047e-11	1.62e-12	8.53e-13	4.99957e-11
	0.934	2.3e-12	-1.27e-12	5.00064e-11	1.68e-12	1.75e-13	4.99991e-11
	0.934	2.35e-12	-1.43e-12	5.00071e-11	1.94e-12	-9.1e-13	5.00046e-11
	0.934	2.23e-12	-1.73e-12	5.00086e-11	2.22e-12	-1.39e-12	5.0007e-11
	0.934	2.15e-12	-1.54e-12	5.00077e-11	2.47e-12	-8.43e-13	5.00042e-11
	0.934	2.22e-12	-7.78e-13	5.00039e-11	2.83e-12	-5.03e-13	5.00025e-11
	0.934	2.4e-12	-2.06e-13	5.0001e-11	2.83e-12	3.78e-13	4.99981e-11
	0.934	2.44e-12	5.19e-13	4.99974e-11	2.79e-12	7.85e-13	4.99961e-11
	0.934	2.32e-12	1.02e-12	4.99949e-11	3.08e-12	1.26e-12	4.99937e-11
	0.934	2.27e-12	1.32e-12	4.99934e-11	2.78e-12	9.21e-13	4.99954e-11
	0.934	2.22e-12	1.59e-12	4.99921e-11	2.66e-12	3.78e-13	4.99981e-11
	0.934	2.23e-12	1.59e-12	4.99921e-11	2.75e-12	-6.39e-13	5.00032e-11
	0.934	2.34e-12	1.24e-12	4.99938e-11	2.57e-12	-9.1e-13	5.00046e-11
	0.934	2.38e-12	7.48e-13	4.99963e-11	3.52e-12	-1.05e-12	5.00053e-11
	0.934	2.33e-12	2.52e-13	4.99987e-11	3.61e-12	-9.1e-13	5.00046e-11
	0.934	2.31e-12	-9.12e-14	5.00005e-11	3.69e-12	-1.64e-13	5.00008e-11
	0.934	2.27e-12	-4.34e-13	5.00022e-11	3.9e-12	6.49e-13	4.99968e-11
	0.934	2.28e-12	-1.08e-12	5.00054e-11	3.82e-12	1.12e-12	4.99944e-11
	0.934	2.35e-12	-1.35e-12	5.00068e-11	3.4e-12	1.12e-12	4.99944e-11
	0.934	2.39e-12	-1.81e-12	5.00091e-11	3.77e-12	5.82e-13	4.99971e-11
	0.934	2.35e-12	-1.73e-12	5.00086e-11	3.5e-12	-3e-13	5.00015e-11
	0.935	2.27e-12	-1.5e-12	5.00075e-11	3.32e-12	-1.18e-12	5.00059e-11
	0.935	2.18e-12	-7.78e-13	5.00039e-11	2.98e-12	-1.25e-12	5.00063e-11
	0.935	2.16e-12	-9.12e-14	5.00005e-11	3.61e-12	-1.05e-12	5.00053e-11
	0.935	2.24e-12	4.81e-13	4.99976e-11	3.97e-12	-4.36e-13	5.00022e-11
	0.935	2.41e-12	1.02e-12	4.99949e-11	3.56e-12	6.49e-13	4.99968e-11
	0.935	2.48e-12	1.24e-12	4.99938e-11	3.48e-12	1.06e-12	4.99947e-11
	0.935	2.38e-12	1.24e-12	4.99938e-11	2.95e-12	1.19e-12	4.9994e-11
	0.935	2.27e-12	1.32e-12	4.99934e-11	3.77e-12	6.49e-13	4.99968e-11
	0.935	2.25e-12	1.13e-12	4.99944e-11	3.71e-12	-2.87e-14	5.00001e-11
	0.935	2.32e-12	8.24e-13	4.99959e-11	3.28e-12	-4.36e-13	5.00022e-11
	0.935	2.37e-12	3.67e-13	4.99982e-11	3.31e-12	-1.25e-12	5.00063e-11
	0.935	2.33e-12	-9.12e-14	5.00005e-11	3.55e-12	-1.05e-12	5.00053e-11
	0.935	2.14e-12	-6.25e-13	5.00031e-11	3.78e-12	-6.39e-13	5.00032e-11
	0.935	2.23e-12	-1.01e-12	5.00051e-11	3.66e-12	-9.66e-14	5.00005e-11
	0.935	2.32e-12	-1.46e-12	5.00073e-11	3.48e-12	4.46e-13	4.99978e-11
	0.935	2.32e-12	-1.58e-12	5.00079e-11	3.46e-12	1.06e-12	4.99947e-11
	0.935	2.38e-12	-1.43e-12	5.00071e-11	3.74e-12	7.17e-13	4.99964e-11
	0.935	2.32e-12	-1.04e-12	5.00052e-11	3.78e-12	3.1e-13	4.99984e-11
	0.935	2.23e-12	-5.49e-13	5.00027e-11	3.69e-12	3.91e-14	4.99998e-11
	0.935	2.22e-12	2.52e-13	4.99987e-11	3.54e-12	-7.75e-13	5.00039e-11
	0.936	2.25e-12	8.24e-13	4.99959e-11	3.7e-12	-9.78e-13	5.00049e-11
	0.936	2.25e-12	1.24e-12	4.99938e-11	4.13e-12	-6.39e-13	5.00032e-11
	0.936	2.24e-12	1.17e-12	4.99942e-11	4.36e-12	-2.87e-14	5.00001e-11
	0.936	2.25e-12	1.28e-12	4.99936e-11	3.82e-12	2.43e-13	4.99988e-11
	0.936	2.27e-12	1.05e-12	4.99948e-11	3.25e-12	1.06e-12	4.99947e-11
	0.936	2.24e-12	7.86e-13	4.99961e-11	3.61e-12	9.21e-13	4.99954e-11
	0.936	2.23e-12	5.57e-13	4.99972e-11	2.98e-12	5.82e-13	4.99971e-11
	0.936	2.22e-12	2.52e-13	4.99987e-11	3.16e-12	-9.66e-14	5.00005e-11
	0.936	2.28e-12	-1.29e-13	5.00006e-11	3.69e-12	-8.43e-13	5.00042e-11
	0.936	2.27e-12	-8.54e-13	5.00043e-11	3.71e-12	-8.43e-13	5.00042e-11
	0.936	2.25e-12	-1.27e-12	5.00064e-11	4.58e-12	-1.05e-12	5.00053e-11
	0.936	2.28e-12	-1.62e-12	5.00081e-11	3.89e-12	-9.66e-14	5.00005e-11
	0.936	2.21e-12	-1.54e-12	5.00077e-11	3.14e-12	2.43e-13	4.99988e-11
	0.936	2.21e-12	-1.39e-12	5.0007e-11	3.47e-12	7.85e-13	4.99961e-11
	0.936	2.28e-12	-9.3e-13	5.00047e-11	2.91e-12	7.85e-13	4.99961e-11
	0.936	2.28e-12	-1.67e-13	5.00008e-11	2.79e-12	5.82e-13	4.99971e-11
	0.936	2.09e-12	2.9e-13	4.99986e-11	2.94e-12	1.75e-13	4.99991e-11
	0.936	2.22e-12	1.13e-12	4.99944e-11	3.12e-12	-1.64e-13	5.00008e-11
	0.936	2.32e-12	1.28e-12	4.99936e-11	3.16e-12	-4.36e-13	5.00022e-11
	0.936	2.3e-12	1.28e-12	4.99936e-11	2.41e-12	-8.43e-13	5.00042e-11
	0.937	2.29e-12	1.28e-12	4.99936e-11	1.88e-12	-6.39e-13	5.00032e-11
	0.937	2.24e-12	1.09e-12	4.99946e-11	1.53e-12	-9.66e-14	5.00005e-11
	0.937	2.28e-12	6.72e-13	4.99966e-11	1.31e-12	3.78e-13	4.99981e-11
	0.937	2.2e-12	3.28e-13	4.99984e-11	1.11e-12	6.49e-13	4.99968e-11
	0.937	2.22e-12	-1.49e-14	5.00001e-11	1.43e-12	9.21e-13	4.99954e-11
	0.937	2.13e-12	-5.87e-13	5.00029e-11	1.24e-12	3.78e-13	4.99981e-11
	0.937	2.09e-12	-8.54e-13	5.00043e-11	5.8e-13	-9.66e-14	5.00005e-11
	0.937	2.14e-12	-1.31e-12	5.00066e-11	-9.78e-14	-5.03e-13	5.00025e-11
	0.937	2.2e-12	-1.5e-12	5.00075e-11	7.7e-13	-5.71e-13	5.00029e-11
	0.937	2.25e-12	-1.5e-12	5.00075e-11	4.31e-13	-8.43e-13	5.00042e-11
	0.937	2.28e-12	-1.01e-12	5.00051e-11	4.04e-13	-5.71e-13	5.00029e-11
	0.937	2.32e-12	-3.2e-13	5.00016e-11	3.5e-13	1.75e-13	4.99991e-11
	0.937	2.25e-12	1.38e-13	4.99993e-11	4.31e-13	3.1e-13	4.99984e-11
	0.937	2.27e-12	8.24e-13	4.99959e-11	7.3e-13	7.17e-13	4.99964e-11
	0.937	2.28e-12	8.24e-13	4.99959e-11	7.7e-13	2.43e-13	4.99988e-11
	0.937	2.19e-12	1.05e-12	4.99948e-11	4.85e-13	3.91e-14	4.99998e-11
	0.937	2.15e-12	1.21e-12	4.99939e-11	9.21e-14	-9.66e-14	5.00005e-11
	0.937	2.12e-12	1.13e-12	4.99944e-11	3.5e-13	-3.68e-13	5.00018e-11
	0.937	2.24e-12	7.86e-13	4.99961e-11	6.48e-13	-3.68e-13	5.00018e-11
	0.937	2.27e-12	6.72e-13	4.99966e-11	2.43e-14	-7.07e-13	5.00035e-11
	0.938	2.25e-12	2.9e-13	4.99986e-11	-3.69e-13	-2.32e-13	5.00012e-11
	0.938	2.22e-12	-2.44e-13	5.00012e-11	-2.2e-13	4.46e-13	4.99978e-11
	0.938	2.22e-12	-6.63e-13	5.00033e-11	-6.27e-13	6.49e-13	4.99968e-11
	0.938	2.3e-12	-1.08e-12	5.00054e-11	-1.17e-12	4.46e-13	4.99978e-11
	0.938	2.32e-12	-1.58e-12	5.00079e-11	-1.26e-12	3.91e-14	4.99998e-11
	0.938	2.38e-12	-1.66e-12	5.00083e-11	-1.3e-12	1.07e-13	4.99995e-11
	0.938	2.32e-12	-1.62e-12	5.00081e-11	-8.84e-13	-4.36e-13	5.00022e-11
	0.938	2.26e-12	-1.01e-12	5.00051e-11	-9.52e-13	-5.03e-13	5.00025e-11
	0.938	2.19e-12	-2.82e-13	5.00014e-11	-1.05e-12	-5.03e-13	5.00025e-11
	0.938	2.19e-12	2.9e-13	4.99986e-11	-7.76e-13	-4.36e-13	5.00022e-11
	0.938	2.22e-12	7.86e-13	4.99961e-11	1.87e-13	-2.87e-14	5.00001e-11
	0.938	2.21e-12	1.17e-12	4.99942e-11	7.84e-13	4.46e-13	4.99978e-11
	0.938	2.22e-12	1.13e-12	4.99944e-11	7.43e-13	5.14e-13	4.99974e-11
	0.938	2.35e-12	1.32e-12	4.99934e-11	6.75e-13	5.82e-13	4.99971e-11
	0.938	2.34e-12	1.21e-12	4.99939e-11	4.58e-13	3.78e-13	4.99981e-11
	0.938	2.43e-12	1.09e-12	4.99946e-11	5.13e-13	-1.64e-13	5.00008e-11
	0.938	2.34e-12	6.72e-13	4.99966e-11	4.72e-13	-4.36e-13	5.00022e-11
	0.938	2.32e-12	2.14e-13	4.99989e-11	8.79e-13	-5.03e-13	5.00025e-11
	0.938	2.24e-12	-2.06e-13	5.0001e-11	5.53e-13	-7.75e-13	5.00039e-11
	0.938	2.24e-12	-7.4e-13	5.00037e-11	3.5e-13	-3e-13	5.00015e-11
	0.939	2.27e-12	-1.2e-12	5.0006e-11	6.5e-14	1.75e-13	4.99991e-11
	0.939	2.24e-12	-1.27e-12	5.00064e-11	9.21e-14	8.53e-13	4.99957e-11
	0.939	2.17e-12	-1.16e-12	5.00058e-11	1.06e-13	5.82e-13	4.99971e-11
	0.939	2.19e-12	-9.69e-13	5.00048e-11	-1.38e-13	4.46e-13	4.99978e-11
	0.939	2.32e-12	-5.11e-13	5.00026e-11	1.46e-13	-9.66e-14	5.00005e-11
	0.939	2.29e-12	-2.06e-13	5.0001e-11	-1.03e-12	-9.66e-14	5.00005e-11
	0.939	2.34e-12	2.9e-13	4.99986e-11	-1.87e-12	-2.32e-13	5.00012e-11
	0.939	2.19e-12	3.67e-13	4.99982e-11	-2.31e-12	-7.07e-13	5.00035e-11
	0.939	2.22e-12	1.05e-12	4.99948e-11	-2.82e-12	-3e-13	5.00015e-11
	0.939	2.22e-12	9.01e-13	4.99955e-11	-3.04e-12	1.75e-13	4.99991e-11
	0.939	2.19e-12	9.77e-13	4.99951e-11	-3.31e-12	3.1e-13	4.99984e-11
	0.939	2.19e-12	1.02e-12	4.99949e-11	-3.15e-12	4.46e-13	4.99978e-11
	0.939	2.17e-12	7.48e-13	4.99963e-11	-3.07e-12	1.75e-13	4.99991e-11
	0.939	2.25e-12	6.34e-13	4.99968e-11	-3.23e-12	3.1e-13	4.99984e-11
	0.939	2.23e-12	6.14e-14	4.99997e-11	-3.8e-12	1.75e-13	4.99991e-11
	0.939	2.28e-12	-4.73e-13	5.00024e-11	-3.57e-12	-1.64e-13	5.00008e-11
	0.939	2.38e-12	-8.16e-13	5.00041e-11	-2.84e-12	-2.32e-13	5.00012e-11
	0.939	2.22e-12	-1.46e-12	5.00073e-11	-2.3e-12	-5.03e-13	5.00025e-11
	0.939	2.22e-12	-1.58e-12	5.00079e-11	-2.16e-12	-3e-13	5.00015e-11
	0.939	2.04e-12	-1.35e-12	5.00068e-11	-2.34e-12	3.1e-13	4.99984e-11
	0.94	2.19e-12	-9.69e-13	5.00048e-11	-1.94e-12	6.49e-13	4.99968e-11
	0.94	2.28e-12	-2.44e-13	5.00012e-11	-1.49e-12	1.75e-13	4.99991e-11
	0.94	2.26e-12	1.76e-13	4.99991e-11	-1.82e-12	1.75e-13	4.99991e-11
	0.94	2.25e-12	6.72e-13	4.99966e-11	-1.52e-12	-2.87e-14	5.00001e-11
	0.94	2.21e-12	9.39e-13	4.99953e-11	-1.13e-12	1.07e-13	4.99995e-11
	0.94	2.16e-12	1.17e-12	4.99942e-11	-1.26e-12	-3e-13	5.00015e-11
	0.94	2.24e-12	1.21e-12	4.99939e-11	-1.06e-12	-4.36e-13	5.00022e-11
	0.94	2.21e-12	1.05e-12	4.99948e-11	-6.13e-13	-2.32e-13	5.00012e-11
	0.94	2.32e-12	7.1e-13	4.99965e-11	-6.13e-13	3.1e-13	4.99984e-11
	0.94	2.35e-12	5.19e-13	4.99974e-11	-9.12e-13	5.14e-13	4.99974e-11
	0.94	2.28e-12	-5.3e-14	5.00003e-11	-8.44e-13	3.91e-14	4.99998e-11
	0.94	2.15e-12	-5.3e-14	5.00003e-11	-1.17e-12	1.07e-13	4.99995e-11
	0.94	2.26e-12	-3.58e-13	5.00018e-11	-9.12e-13	3.1e-13	4.99984e-11
	0.94	2.36e-12	-9.3e-13	5.00047e-11	-4.35e-14	1.75e-13	4.99991e-11
	0.94	2.44e-12	-1.31e-12	5.00066e-11	7.57e-13	3.91e-14	4.99998e-11
	0.94	2.3e-12	-1.5e-12	5.00075e-11	1.18e-12	-3e-13	5.00015e-11
	0.94	2.1e-12	-9.3e-13	5.00047e-11	1.73e-13	-5.03e-13	5.00025e-11
	0.94	2.15e-12	-4.73e-13	5.00024e-11	5.13e-13	-3e-13	5.00015e-11
	0.94	2.29e-12	-1.49e-14	5.00001e-11	9.06e-13	-9.66e-14	5.00005e-11
	0.94	2.41e-12	4.43e-13	4.99978e-11	4.99e-13	1.75e-13	4.99991e-11
	0.941	2.32e-12	5.95e-13	4.9997e-11	-1.52e-13	1.75e-13	4.99991e-11
	0.941	2.32e-12	1.13e-12	4.99944e-11	-2.74e-13	2.43e-13	4.99988e-11
	0.941	2.35e-12	9.77e-13	4.99951e-11	-5.71e-14	3.1e-13	4.99984e-11
	0.941	2.4e-12	9.01e-13	4.99955e-11	6.89e-13	5.14e-13	4.99974e-11
	0.941	2.35e-12	8.24e-13	4.99959e-11	7.02e-13	-9.66e-14	5.00005e-11
	0.941	2.35e-12	4.81e-13	4.99976e-11	3.79e-14	-4.36e-13	5.00022e-11
	0.941	2.24e-12	3.67e-13	4.99982e-11	-7.07e-14	-5.03e-13	5.00025e-11
	0.941	2.2e-12	-1.49e-14	5.00001e-11	1.46e-13	3.91e-14	4.99998e-11
	0.941	2.28e-12	-3.2e-13	5.00016e-11	3.23e-13	-9.66e-14	5.00005e-11
	0.941	2.36e-12	-1.08e-12	5.00054e-11	-2.2e-13	-1.64e-13	5.00008e-11
	0.941	2.36e-12	-1.43e-12	5.00071e-11	-8.71e-13	-1.64e-13	5.00008e-11
	0.941	2.36e-12	-1.46e-12	5.00073e-11	-9.39e-13	3.1e-13	4.99984e-11
	0.941	2.37e-12	-1.31e-12	5.00066e-11	-1.45e-12	5.82e-13	4.99971e-11
	0.941	2.36e-12	-8.54e-13	5.00043e-11	-1.12e-12	3.78e-13	4.99981e-11
	0.941	2.33e-12	-3.58e-13	5.00018e-11	-1.22e-12	-2.87e-14	5.00001e-11
	0.941	2.38e-12	2.14e-13	4.99989e-11	-1.64e-12	-5.03e-13	5.00025e-11
	0.941	2.28e-12	5.57e-13	4.99972e-11	-1.36e-12	-1.64e-13	5.00008e-11
	0.941	2.2e-12	8.24e-13	4.99959e-11	-1.26e-12	-9.66e-14	5.00005e-11
	0.941	2.2e-12	1.09e-12	4.99946e-11	-1.67e-12	-2.87e-14	5.00001e-11
	0.941	2.22e-12	1.02e-12	4.99949e-11	-1.63e-12	3.91e-14	4.99998e-11
	0.942	2.25e-12	1.02e-12	4.99949e-11	-2.43e-12	1.75e-13	4.99991e-11
	0.942	2.34e-12	9.01e-13	4.99955e-11	-2.21e-12	2.43e-13	4.99988e-11
	0.942	2.37e-12	6.72e-13	4.99966e-11	-2.23e-12	3.78e-13	4.99981e-11
	0.942	2.27e-12	1.38e-13	4.99993e-11	-2.38e-12	3.91e-14	4.99998e-11
	0.942	2.17e-12	-5.3e-14	5.00003e-11	-1.83e-12	-2.87e-14	5.00001e-11
	0.942	2.18e-12	-5.11e-13	5.00026e-11	-1.44e-12	-3e-13	5.00015e-11
	0.942	2.25e-12	-9.3e-13	5.00047e-11	-1.45e-12	-2.32e-13	5.00012e-11
	0.942	2.22e-12	-1.12e-12	5.00056e-11	-1.49e-12	-2.87e-14	5.00001e-11
	0.942	2.14e-12	-1.31e-12	5.00066e-11	-1.24e-12	-9.66e-14	5.00005e-11
	0.942	2.09e-12	-1.04e-12	5.00052e-11	-1.05e-12	-2.87e-14	5.00001e-11
	0.942	2.2e-12	-7.02e-13	5.00035e-11	-1.3e-12	4.46e-13	4.99978e-11
	0.942	2.22e-12	-3.96e-13	5.0002e-11	-1.48e-12	5.82e-13	4.99971e-11
	0.942	2.25e-12	9.96e-14	4.99995e-11	-1.35e-12	5.82e-13	4.99971e-11
	0.942	2.27e-12	4.05e-13	4.9998e-11	-1.09e-12	-9.66e-14	5.00005e-11
	0.942	2.22e-12	5.57e-13	4.99972e-11	-1.54e-12	-5.71e-13	5.00029e-11
	0.942	2.1e-12	9.39e-13	4.99953e-11	-1.48e-12	-5.71e-13	5.00029e-11
	0.942	2.25e-12	1.21e-12	4.99939e-11	-1.4e-12	-1.64e-13	5.00008e-11
	0.942	2.3e-12	8.24e-13	4.99959e-11	-1.82e-12	-1.64e-13	5.00008e-11
	0.942	2.24e-12	6.34e-13	4.99968e-11	-1.97e-12	3.91e-14	4.99998e-11
	0.942	2.16e-12	5.95e-13	4.9997e-11	-1.54e-12	1.75e-13	4.99991e-11
	0.943	2.12e-12	2.9e-13	4.99986e-11	-1.94e-12	9.21e-13	4.99954e-11
	0.943	2.09e-12	-2.06e-13	5.0001e-11	-1.86e-12	7.17e-13	4.99964e-11
	0.943	2.12e-12	-4.34e-13	5.00022e-11	-1.52e-12	3.91e-14	4.99998e-11
	0.943	2.21e-12	-1.04e-12	5.00052e-11	-1.71e-12	-9.66e-14	5.00005e-11
	0.943	2.22e-12	-1.24e-12	5.00062e-11	-2.08e-12	-3.68e-13	5.00018e-11
	0.943	2.09e-12	-1.24e-12	5.00062e-11	-1.59e-12	-2.32e-13	5.00012e-11
	0.943	2.15e-12	-7.4e-13	5.00037e-11	-1.56e-12	-3e-13	5.00015e-11
	0.943	2.14e-12	-5.49e-13	5.00027e-11	-2.21e-12	-4.36e-13	5.00022e-11
	0.943	2.08e-12	1.76e-13	4.99991e-11	-2.92e-12	-9.66e-14	5.00005e-11
	0.943	2.15e-12	4.05e-13	4.9998e-11	-2.48e-12	4.46e-13	4.99978e-11
	0.943	2.26e-12	5.57e-13	4.99972e-11	-2.28e-12	7.17e-13	4.99964e-11
	0.943	2.22e-12	5.95e-13	4.9997e-11	-2.88e-12	7.17e-13	4.99964e-11
	0.943	2.15e-12	7.86e-13	4.99961e-11	-2.51e-12	3.91e-14	4.99998e-11
	0.943	2.16e-12	7.86e-13	4.99961e-11	-2.7e-12	-3.68e-13	5.00018e-11
	0.943	2.08e-12	8.24e-13	4.99959e-11	-2.95e-12	-3.68e-13	5.00018e-11
	0.943	2.09e-12	8.63e-13	4.99957e-11	-2.74e-12	-4.36e-13	5.00022e-11
	0.943	2.07e-12	2.9e-13	4.99986e-11	-2.63e-12	-5.71e-13	5.00029e-11
	0.943	2.12e-12	6.14e-14	4.99997e-11	-2.5e-12	-3e-13	5.00015e-11
	0.943	2.12e-12	-1.67e-13	5.00008e-11	-2.78e-12	1.07e-13	4.99995e-11
	0.943	2.3e-12	-6.25e-13	5.00031e-11	-2.61e-12	4.46e-13	4.99978e-11
	0.944	2.28e-12	-9.69e-13	5.00048e-11	-2.67e-12	9.21e-13	4.99954e-11
	0.944	2.09e-12	-1.01e-12	5.00051e-11	-2.72e-12	5.14e-13	4.99974e-11
	0.944	2.13e-12	-7.78e-13	5.00039e-11	-3.18e-12	-3.68e-13	5.00018e-11
	0.944	2.21e-12	-7.78e-13	5.00039e-11	-4.03e-12	-3e-13	5.00015e-11
	0.944	2.18e-12	-2.44e-13	5.00012e-11	-3.84e-12	-3e-13	5.00015e-11
	0.944	2.19e-12	9.96e-14	4.99995e-11	-3.57e-12	-3e-13	5.00015e-11
	0.944	2.18e-12	4.05e-13	4.9998e-11	-3e-12	-4.36e-13	5.00022e-11
	0.944	2.32e-12	5.57e-13	4.99972e-11	-3.35e-12	-9.66e-14	5.00005e-11
	0.944	2.25e-12	7.1e-13	4.99965e-11	-3.64e-12	7.85e-13	4.99961e-11
	0.944	2.28e-12	7.86e-13	4.99961e-11	-3.11e-12	7.85e-13	4.99961e-11
	0.944	2.17e-12	7.1e-13	4.99965e-11	-3.22e-12	4.46e-13	4.99978e-11
	0.944	2.14e-12	7.86e-13	4.99961e-11	-3.24e-12	-9.66e-14	5.00005e-11
	0.944	2.19e-12	4.05e-13	4.9998e-11	-2.92e-12	-3e-13	5.00015e-11
	0.944	2.37e-12	-1.49e-14	5.00001e-11	-3.65e-12	-5.71e-13	5.00029e-11
	0.944	2.34e-12	-3.96e-13	5.0002e-11	-4.07e-12	-5.71e-13	5.00029e-11
	0.944	2.25e-12	-7.4e-13	5.00037e-11	-3.81e-12	-6.39e-13	5.00032e-11
	0.944	2.32e-12	-8.54e-13	5.00043e-11	-3.39e-12	-4.36e-13	5.00022e-11
	0.944	2.3e-12	-1.12e-12	5.00056e-11	-2.97e-12	3.78e-13	4.99981e-11
	0.944	2.29e-12	-8.92e-13	5.00045e-11	-2.54e-12	9.21e-13	4.99954e-11
	0.944	2.35e-12	-6.63e-13	5.00033e-11	-2.73e-12	8.53e-13	4.99957e-11
	0.945	2.34e-12	-4.73e-13	5.00024e-11	-2.63e-12	2.43e-13	4.99988e-11
	0.945	2.25e-12	1.38e-13	4.99993e-11	-2.73e-12	-1.64e-13	5.00008e-11
	0.945	2.22e-12	4.05e-13	4.9998e-11	-3.3e-12	-5.03e-13	5.00025e-11
	0.945	2.39e-12	7.1e-13	4.99965e-11	-3.65e-12	-7.07e-13	5.00035e-11
	0.945	2.43e-12	6.72e-13	4.99966e-11	-4.09e-12	-7.75e-13	5.00039e-11
	0.945	2.37e-12	8.63e-13	4.99957e-11	-4.41e-12	-5.71e-13	5.00029e-11
	0.945	2.38e-12	9.01e-13	4.99955e-11	-4.33e-12	-9.66e-14	5.00005e-11
	0.945	2.31e-12	7.86e-13	4.99961e-11	-3.88e-12	7.17e-13	4.99964e-11
	0.945	2.32e-12	6.72e-13	4.99966e-11	-4.26e-12	1.06e-12	4.99947e-11
	0.945	2.3e-12	2.9e-13	4.99986e-11	-4.6e-12	8.53e-13	4.99957e-11
	0.945	2.38e-12	-1.49e-14	5.00001e-11	-3.94e-12	3.91e-14	4.99998e-11
	0.945	2.28e-12	-1.67e-13	5.00008e-11	-3.83e-12	-2.32e-13	5.00012e-11
	0.945	2.22e-12	-5.11e-13	5.00026e-11	-3.98e-12	-3e-13	5.00015e-11
	0.945	2.23e-12	-7.4e-13	5.00037e-11	-3.83e-12	-7.75e-13	5.00039e-11
	0.945	2.34e-12	-1.04e-12	5.00052e-11	-3.66e-12	-7.07e-13	5.00035e-11
	0.945	2.35e-12	-8.54e-13	5.00043e-11	-3.14e-12	-5.71e-13	5.00029e-11
	0.945	2.35e-12	-7.4e-13	5.00037e-11	-3.15e-12	3.78e-13	4.99981e-11
	0.945	2.33e-12	-3.96e-13	5.0002e-11	-3.37e-12	1.06e-12	4.99947e-11
	0.945	2.42e-12	2.33e-14	4.99999e-11	-3.08e-12	8.53e-13	4.99957e-11
	0.945	2.41e-12	1.38e-13	4.99993e-11	-3.45e-12	4.46e-13	4.99978e-11
	0.946	2.39e-12	4.43e-13	4.99978e-11	-2.96e-12	-3.68e-13	5.00018e-11
	0.946	2.39e-12	5.19e-13	4.99974e-11	-3.68e-12	-5.03e-13	5.00025e-11
	0.946	2.34e-12	7.48e-13	4.99963e-11	-3.61e-12	-5.03e-13	5.00025e-11
	0.946	2.19e-12	7.86e-13	4.99961e-11	-3.18e-12	-9.78e-13	5.00049e-11
	0.946	2.2e-12	9.01e-13	4.99955e-11	-3.2e-12	-5.71e-13	5.00029e-11
	0.946	2.24e-12	5.57e-13	4.99972e-11	-3.08e-12	3.78e-13	4.99981e-11
	0.946	2.36e-12	4.05e-13	4.9998e-11	-2.54e-12	9.21e-13	4.99954e-11
	0.946	2.38e-12	-9.12e-14	5.00005e-11	-2.77e-12	1.26e-12	4.99937e-11
	0.946	2.34e-12	-4.34e-13	5.00022e-11	-2.96e-12	7.17e-13	4.99964e-11
	0.946	2.41e-12	-7.4e-13	5.00037e-11	-3.29e-12	-2.87e-14	5.00001e-11
	0.946	2.35e-12	-8.16e-13	5.00041e-11	-3.54e-12	-7.07e-13	5.00035e-11
	0.946	2.39e-12	-9.69e-13	5.00048e-11	-3.62e-12	-1.05e-12	5.00053e-11
	0.946	2.38e-12	-8.54e-13	5.00043e-11	-3.65e-12	-7.75e-13	5.00039e-11
	0.946	2.29e-12	-5.49e-13	5.00027e-11	-3.85e-12	-9.78e-13	5.00049e-11
	0.946	2.31e-12	-3.96e-13	5.0002e-11	-4e-12	-1.64e-13	5.00008e-11
	0.946	2.22e-12	-1.67e-13	5.00008e-11	-4.67e-12	9.21e-13	4.99954e-11
	0.946	2.21e-12	1.38e-13	4.99993e-11	-4.17e-12	1.33e-12	4.99934e-11
	0.946	2.25e-12	4.81e-13	4.99976e-11	-4.42e-12	1.12e-12	4.99944e-11
	0.946	2.34e-12	5.95e-13	4.9997e-11	-4.47e-12	2.43e-13	4.99988e-11
	0.946	2.35e-12	6.34e-13	4.99968e-11	-4.36e-12	-3.68e-13	5.00018e-11
	0.947	2.28e-12	6.34e-13	4.99968e-11	-4.84e-12	-9.1e-13	5.00046e-11
	0.947	2.32e-12	4.43e-13	4.99978e-11	-5.01e-12	-8.43e-13	5.00042e-11
	0.947	2.2e-12	5.57e-13	4.99972e-11	-5.22e-12	-1.05e-12	5.00053e-11
	0.947	2.24e-12	3.28e-13	4.99984e-11	-5.81e-12	-7.07e-13	5.00035e-11
	0.947	2.25e-12	9.96e-14	4.99995e-11	-5.92e-12	2.43e-13	4.99988e-11
	0.947	2.31e-12	-3.2e-13	5.00016e-11	-5.93e-12	9.89e-13	4.99951e-11
	0.947	2.17e-12	-6.25e-13	5.00031e-11	-5.81e-12	1.33e-12	4.99934e-11
	0.947	2.14e-12	-8.92e-13	5.00045e-11	-4.83e-12	8.53e-13	4.99957e-11
	0.947	2.31e-12	-8.54e-13	5.00043e-11	-4.82e-12	-9.66e-14	5.00005e-11
	0.947	2.26e-12	-7.78e-13	5.00039e-11	-5.54e-12	-5.71e-13	5.00029e-11
	0.947	2.17e-12	-6.63e-13	5.00033e-11	-5.63e-12	-9.78e-13	5.00049e-11
	0.947	2.25e-12	-1.29e-13	5.00006e-11	-5.85e-12	-1.11e-12	5.00056e-11
	0.947	2.3e-12	-1.29e-13	5.00006e-11	-5.25e-12	-9.78e-13	5.00049e-11
	0.947	2.22e-12	2.52e-13	4.99987e-11	-5.84e-12	-3.68e-13	5.00018e-11
	0.947	2.2e-12	4.05e-13	4.9998e-11	-5.81e-12	7.17e-13	4.99964e-11
	0.947	2.28e-12	4.81e-13	4.99976e-11	-6.38e-12	1.26e-12	4.99937e-11
	0.947	2.17e-12	5.19e-13	4.99974e-11	-7.19e-12	1.12e-12	4.99944e-11
	0.947	2.15e-12	4.43e-13	4.99978e-11	-6.61e-12	1.75e-13	4.99991e-11
	0.947	2.17e-12	5.57e-13	4.99972e-11	-6.31e-12	-3.68e-13	5.00018e-11
	0.947	2.18e-12	2.52e-13	4.99987e-11	-6.61e-12	-9.78e-13	5.00049e-11
	0.948	2.33e-12	9.96e-14	4.99995e-11	-6.93e-12	-9.78e-13	5.00049e-11
	0.948	2.33e-12	-2.06e-13	5.0001e-11	-7.1e-12	-1.11e-12	5.00056e-11
	0.948	2.22e-12	-2.82e-13	5.00014e-11	-6.83e-12	-5.71e-13	5.00029e-11
	0.948	2.09e-12	-4.73e-13	5.00024e-11	-7.27e-12	3.1e-13	4.99984e-11
	0.948	2.15e-12	-5.49e-13	5.00027e-11	-7.38e-12	1.33e-12	4.99934e-11
	0.948	2.27e-12	-6.25e-13	5.00031e-11	-7.29e-12	1.4e-12	4.9993e-11
	0.948	2.24e-12	-6.63e-13	5.00033e-11	-7.65e-12	7.85e-13	4.99961e-11
	0.948	2.3e-12	-2.82e-13	5.00014e-11	-7.41e-12	-3e-13	5.00015e-11
	0.948	2.28e-12	-2.06e-13	5.0001e-11	-7.15e-12	-7.07e-13	5.00035e-11
	0.948	2.29e-12	6.14e-14	4.99997e-11	-6.91e-12	-9.78e-13	5.00049e-11
	0.948	2.27e-12	2.14e-13	4.99989e-11	-6.31e-12	-1.25e-12	5.00063e-11
	0.948	2.28e-12	4.43e-13	4.99978e-11	-6.24e-12	-7.75e-13	5.00039e-11
	0.948	2.28e-12	6.72e-13	4.99966e-11	-6.17e-12	-2.87e-14	5.00001e-11
	0.948	2.29e-12	7.48e-13	4.99963e-11	-6.47e-12	8.53e-13	4.99957e-11
	0.948	2.26e-12	5.57e-13	4.99972e-11	-6.57e-12	1.4e-12	4.9993e-11
	0.948	2.17e-12	4.05e-13	4.9998e-11	-6.55e-12	1.33e-12	4.99934e-11
	0.948	2.24e-12	6.34e-13	4.99968e-11	-6.64e-12	4.46e-13	4.99978e-11
	0.948	2.35e-12	1.76e-13	4.99991e-11	-5.65e-12	-3.68e-13	5.00018e-11
	0.948	2.41e-12	-3.2e-13	5.00016e-11	-5.06e-12	-1.05e-12	5.00053e-11
	0.948	2.34e-12	-4.73e-13	5.00024e-11	-5.56e-12	-1.11e-12	5.00056e-11
	0.949	2.36e-12	-7.78e-13	5.00039e-11	-5.16e-12	-1.25e-12	5.00063e-11
	0.949	2.39e-12	-8.54e-13	5.00043e-11	-4.28e-12	-5.03e-13	5.00025e-11
	0.949	2.19e-12	-7.78e-13	5.00039e-11	-4.11e-12	5.14e-13	4.99974e-11
	0.949	2.27e-12	-6.63e-13	5.00033e-11	-4.19e-12	1.6e-12	4.9992e-11
	0.949	2.38e-12	-3.2e-13	5.00016e-11	-3.99e-12	1.53e-12	4.99923e-11
	0.949	2.45e-12	-2.06e-13	5.0001e-11	-5.02e-12	9.21e-13	4.99954e-11
	0.949	2.35e-12	9.96e-14	4.99995e-11	-4.02e-12	-1.64e-13	5.00008e-11
	0.949	2.32e-12	2.52e-13	4.99987e-11	-3.39e-12	-5.71e-13	5.00029e-11
	0.949	2.33e-12	4.05e-13	4.9998e-11	-3.83e-12	-1.11e-12	5.00056e-11
	0.949	2.32e-12	5.57e-13	4.99972e-11	-4.02e-12	-1.11e-12	5.00056e-11
	0.949	2.36e-12	5.95e-13	4.9997e-11	-3.99e-12	-1.05e-12	5.00053e-11
	0.949	2.46e-12	5.19e-13	4.99974e-11	-3.18e-12	-2.87e-14	5.00001e-11
	0.949	2.51e-12	5.19e-13	4.99974e-11	-2.11e-12	9.21e-13	4.99954e-11
	0.949	2.38e-12	2.9e-13	4.99986e-11	-1.98e-12	1.53e-12	4.99923e-11
	0.949	2.41e-12	2.33e-14	4.99999e-11	-2.27e-12	1.06e-12	4.99947e-11
	0.949	2.47e-12	-2.06e-13	5.0001e-11	-1.87e-12	2.43e-13	4.99988e-11
	0.949	2.42e-12	-5.87e-13	5.00029e-11	-2.76e-12	-7.75e-13	5.00039e-11
	0.949	2.38e-12	-5.49e-13	5.00027e-11	-2.78e-12	-1.05e-12	5.00053e-11
	0.949	2.4e-12	-5.87e-13	5.00029e-11	-2.27e-12	-1.32e-12	5.00066e-11
	0.949	2.45e-12	-5.87e-13	5.00029e-11	-2.88e-12	-9.78e-13	5.00049e-11
	0.95	2.43e-12	-5.11e-13	5.00026e-11	-2.51e-12	-3e-13	5.00015e-11
	0.95	2.42e-12	-4.34e-13	5.00022e-11	-1.96e-12	5.82e-13	4.99971e-11
	0.95	2.47e-12	-2.82e-13	5.00014e-11	-2.05e-12	1.8e-12	4.9991e-11
	0.95	2.43e-12	6.14e-14	4.99997e-11	-1.94e-12	1.94e-12	4.99903e-11
	0.95	2.51e-12	4.05e-13	4.9998e-11	-1.56e-12	8.53e-13	4.99957e-11
	0.95	2.44e-12	4.43e-13	4.99978e-11	-1.87e-12	-3.68e-13	5.00018e-11
	0.95	2.43e-12	5.57e-13	4.99972e-11	-2.13e-12	-1.05e-12	5.00053e-11
	0.95	2.47e-12	7.48e-13	4.99963e-11	-2.3e-12	-1.45e-12	5.00072e-11
	0.95	2.48e-12	7.1e-13	4.99965e-11	-1.83e-12	-1.59e-12	5.0008e-11
	0.95	2.46e-12	5.57e-13	4.99972e-11	-2.13e-12	-9.1e-13	5.00046e-11
[truncated: 39,501 more rows]
