# Supplementary material for: A toolbox for ablating excitatory and inhibitory synapses
Source: eLife. 2025 Apr 29;13:RP103757. doi: 10.7554/eLife.103757 (PMC12040315; doi:10.7554/eLife.103757)
Supplement: Figure 4—figure supplement 1—source data 1. [file elife-103757-fig4-figsupp1-data1.xlsx]

## Sheet: Sheet1
	TagRFP control+ 400 nm ligth		PBP + Ambient light
	T0	3 hr
	1.10395	1.10909	1.23577	1.0908
	1.15605	1.45722	1.43284	1.33511
			1.23921	1.21426
	1.11669	1.03322	1.33721	1.31598
	1.44502	1.21199	1.03347	1.10162
	1.2896	1.16569	1.55481	1.80025
	1.18189	1.21044	1.16673	1.34163
	1.24501	1.17019	1.47319	1.39431
	1.1643	1.19539	1.02016	1.00259
	1.31192	1.12901	1.57682	1.5277
	1.2578	1.47333	1.33136	1.41529
	1.44507	1.45258	1.45839	1.51692
	1.11609	1.1172	1.18043	1.22911
	1.32497	1.3037	1.23797	1.19934
			1.24334	1.46105
