# Supplementary material for: A toolbox for ablating excitatory and inhibitory synapses
Source: eLife. 2025 Apr 29;13:RP103757. doi: 10.7554/eLife.103757 (PMC12040315; doi:10.7554/eLife.103757)
Supplement: Figure 4—source data 3. [file elife-103757-fig4-data3.xlsx]

## Sheet: Fig. 4
PBP
T0	3 hr
1.40999	4.43648
1.19438	3.59795
1.1188	7.15715
1.35363	2.62253
0.98291	2.03243
1.50266	2.33779
1.27137	6.0411
1.5145	6.31111
1.27347	5.80759
2.24438	4.08862
2.2357	6.10468
