# Supplementary material for: A toolbox for ablating excitatory and inhibitory synapses
Source: eLife. 2025 Apr 29;13:RP103757. doi: 10.7554/eLife.103757 (PMC12040315; doi:10.7554/eLife.103757)
Supplement: Figure 5—figure supplement 1—source data 1. [file elife-103757-fig5-figsupp1-data1.xlsx]

## Sheet: Supplement A
	PhoCl Only	PhoCl + PBP	Cry2 Only	Cry2 + CIB1
	2626	1192	1099.38	302.469
	1117	1728	1099.38	454.053
	1722	1214	1099.38	766.792
	1800	1723	1099.38	441.536
	1862	2255	1053.57	1179
	2306	1330	1697.92	985
	1786	1184	1088.47	383
	1207	1573	1038.38	825
	1721	1748	1950.26	677
	988	1716		464

## Sheet: Supplement E
	Neuron	Gphn Total Day 0	Gphn Avg Day 0	Gphn puncta 0	Gphn Total 5 hr	Gphn Avg 5hr	Gphn puncta 5hr
	122123 phocl Ch2N2	816417	323.205	221	830877	331.687	221
	122123 phocl Ch2N3	2.05152e+06	392.486	416	1.56631e+06	331.705	400
	122123 phocl Ch2N4	1.01104e+06	649.351	120	869192	552.57	134
	122123 phocl Ch2N5	1.34639e+06	298.535	356	1.13916e+06	286.653	326
	122123 phocl Ch2N8	1.11059e+06	301.218	287	1.02611e+06	261.23	309
	122123 phocl Ch2N9	721358	287.852	213	657718	258.537	205
	122723 phocl Ch1N5	1.35061e+06	429.038	227	1.29932e+06	372.511	241
	122723 phocl Ch1N7	1.5689e+06	351.457	364	1.19119e+06	310.611	339
	122723 phocl Ch2N3	861834	324.242	167	832607	284.36	195
	122723 phocl Ch2N6	907620	277.729	239	813087	246.315	236
	122723 phocl ch2N8	1.36664e+06	509.371	214	1.05874e+06	431.609	187
	122123 phocl Ch3N6	1.49944e+06	349.113	325	1.42815e+06	325.69	322
	122123 phocl cH4N2	1.61216e+06	370.697	376	1.50811e+06	330.002	393
	122123 phocl Ch4N6	812621	578.378	122	836758	498.07	117
