# Supplementary material for: A toolbox for ablating excitatory and inhibitory synapses
Source: eLife. 2025 Apr 29;13:RP103757. doi: 10.7554/eLife.103757 (PMC12040315; doi:10.7554/eLife.103757)
Supplement: Figure 5—source data 1. [file elife-103757-fig5-data1.xlsx]

## Sheet: Figure 5E
Neuron	Gphn Total Day 0	Gphn Avg Day 0	Gphn puncta 0	Gphn Total 5 hr	Gphn Avg 5 hr	Gphn puncta 5 hr	Total Fn diff	# puncta
122123 561 Ch2N1	2.01722e+06	297.789	466	853468	221.163	286	0.42309	0.613734
122123 561 Ch2N2	1.40224e+06	275.327	423	516887	166.309	214	0.368615	0.50591
122123 561 Ch2N3	586230	288.926	131	333756	184.294	133	0.569326	1.01527
122123 561 Ch2N6	976309	422.462	168	432537	260.722	119	0.443033	0.708333
122123 561 Ch1N1	1.19624e+06	365.487	209	253470	248.257	64	0.211889	0.30622
122123 561 Ch1N4	1.53824e+06	602.758	208	364483	298.024	80	0.236948	0.384615
122123 561 Ch1N6	1.194e+06	385.161	197	628915	318.277	208	0.52673	1.05584
122723 561 Ch1N2	1.52184e+06	420.747	238	991863	304.346	201	0.651752	0.844538
122123 561 Ch1N7	953478	374.206	211	385994	214.56	147	0.404827	0.696682
122123 561 Ch1N8	806329	376.437	165	100641	147.136	42	0.124814	0.254545
122123 561 Ch1N11	1.70606e+06	437.676	282	608747	257.725	141	0.356815	0.5
122123 561 Ch1N13	1.59855e+06	488.704	285	682099	233.356	239	0.426699	0.838596
122123 561 Ch1N14	1.71164e+06	357.859	446	884930	220.461	332	0.517006	0.744395
122123 561 Ch2N5	1.40316e+06	398.624	305	655178	240.874	218	0.466932	0.714754
122723 561 Ch3N2	1.42073e+06	391.17	278	608224	258.269	167	0.428107	0.600719
122723 561 Ch3N3	1.06115e+06	294.517	315	189384	267.492	59	0.178471	0.187302
122723 561 Ch3N9	1.01154e+06	352.331	223	306664	263.231	94	0.303165	0.421525
							0.390483

## Sheet: Figure 5I
Neuron	Gphn Total Day 0	Gphn Avg Day 0	Gphn puncta 0	Gphn Total 5hr	Gphn Avg 5hr	Gphn puncta 5hr	Gphn Total day 4	Gphn Avg day 4	Gphn puncta day 4	4/T0
122723 561 Ch1N4	858011	415.301	145	270144	212.544	72	387443	340.46	82	0.314849
122723 561 Ch1N7	1.29708e+06	401.822	230	734855	234.254	175	1.29985e+06	307.148	373	0.566545
122723 561 Ch1N8	1.22052e+06	394.864	194	276903	183.623	100	539950	364.093	107	0.226872
122723 561 Ch1N9	1.12427e+06	425.056	212	666794	296.749	183	943030	355.86	200	0.593089
122723 561 Ch1N11	803506	406.427	133	289417	214.383	95	581011	421.634	105	0.360193
122723 561 Ch1N12	1.20213e+06	395.567	204	476984	218.7	182	500360	299.796	108	0.396783
122723 561 Ch3N1	836865	183.644	353	390112	123.845	246	654200	166.803	302	0.466159
122723 561 Ch3N3	1.28996e+06	330.675	336	286281	169.197	127	676292	268.903	207	0.22193
122723 561 Ch3N6	1.28036e+06	449.879	234	772546	315.582	197	886659	366.539	188	0.603384
122723 561 Ch3N7	1.31082e+06	371.127	226	654251	306.872	179	765756	368.684	172	0.499116
122723 561 Ch3N9	1.09643e+06	362.818	227	507792	250.638	131	451448	339.69	99	0.46313
122723 561 Ch3N10	1.15278e+06	322.816	225	246915	245.199	54	876327	368.05	154	0.214192
122723 561 Ch3N12	941225	371.732	194	496745	225.896	159	691880	487.239	112	0.527764
122723 561 Ch3N14	675945	351.505	138	217325	211.406	67	787121	313.719	173	0.321513
122723 Ch4N8	592783	363.448	110	255099	247.669	67	566957	524.475	87
