# Supplementary material for: A toolbox for ablating excitatory and inhibitory synapses
Source: eLife. 2025 Apr 29;13:RP103757. doi: 10.7554/eLife.103757 (PMC12040315; doi:10.7554/eLife.103757)
Supplement: Figure 6—figure supplement 1—source data 1. [file elife-103757-fig6-figsupp1-data1.xlsx]

## Sheet: Sheet1
		Date
		Construct:
		Neuron	gphn Total Day 0	gphn Avg Day 0	Gphn puncta 0	gphn Total T2	gphn avg T2	Gphn puncta T2	gphn % change	# change
		050823 S-iGFE3Ch1N3	718317	187.013	305	564128	175.086	269		-0.118033
		050823 S-iGFE3Ch1N5	668045	138.312		460193	119.593	217	couldn't discern synapses on T2	#DIV/0!
		050823 S-iGFE3Ch1N6	726423	133.829	393	742564	137.334	366		-0.0687023
		050823 S-iGFE3Ch1N7	335233	185.007	146	593794	163.085	220		0.506849
		050823 S-iGFE3Ch1N8	464294	212.686	163	326208	155.782	133		-0.184049
		050823 S-iGFE3Ch1N9	254347	105.714	188	437366	112.549	284		0.510638
		050823 S-iGFE3Ch1N11	328258	156.239	138	516293	172.5	185		0.34058
		050823 S-iGFE3Ch1N13	254071	168.706	98	336901	223.706	98		0
