# Supplementary material for: A toolbox for ablating excitatory and inhibitory synapses
Source: eLife. 2025 Apr 29;13:RP103757. doi: 10.7554/eLife.103757 (PMC12040315; doi:10.7554/eLife.103757)
Supplement: Figure 6—source data 1. [file elife-103757-fig6-data1.xlsx]

## Sheet: Figure 6E
	CCR5ZF-tagRFP-G69-HT
	DHFR-HA-XIAP.RING
	100nM TH PEG for 4 hrs
	Date
	Construct:
	Neuron	Gphn Total Day 0	Gphn Avg Day 0	gphn puncta 0	Gphn Total 4hr	Gphn avg 4hr	gphn puncta 4hr	% change	# puncta
	050123 D-iGFE3 Ch1N3	697186	240.492	220	169509	137.143	89	-75.6867	-59.5455
	050123 D-iGFE3 Ch1N4	405016	176.863	166	58436	99.8906	23	-85.5719	-86.1446
	050123 D-iGFE3 Ch1N7	606614	186.996	258	112170	108.168	33	-81.5088	-87.2093
	050123 D-iGFE3 Ch1N8	396107	128.523	221	126616	74.3925	113	-68.0349	-48.8688
	050123 D-iGFE3 Ch2N2	560649	209.119	215	161645	69.0496	145	-71.1682	-32.5581
	050123 D-iGFE3 Ch2N3	384998	157.915	129	112472	69.0436	108	-70.7863	-16.2791
	050123 D-iGFE3 Ch2N4	847999	257.829	277	236733	123.042	133	-72.0833	-51.9856
	050123 D-iGFE3 Ch2N7	1.05172e+06	325.309	232	530788	220.886	185	-49.5316	-20.2586
	050123 D-iGFE3 Ch2N8	1.13453e+06	254.665	372	261858	116.226	138	-76.9193	-62.9032
	050123 D-iGFE3 Ch2N10	954716	232.858	339	183126	84.4677	142	-80.8188	-58.1121
	050123 D-iGFE3 Ch2N11	611069	173.058	257	131426	57.795	150	-78.4925	-41.6342
	050123 D-iGFE3 Ch2N12	628196	186.022	262	264477	98.5017	78	-57.899	-70.229
								-72.3751	-52.9773

## Sheet: Figure 6I
	D-iGFE3
	100nM TH overnight
	Neuron	Gphn Total Day 0	Gphn Avg Day 0	gphn puncta 0	Gphn Total day 1	Gphn avg day1	gphn puncta day 1	% change	# puncta
	050223 D-iGFE3 Ch3N3	415931	199.679	160	85778	143.441	21	20.6231	13.125
	050223 D-iGFE3 Ch3N4	377090	156.469	168	71211	132.609	15	18.8844	8.92857
	050223 D-iGFE3 Ch3N6	644256	176.412	228	69763.9	170.99	14	10.8286	6.14035
	050223 D-iGFE3 Ch3N7	882027	219.574	283	66309.1	117.778	18	7.5178	6.36042
	050223 D-iGFE3 Ch3N9	889982	201.353	341	60965	127.276	19	6.85014	5.57185
	050223 D-iGFE3 Ch3N10	535850	166.672	221	92070	160.681	22	17.182	9.95475
	050223 D-iGFE3 Ch3N13	570913	184.702	177	41687	91.6197	12	7.30181	6.77966
	050223 D-iGFE3 Ch4N1	736915	185.574	318	32990	156.351	19	4.47677	5.97484
	060523 D-iGFE3 Ch3N3	377542	185.07	152	19852	124.855	5	5.25822	3.28947
	060523 D-iGFE3 Ch3N4	521259	207.59	202	20353	131.31	8	3.90458	3.9604
	060523 D-iGFE3 Ch3N6	457957	215.408	168	73539	162.697	16	16.0581	9.52381
	060523 D-iGFE3 Ch3N9	543881	134.891	283	53335	79.4858	32	9.80637	11.3074
								10.7243
								89.2757

## Sheet: Figure 6N
	Date
	Construct:
	Neuron	Gphn Total Day 0	Gphn Avg Day 0	Gphn puncta 0	Gphn Total Day 1	Gphn avg day1	Gphn day1	Gphn Total Day 2	Gphn avg day 2	Gphn day 2	Gphn Total Day 3	Gphn avg day 3	Gphn day 3
	072523 Ch1N2	882875	202.541	342	122106	224.873	17	575162	199.018	220	651113	203.092	232
	072523 Ch1N10	501759	184.742	209	96053	123.62	19	339589	165.572	132	577677	183.915	226
	072623 Ch3N1	779253	170.478	297	0	0	0	477530	192.863	174	590618	169.377	231
	072623 Ch3N6	721456	172.515	302	199688	218.238	19	504804	142.802	237	585312	166.946	242
	072623 Ch3N8	787894	213.985	298	0	0	0	793378	213.102	240	630838	207.786	228
	072623 Ch3N14	637410	173.776	289	258876	356.578	46	411472	152.623	167	372207	115.127	234
	072623 Ch3N15 nice	1.23155e+06	294.347	333	248500	199.438	58	863027	231.81	279	777644	207.815	277
	072623 Ch4N1	1.23545e+06	305.276	348	139229	219.951	30	959355	258.726	290	997546	270.631	297
	072623 Ch4N5- nice	1.21017e+06	239.495	405	229479	254.411	19	800619	207.468	279	881579	202.151	311
	072623 Ch4N14 d3 not compelte	777312	209.801	317	144012	179.342	27	269418	112.963	160	430481	137.358	175
	072623 Ch4N16	777728	269.951	244	954630	327.826	46	781206	204.344	258	817220	228.338	268

## Sheet: Figure 6 figure supplement C
	iGFE3
	CCR5ZFL-tagRFP-G69-TPR3-HT
	SnapTag-HA-XIAP.RING
	Date
	Construct:
	Neuron	gphn Total Day 0	gphn Avg Day 0	Gphn puncta 0	gphn Total T2	gphn avg T2	Gphn puncta T2	gphn % change	# change
	050823 S-iGFE3Ch1N3	718317	187.013	305	564128	175.086	269		-0.118033
	050823 S-iGFE3Ch1N5	668045	138.312		460193	119.593	217	couldn't discern synapses on T2	#DIV/0!
	050823 S-iGFE3Ch1N6	726423	133.829	393	742564	137.334	366		-0.0687023
	050823 S-iGFE3Ch1N7	335233	185.007	146	593794	163.085	220		0.506849
	050823 S-iGFE3Ch1N8	464294	212.686	163	326208	155.782	133		-0.184049
	050823 S-iGFE3Ch1N9	254347	105.714	188	437366	112.549	284		0.510638
	050823 S-iGFE3Ch1N11	328258	156.239	138	516293	172.5	185		0.34058
	050823 S-iGFE3Ch1N13	254071	168.706	98	336901	223.706	98		0
